# Supplementary material for: Gene expression profile identifies distinct molecular subtypes and potential therapeutic genes in Merkel cell carcinoma
Source: PubMed Central journal article supplement — Transl Oncol. 2020 Aug 6;13(11):100816. doi: 10.1016/j.tranon.2020.100816 (PMC7412862; doi:10.1016/j.tranon.2020.100816), 2020-08-06
Supplement: mmc1.pdf [file mmc1.pdf]

**Table 1. Clinopathological Characteristics of GSE39612 (N= 30)**

| Characteristic           | Patients (%) | Subtype I | Subtype II | Others | P value |
|--------------------------|--------------|-----------|------------|--------|---------|
| Total number             | 30           | 21        | 8          | 1      |         |
| Age (year)               |              |           |            |        |         |
| Mean                     | 78           | 79        | 70         |        | 0.273   |
| Range                    | 53-90        | 53-90     | 57-85      |        |         |
| Sex                      |              |           |            |        |         |
| Female                   | 14           | 9         | 5          |        | 0.678   |
| Male                     | 13           | 10        | 3          |        |         |
| Grade                    |              |           |            |        |         |
| Stage I                  | 10(33.3%)    | 7         | 3          |        | 0.136   |
| Stage II                 | 7(23.3%)     | 5         | 2          |        |         |
| Stage III                | 10(33.3%)    | 7         | 3          |        |         |
| Tumor type               |              |           |            |        |         |
| Primary                  | 18           | 14        | 5          |        | 0.134   |
| Metastasis               | 11           | 7         | 3          |        |         |
| Immunosuppression        |              |           |            |        |         |
| No                       | 23           | 17        | 6          |        | 0.545   |
| Yes                      | 4            | 2         | 2          |        |         |
| Locations                |              |           |            |        |         |
| Upper                    | 12           | 10        | 1          |        | 0.0468* |
| Middle                   | 8            | 6         | 2          |        |         |
| Lower                    | 7            | 4         | 3          |        |         |
| MCPyV1                   |              |           |            |        |         |
| Negative                 | 14           | 12        | 2          |        | 0.483   |
| Positive                 | 12           | 8         | 4          |        |         |
| Time to outcome (months) |              |           |            |        |         |
| Median                   | 14.5         | 13.5      | 16.5       |        | 0.507   |
| Range                    | 6-62         | 7-41      | 6-62       |        |         |
| Outcome                  |              |           |            |        |         |
| Alive                    | 14           | 10        | 4          |        | 0.673   |
| Dead                     | 10           | 6         | 4          |        |         |
