# Supplementary material for: Gene expression profile identifies distinct molecular subtypes and potential therapeutic genes in Merkel cell carcinoma
Source: PubMed Central journal article supplement — Transl Oncol. 2020 Aug 6;13(11):100816. doi: 10.1016/j.tranon.2020.100816 (PMC7412862; doi:10.1016/j.tranon.2020.100816), 2020-08-06
Supplement: mmc2.pdf [file mmc2.pdf]

**Table 2.** Results of SAM analysis between different subtypes of MCC in GSE39612. Data is representing overexpression of gene in two subtype in positive and minus value.

(1). Gene were ordered according the SAM significance, gene with the positive value were overexpressed in subtype II of MCC whereas minus value genes were overexpressed in subtype I.  
 (2). Significance increased with decreased of absolute values of ranks from 10 to 1 or -10 to -1.  
 Rank 1 or -1 genes are the most significant of SAM results.

| Gene symbol  | GSE39612 stIstosII | Gene symbol   | GSE39612 stIstosII | Gene symbol   | GSE39612 stIstosII | Gene symbol  | GSE39612 stIstosII | Gene symbol   | GSE39612 stIstosII |
|--------------|--------------------|---------------|--------------------|---------------|--------------------|--------------|--------------------|---------------|--------------------|
| AK3          | -10920             | CREBBP        | -7909              | SIGMAR1       | -4933              | YAF1         | -1309              | RGS1          | 5178               |
| PPP1R16A     | -10919             | UBR4          | -7908              | ARAF          | -4932              | RUNDC3A      | -1310              | C10orf62      | 5179               |
| NFIA         | -10918             | RP4-798A10.7  | -7907              | RABL2L1 // R. | -4931              | RBBP4        | -1311              | C22orf42      | 5181               |
| UBA6         | -10917             | CYB5B         | -7906              | DFAC110       | -4930              | FBRSL1       | -1312              | GLP1R         | 5181               |
| PRDM4        | -10916             | TCHP          | -7905              | THEM4         | -4929              | ALS2         | -1313              | DIO3          | 5183               |
| CWF19L1      | -10915             | C8orf59       | -7904              | ARMC8         | -4928              | CDK4         | -1316              | ST7-AS2       | 5186               |
| PRKAG2       | -10913             | ZNF101        | -7903              | ZRANB1        | -4927              | EZH2         | -1317              | FOXP2         | 5187               |
| TRCK         | -10912             | NOLC1         | -7902              | DFYFC4        | -4909              | UBE2C        | -1390              | TM6SF3 // TNX | 5188               |
| TANK         | -10911             | ZKSCAN3       | -7901              | CCND127       | -4925              | NUDCD2       | -1389              | KLHL18        | 5186               |
| LRRC73       | -10910             | HDAC4         | -7900              | HINT1         | -4924              | COMMD4       | -1388              | ANKRD20A12    | 5187               |
| RSAD1        | -10909             | HKFL4         | -7899              | ZNF502        | -4923              | RPAIN        | -1387              | LOC10192866   | 5189               |
| ZNF654       | -10908             | ZC3HAV1L      | -7898              | RP11-498C9.1  | -4922              | ZNF605       | -1386              | PIWIL2        | 5193               |
| SGOL1        | -10907             | MTX2          | -7897              | HU53          | -4921              | NKIRAS2      | -1385              | TNXX // TNX   | 5195               |
| ACPE         | -10906             | TRAM11L       | -7896              | POG5          | -4914              | NUP98        | -1378              | SP100         | 5193               |
| CADM2        | -10905             | NDUFR8        | -7894              | FCF1 // MAP   | -4919              | SAC3D1       | -1383              | CCDC7         | 5198               |
| TANC2        | -10904             | DNAIC12       | -7893              | NAASO         | -4918              | HSPD1        | -1382              | FAM118B       | 5199               |
| ARHGFE26     | -10903             | PPP3R1        | -7892              | MTAP          | -4917              | BRD3         | -1381              | APAF1         | 5200               |
| KRI1         | -10902             | EMD           | -7891              | E1F1          | -4916              | C10orf12     | -1380              | ST8SIA4       | 5202               |
| MEX3C        | -10901             | YTHDC2        | -7890              | FAM120A       | -4915              | RP11-384P7.7 | -1379              | C1R           | 5203               |
| LOC10050944  | -10900             | NIT1          | -7889              | PKG5          | -4914              | NUP98        | -1378              | SP100         | 5206               |
| CCDC186      | -10899             | KCNK3         | -7888              | EAP8          | -4913              | TMEM38B      | -1377              | IGF1          | 5207               |
| PEG3-AS1     | -10898             | SH2           | -7887              | RABF1         | -4912              | ATP5SL       | -1376              | LINC00869 //  | 5208               |
| TONS5        | -10897             | EXOC2         | -7886              | RBM18         | -4911              | RSBN1L       | -1375              | H0XB3         | 5210               |
| POP4         | -10896             | HECTD9        | -7885              | CHCHD2        | -4910              | CBX5         | -1374              | PBXIP1        | 5211               |
| BOLA2 // BO  | -10895             | DENND1B       | -7884              | AKO55981      | -4909              | SLC25A15     | -1373              | PDGFRL        | 5212               |
| RP11-539S1.1 | -10894             | PCM1          | -7883              | PSMD14        | -4908              | SMARCA5      | -1372              | LINC01192     | 5213               |
| STX2         | -10893             | EAF1          | -7882              | GMCL1         | -4907              | BIRC5        | -1371              | LCE1E         | 5214               |
| SOS2         | -10892             | DCAF10        | -7881              | NRCAM         | -4906              | UNC119B      | -1370              | SPATA24       | 5215               |
| ZNF7         | -10891             | DCTN3         | -7880              | SRSF11        | -4905              | H1FX         | -1369              | POLDIP3       | 5216               |
| HSPB11       | -10890             | DEU2          | -7879              | DXO           | -4904              | NPR3         | -1368              | POM121L10P    | 5218               |
| RBM26        | -10889             | CLC4          | -7878              | BC062753      | -4903              | USP1         | -1366              | H0OK3         | 5219               |
| GP88         | -10888             | DC527370 //   | -7877              | C7orf73 // U  | -4902              | C15orf40     | -1365              | TP53AP1       | 5220               |
| MEDE28       | -10887             | OLP1          | -7876              | SPHAK2        | -4901              | ZBTB39       | -1364              | HGCAT5        | 5221               |
| SEC61G       | -10886             | TBLX1         | -7875              | RBM22         | -4900              | EPB41        | -1363              | FRG1B         | 5222               |
| ZNF77        | -10885             | TIMM10B       | -7874              | NSMCE2        | -4899              | FBXW11       | -1362              | RRCRN         | 5223               |
| CSGALNACT2   | -10884             | CAND1         | -7873              | MOC52         | -4898              | PRPF3        | -1361              | FCN3          | 5224               |
| TMEM161B     | -10883             | FASTKD2       | -7872              | BUD31         | -4897              | MIR3656 // 1 | -1360              | CYP2A6        | 5225               |
| SHFM1        | -10882             | OGFOD1        | -7871              | DIDO1         | -4896              | C11orf31     | -1359              | UBR4          | 5226               |
| KIAA0430     | -10881             | CPB2          | -7870              | TUBA1C        | -4895              | YAP1         | -1360              | YAP1          | 5227               |
| APEX2        | -10880             | TOK           | -7869              | ZC3H6         | -4894              | UBLT-AS1     | -1357              | DUG1          | 5229               |
| PTCD3        | -10879             | ZFP41         | -7868              | TAF9B         | -4893              | WDHD1        | -1356              | C7orf62       | 5230               |
| YIPF6        | -10878             | ZNF12         | -7867              | GNB5          | -4892              | NOL7         | -1355              | ACSM5         | 5234               |
| PKP2         | -10877             | GG52          | -7866              | ARHGAP11B     | -4891              | SMKRI1       | -1354              | LAC1          | 5235               |
| TAFAP2B      | -10876             | MHRP57        | -7865              | ARH1          | -4890              | GFMT2        | -1353              | LOC10192897   | 5236               |
| MCC          | -10875             | SLC44A4       | -7864              | NTSC3A        | -4889              | NUP98        | -1352              | SH3BP2        | 5237               |
| C9orf89      | -10874             | SEC22C        | -7863              | DELL1         | -4888              | MTHFS // ST  | -1351              | SLC11A1       | 5239               |
| BSDC1        | -10873             | SPPL3         | -7862              | FANCM         | -4887              | LOC10013009  | -1350              | PARP10        | 5241               |
| DMPK         | -10872             | EP400         | -7861              | PTGR1         | -4886              | SLC38A1      | -1349              | BLNK          | 5242               |
| FARSA        | -10871             | MTAP          | -7860              | GUF1          | -4885              | MRPS11       | -1348              | DGKA          | 5246               |
| CNCG2        | -10870             | SUV39H1       | -7859              | FBXO42        | -4884              | ZNF91        | -1347              | TDFG1 // TD   | 5247               |
| ME3          | -10869             | HES7          | -7857              | HEB2          | -4883              | LOC1004076   | -1346              | FCRL2         | 5248               |
| KDEL2        | -10868             | HMG81         | -7856              | HNRNP1        | -4882              | ITF1         | -1345              | ABCL13        | 5249               |
| LINC00957    | -10867             | C22orf29 // C | -7855              | PHACTR1       | -4881              | SPATA5       | -1344              | RP11-2201S.5  | 5249               |
| ATP6V0E1     | -10866             | SYMPK         | -7854              | PHLNL1        | -4880              | LOC10028909  | -1343              | ITGB8         | 5252               |
| SUPT20H      | -10865             | AIFM1         | -7853              | GPR89A // G   | -4879              | FAM126B      | -1342              | CPEB3         | 5254               |
| IFT2         | -10864             | CUL4B         | -7852              | IKZF5         | -4878              | CSE1L        | -1341              | RPS-1039K5.1  | 5256               |
| LCHD1        | -10863             | SIRT4         | -7851              | NTSC3A        | -4877              | GFMT1        | -1340              | IL3RA         | 5257               |
| TARS         | -10862             | ENOSF1        | -7850              | DAF7          | -4876              | NLK          | -1339              | DC1           | 5259               |
| LOC10065293  | -10861             | AP3M1         | -7849              | UBQLN4        | -4875              | MIR52        | -1338              | PCMTD1        | 5260               |
| SLC30A7      | -10860             | TSR1          | -7848              | PLAA          | -4874              | MIS18BP1     | -1337              | OVOL1         | 5261               |
| FAM120A      | -10859             | TPBGL         | -7847              | KIF26A        | -4873              | THAP1        | -1336              | CASP10        | 5263               |
| SPPL3        | -10858             | LOC10106074   | -7846              | ZNF2591 //    | -4872              | CEP41        | -1335              | LOC10192823   | 5264               |
| FAM124A      | -10857             | ZMYND8        | -7845              | MTOR          | -4871              | TP53         | -1334              | ISP           | 5265               |
| SNX2L2       | -10856             | MKS1          | -7844              | LOC10192707   | -4870              | QRS1         | -1333              | TMEM63A       | 5266               |
| ZNF704       | -10855             | PQB1          | -7843              | ZSCAN21       | -4869              | TIGD7        | -1332              | LOC1019269C   | 5267               |
| PCDH8        | -10854             | MGEA5         | -7842              | TTCL4         | -4868              | PCNLX4       | -1331              | FAM185A       | 5268               |
| TMEM178A     | -10853             | RGS10         | -7841              | EPS15L1       | -4867              | THUMPD1      | -1330              | LINC00598     | 5269               |
| TLL4         | -10852             | SBN01         | -7840              | LDLR2         | -4866              | E2F6         | -1329              | BUB1          | 5270               |
| TMEM126A     | -10851             | CXCC4         | -7839              | MFF           | -4865              | RBL1         | -1328              | ADAMTS-AS     | 5271               |
| DNAIC16      | -10850             | KCH-AS1       | -7838              | COX6A         | -4864              | LINC01128    | -1327              | CTAS1 // C    | 5272               |
| PPP1R2       | -10848             | TMEM181       | -7837              | ZNF436        | -4863              | POLAI        | -1326              | LOC10506161   | 5273               |
| RAPGEF4      | -10847             | UCP2          | -7836              | TUSC3         | -4862              | RP5-1136G13  | -1325              | CCNG2         | 5274               |
| FZD8 // MIR4 | -10846             | ZNF326        | -7835              | SLC4A1AP      | -4861              | DVL2         | -1324              | LOC1005059C   | 5275               |
| ZBTB37       | -10845             | PIGK          | -7834              | ZCCHC17       | -4860              | CAPRN1       | -1323              | ASB14         | 5278               |
| FRMD3        | -10844             | KD8           | -7833              | MIR4745 // T  | -4859              | GS2L3        | -1322              | FAM83A        | 5279               |
| METTL8       | -10843             | SRB2          | -7832              | LINC01128     | -4858              | KCTD1        | -1321              | LINC00926     | 5281               |
| OXADR        | -10842             | FAM166A       | -7831              | P1BF1         | -4857              | JRK          | -1320              | MUC13         | 5282               |
| RNF113A      | -10841             | LVRM7         | -7830              | AASDHPPP      | -4856              | GOSR1        | -1319              | LCE1E         | 5283               |
| LSM12        | -10840             | DGKD          | -7829              | MIR4697 // I  | -4855              | MTF2         | -1318              | TMEM150A      | 5285               |
| PSMC4        | -10839             | K18orf25      | -7828              | MEN1          | -4854              | PRMT6        | -1317              | LINC01128     | 5286               |
| ORL5         | -10838             | GABRR2        | -7827              | ILF3          | -4853              | FUS          | -1316              | USP24         | 5289               |
| NCV1A        | -10837             | NTS0C1        | -7826              | LOC1011282T   | -4852              | SOCS4        | -1315              | TYR           | 5291               |
| ATP5O        | -10836             | ZNF655        | -7825              | MYBL1         | -4851              | PZD28        | -1314              | LINC01192     | 5292               |
| SLC25A16     | -10835             | AGO2 // CAS   | -7824              | GEMIN9        | -4850              | STOX2        | -1313              | CTAGE15 // I  | 5293               |
| CDR2L        | -10834             | SMIM15        | -7823              | UBL7-AS1      | -4849              | CCAR1        | -1312              | LOC1001315E   | 5294               |
| ZNF599       | -10833             | FECH          | -7822              | FECH          | -4848              | NUDT3 // RP  | -1311              | STK32B        | 5295               |
| RHOBTB3      | -10832             | ILF3          | -7821              | KD8           | -4847              | RPE          | -1310              | SLC7A2        | 5296               |
| IREK1        | -10831             | PPRD          | -7820              | ISG15         | -4846              | ELP5         | -1309              | ASTN2         | 5297               |
| ZFYVE20      | -10830             | DCP2          | -7819              | HMG81         | -4845              | RP9 // RP9P  | -1308              | LOC10050551   | 5299               |
| RIFDC1       | -10829             | RANBP3        | -7818              | CASP3         | -4844              | LRBA         | -1307              | LOC10192803   | 5300               |
| CNCG2        | -10828             | ATP6V1D       | -7817              | YDC           | -4843              | DAAM1        | -1306              | INMT          | 5301               |
| SPIN3        | -10827             | TEX15         | -7816              | NDUFB3        | -4842              | MED31        | -1305              | XAF1          | 5304               |
| C3orf14      | -10826             | SLC14A        | -7815              | SF3A1         | -4841              | CRND2        | -1304              | EVK1          | 5307               |
| ZNF397       | -10825             | SHAR1         | -7814              | ATG10         | -4840              | GFMT0 // CE  | -1303              | PLN1          | 5308               |
| RNF81L       | -10823             | WRAP73        | -7813              | ZBED3         | -4839              | TAT          | -1302              | TAT           | 5309               |
| CELF2        | -10822             | C3orf38       | -7812              | TMEM254       | -4838              | POM2P3       | -1301              | SNORA71B      | 5310               |
| PIAS2        | -10821             | SSR1          | -7810              | UCHL5         | -4837              | TRIP13       | -1300              | SLC39A8       | 5311               |
| FAM19A1      | -10820             | UCP5          | -7809              | ATPAF1        | -4836              | LOC642852    | -1299              | ZFYVE28       | 5313               |
| SPATA18      | -10819             | AGCS          | -7808              | ABC87         | -4835              | NR5N1        | -1298              | DFB106A //    | 5314               |
| PKF3CA       | -10818             | FAM111B       | -7807              | NOL9          | -4834              | NUP54        | -1297              | SSX2 // SSX2  | 5315               |
| C2orf58      | -10817             | WRNIP1        | -7806              | CSNK2A1 //    | -4833              | DNAIC18      | -1296              | IL21          | 5316               |
| WDR4         | -10816             | TMEM41A       | -7805              | DMTF1         | -4832              | TTI2         | -1295              | LOC285902 //  | 5318               |
| APH1B        | -10815             | MADD          | -7804              | MED22         | -4831              | PBRM1        | -1294              | ADAM5         | 5320               |
| BAG2         | -10814             | GKKA          | -7803              | HLCS          | -4830              | PSMG3        | -1293              | TMEM63A       | 5321               |
| MIR525       | -10813             | MRPL1         | -7802              | TACO1         | -4829              | IGFBP1       | -1292              | UZAF1         | 5322               |
| EPN45        | -10812             | STAM2         | -7801              | MYO5A         | -4828              | OPIS-AS1     | -1291              | SH3BP2        | 5323               |
| PNPO         | -10811             | SIRT3         | -7800              | ZNF567        | -4821              | TBMT11       | -1290              | GAGE1 // G    | 5324               |
| TMEM231      | -10810             | C8orf48       | -7799              | UBR5          | -4826              | IK           | -1289              | DUK1          | 5325               |
| NUCB2        | -10809             | ZNF378P       | -7798              | GATAD2B       | -4825              | LOC10192874  | -1288              | ACAT1         | 5326               |
| GATC // SRSF | -10808             | E1F2A         | -7797              | NEFL          | -4824              | GNP3         | -1287              | AC009502.4    | 5327               |
| SPIRE2       | -10807             | TUN1          | -7796              | SLC25A33      | -4823              | RNMT         | -1286              | FLJ32154      | 5328               |
| OPD1         | -10806             | RTN2          | -7795              | IBTK          | -4822              | POT1         | -1285              | ZNF445        | 5330               |
| HMG5         | -10805             | ANKRD32       | -7794              | ZNF567        | -4821              | SUCD         | -1284              | SMG7          | 5331               |
| NFATC3       | -10804             | WTAP          | -7793              | STN3          | -4820              | DXS1         | -1283              | LOC10195015   | 5332               |
| COL4A3BP     | -10803             | ZNF302        | -7792              | UBLCP1        | -4819              | CCT8         | -1282              | XG            | 5334               |
| PRDX4        | -10802             | SLC25A6       | -7791              | AK6 // TAF9   | -4818              | CENPF        | -1281              | HISA7         | 5335               |
| CYSL2        | -10801             | TANC1         | -7790              | HNRNP         | -4817              | TUBGCP3      | -1280              | MKLN1         | 5336               |
| UG4          | -10800             | EF3A          | -7789              | PODXL         | -4816              | F501         | -1279              | IKZF2         | 5337               |
| CDK9         | -10799             | C12orf57      | -7788              | ARHGAP23      | -4815              | ABR          | -1278              | LRRFP1        | 5338               |
| TP53BP1      | -10798             | LINC00342     | -7787              | C1orf52       | -4814              | KPNA2        | -1277              | RG512         | 5341               |
| PIGA         | -10797             | NXPE3         | -7786              | WHSC1L1       | -4813              | GPR125       | -1276              | KCNJ15        | 5342               |
| FAM213B      | -10796             | MIR523        | -7785              | CD200         | -4811              | PRPF4        | -1275              | ZNF815P // I  | 5344               |
| GLA9-MVCBP   | -10795             | ZNF354C       | -7784              | CBAZT3        | -4810              | ELAVL4       | -1274              | BCL3 // MIRI  | 5349               |
| MGC57346     | -10794             | DRK1A         | -7783              | C17orf85      | -4809              | RAB9B        | -1273              | ZHX2          | 5350               |
| ZNF207       | -10793             | SRO           | -7782              | SRD           | -4808              | SRD          | -1272              | PTSG2         | 5351               |
| UBXN7        | -10792             | CALML4        | -7781              | C5orf10       | -4807              | MIR517       | -1271              | DTWD2         | 5352               |
| MCC1         | -10791             | RP1           |                    |               |                    |              |                    |               |                    |

|                |        |                |       |               |       |               |       |               |       |               |      |
|----------------|--------|----------------|-------|---------------|-------|---------------|-------|---------------|-------|---------------|------|
| LRRN3          | -10778 | DNAH9          | -7769 | PTPMT1        | -4796 | ATP6V1G2-DC   | -1860 | RP4-794H19    | -1496 | TCAIM         | 5364 |
| USP48          | -10777 | NSUN5P1 /// I  | -7768 | NLN           | -4795 | C1orf88       | -1859 | NPR1          | 1498  | LOC10013023   | 5365 |
| GTFC2          | -10776 | IPW /// LOC1   | -7767 | STP1          | -4794 | PABPC4L       | -1858 | F10           | 1499  | CASC17        | 5366 |
| PPFR1D         | -10775 | SNRPN /// SNI  | -7766 | GPDI1         | -4793 | NRA3          | -1857 | NRA3          | 1500  | PRSS22        | 5367 |
| CLF6           | -10774 | CRS5           | -7765 | KAT5          | -4792 | C6orf29       | -1856 | TMEM37        | 1501  | RADS1B        | 5368 |
| ST13           | -10773 | SMCS           | -7764 | GMPS          | -4791 | SRP1          | -1855 | RP11-108P20   | 1502  | MKNK1-AS1     | 5371 |
| JPK            | -10772 | DENN1D1A       | -7763 | NAP11L        | -4790 | ZNF8          | -1854 | AKAP13        | 1503  | ICOSLG        | 5372 |
| MEF2A          | -10771 | PRPF18         | -7762 | LOC10192901   | -4789 | ANP32E        | -1853 | GM2A          | 1505  | TUBA8         | 5373 |
| LOH12CR1       | -10770 | PRAME          | -7761 | LINC00294     | -4788 | SUMO1         | -1852 | RAP2A         | 1506  | MS42          | 5374 |
| KAT6B          | -10769 | FASN           | -7760 | KIF14         | -4787 | KIF14         | -1851 | ANKRD20A12    | 1507  | RPS27         | 5375 |
| RABA4C         | -10768 | LZIC           | -7759 | KIN           | -4786 | ZFSGALNACS    | -1850 | PART1         | 1509  | KCTD15        | 5376 |
| RIMBP2         | -10767 | GP1BB /// SEP  | -7758 | PEX6          | -4785 | KIAA1731      | -1849 | CELSR1        | 1510  | FUS           | 5377 |
| EFHC2          | -10766 | THAP6          | -7757 | RAB33A        | -4784 | ABHD12        | -1848 | DDR1-AS1      | 1511  | ADR2          | 5379 |
| SYNPR          | -10765 | ATP6V0A2       | -7756 | PRUNE         | -4783 | MRPL30        | -1847 | TP63          | 1512  | TRIMS         | 5380 |
| NUMBL          | -10764 | COA7           | -7755 | HSPA14        | -4782 | RAD54B        | -1846 | BMS1P20 ///   | 1514  | TMEM72        | 5383 |
| MARS           | -10763 | CLKF           | -7754 | SAMD1         | -4781 | USP49         | -1845 | RP11-115A15   | 1515  | C19orf26      | 5384 |
| PWHL4          | -10762 | ETP51          | -7753 | GCLM          | -4780 | KDM2B         | -1844 | HPSE2         | 1516  | SLC39A8       | 5385 |
| FAM178A        | -10760 | URGC           | -7752 | MATR3 /// SM  | -4779 | IMMP1L        | -1843 | CD300C        | 1517  | PLA2G12B      | 5386 |
| PROL1D         | -10759 | WRD20          | -7751 | EXO2          | -4778 | NUDCD1        | -1842 | EDN1          | 1518  | FOLH1         | 5389 |
| TPR            | -10758 | DQS8205 ///    | -7750 | HMGAI         | -4777 | MIR1236 /// I | -1841 | RHOH          | 1520  | FAM115C /// I | 5391 |
| INSR           | -10757 | ANAPC11        | -7749 | ZNF160        | -4776 | C11orf73      | -1840 | ITPK8         | 1522  | ARPN          | 5392 |
| NOUFAP3        | -10756 | SNR8           | -7748 | TMEM120B      | -4775 | LZ151         | -1839 | ARHGAP15 ///  | 1523  | LOC00626      | 5393 |
| LOC730202      | -10755 | DCP1B          | -7746 | STK39         | -4774 | SGCS          | -1838 | TRP51         | 1524  | SRP7          | 5397 |
| ABHD12         | -10754 | AGO2           | -7745 | DOK6          | -4773 | ZNF879        | -1837 | LRP10         | 1525  | SPAG8         | 5401 |
| NAC1           | -10753 | FAMS7B /// LI  | -7744 | SH3RF1        | -4771 | HMMR          | -1836 | ITGB8         | 1527  | NPAS2         | 5402 |
| SLC7A14        | -10752 | LSM3           | -7743 | PMPCB         | -4770 | METTL2A /// I | -1835 | ILSR4         | 1528  | FSCN3         | 5403 |
| ZDHHC21        | -10751 | KRI1           | -7742 | ADSL          | -4769 | DHPS          | -1834 | ZDHHC3        | 1530  | XG            | 5404 |
| H565T1         | -10750 | ZCH13          | -7741 | ARPC5         | -4768 | MSH2          | -1833 | LOC10192905   | 1531  | ZFYVE9        | 5405 |
| BBS5           | -10749 | RNCE /// RHO   | -7740 | CNP2          | -4767 | POLR2K        | -1832 | DCAF8         | 1533  | BCO34636 ///  | 5406 |
| ARFP1          | -10748 | TNPO3          | -7739 | RBM15         | -4766 | MLP55         | -1831 | ARMC4         | 1534  | LAMP5         | 5407 |
| PCDH810 /// I  | -10747 | ARV1           | -7738 | ITF46         | -4765 | ASPM          | -1830 | ARFGF2        | 1536  | MAN1A1        | 5410 |
| GALNT13        | -10746 | TMEM50A        | -7737 | MTERF3        | -4764 | HIC2          | -1829 | DOCK8         | 1537  | DCH52         | 5411 |
| WASL           | -10745 | LOH12CR2       | -7736 | TMEM182       | -4763 | MBTPS2        | -1828 | THBD          | 1538  | TEX11         | 5412 |
| PROX1          | -10744 | CLPP           | -7735 | PRKDC         | -4762 | C4orf46       | -1827 | MIR5188       | 1539  | STK4          | 5413 |
| HPS4           | -10743 | RSL1D1         | -7734 | CUL5          | -4761 | MIR3934 /// I | -1826 | SLFN1         | 1540  | TSG10         | 5414 |
| BLD9           | -10742 | CENPA          | -7732 | HELZ          | -4760 | UHRF1BP1L     | -1825 | CASP2         | 1543  | LOC10192852   | 5416 |
| LOC10099678    | -10741 | ALG13          | -7731 | PEX7          | -4759 | MTFMT         | -1824 | LOC1005075E   | 1544  | SLAMF1        | 5418 |
| VT1A           | -10740 | GK5            | -7730 | ADAT1         | -4758 | C1orf50       | -1823 | AMBRA1        | 1545  | ZNF518A       | 5419 |
| SLC25A42       | -10739 | ALKBHH         | -7729 | NPTX2         | -4757 | LINC00674     | -1822 | LINC01231     | 1546  | FCGR2B        | 5421 |
| TMEM22         | -10738 | DENNDSB        | -7728 | RAB11A        | -4756 | FCHSD2        | -1821 | F5            | 1547  | IFNB1         | 5422 |
| USP75          | -10737 | ARHGAP15       | -7727 | ANKRD1        | -4755 | ANKRD1        | -1820 | PLCG2         | 1548  | MCFB9         | 5424 |
| KLIF2          | -10735 | OSBP13         | -7726 | UBE2W         | -4726 | IP09          | -1819 | CLCF1         | 1551  | TNFSF11       | 5425 |
| UBR5           | -10734 | FBXL20         | -7725 | TRMT1L        | -4753 | SMARCA4       | -1818 | CDC14B        | 1553  | C20orf41      | 5426 |
| STX17          | -10733 | KNKNX1         | -7724 | C11orf90      | -4752 | GTFC3A        | -1817 | LOC10013344   | 1555  | CFI           | 5427 |
| C11orf1        | -10732 | RCHY1          | -7723 | NBR2          | -4751 | TTI1          | -1816 | AKAP13        | 1558  | LOC154761     | 5428 |
| MIB2           | -10731 | H2AFV          | -7722 | COX17 /// PO  | -4750 | DNA2          | -1815 | ADAMT15       | 1559  | LOC10192950   | 5429 |
| MYO6           | -10730 | PRICKLE4 /// I | -7721 | CUL5          | -4749 | BIRC4         | -1814 | LOC10192955   | 1560  | CFP2 /// LOC  | 5430 |
| ANKRD5         | -10729 | CEP95          | -7720 | LINC13A       | -4748 | CDK19         | -1813 | CDK19         | 1562  | IFTM1         | 5431 |
| ADCYAP1        | -10728 | TP1            | -7719 | CTC3B8M12     | -4747 | MAPK8         | -1812 | LOC10050547   | 1563  | SLC5A2        | 5433 |
| DENN1B         | -10727 | KDM4B          | -7718 | FBRSL1        | -4746 | SNAPC         | -1811 | BV0351J2.2 // | 1565  | NOTCH2        | 5438 |
| HOKAS          | -10726 | DAZAP1         | -7717 | MUS81         | -4745 | MIS18A        | -1810 | KCNH7         | 1569  | DAB2 /// LOC1 | 5440 |
| RPL5 /// SNOI  | -10725 | EFB1           | -7716 | RPS20 /// SNI | -4743 | PMS1          | -1809 | LOC284561     | 1570  | DSC2          | 5441 |
| C3orf91        | -10724 | SRMR4          | -7715 | TUG1          | -4742 | PARP2         | -1807 | KIFC3         | 1571  | C10orf67      | 5447 |
| GFRR8          | -10723 | PTHD1          | -7714 | CTD11         | -4741 | M2G2          | -1806 | GOLGA8I /// I | 1572  | PCF126        | 5454 |
| GUCY1A2        | -10720 | DHX15          | -7713 | CSNK2B        | -4740 | CENPU         | -1805 | SULT1C2       | 1574  | GYP4          | 5458 |
| ZNF41          | -10718 | ZNF684         | -7712 | PCNP          | -4739 | GUSBP1 /// G  | -1804 | CR2           | 1575  | ZNF664        | 5459 |
| BMP1A1         | -10717 | PRDM15         | -7711 | MAP4K4        | -4738 | ZNF616        | -1803 | GJA8          | 1576  | DCAF15        | 5472 |
| RAGB           | -10716 | HSP90AA1       | -7710 | ZNF793        | -4737 | HNRNPC        | -1802 | KCNJ15        | 1578  | MYNN          | 5477 |
| SETD2          | -10715 | FBXL20         | -7709 | ZNF24         | -4736 | CREB1         | -1801 | SASH1         | 1579  | ZNF986        | 5483 |
| FCDP2          | -10714 | ZNF148         | -7707 | ZNF15         | -4735 | COAS2         | -1800 | STK39         | 1580  | PCF11         | 5484 |
| PTTG2          | -10713 | ZNF500         | -7706 | RAE1          | -4734 | ACAP1         | -1799 | GF14          | 1582  | MBTPS2        | 5488 |
| MIR6834 /// I  | -10712 | GSTA1          | -7705 | DACH2         | -4733 | COMMD4        | -1798 | DDI1          | 1583  | NCSTN         | 5491 |
| MRRF           | -10711 | TBC8           | -7704 | TFB2M         | -4732 | ACTR6         | -1797 | ADAM7         | 1584  | ARPN          | 5492 |
| CCDC93         | -10710 | TTCT8          | -7703 | TXNL4A        | -4731 | RAD23B        | -1796 | AGR2          | 1585  | SEZEL2        | 5497 |
| NOL7           | -10709 | LACTB2         | -7702 | SIAH1         | -4730 | PARP6         | -1795 | LOC100642     | 1586  | AHCVL1        | 5498 |
| C11orf31       | -10708 | KIAA1983       | -7701 | LOC10050671   | -4729 | METTL15       | -1794 | LOC10099672   | 1589  | LOC1006074    | 5500 |
| ENO1           | -10707 | IGF2BP3        | -7700 | ZNF345        | -4728 | ZNF271        | -1793 | NRP2          | 1588  | FCRL4         | 5502 |
| C11orf1        | -10706 | CDK16          | -7699 | PDCD10        | -4727 | ADO           | -1792 | ALG2          | 1590  | DES           | 5506 |
| TRIM68         | -10705 | PTPA41         | -7698 | PTPA41        | -4726 | EXOS          | -1791 | CACNB4        | 1591  | LYNX1         | 5507 |
| ANKS1B         | -10704 | SEML13         | -7697 | ZNF7          | -4725 | CAMTA1        | -1790 | LOC10192765   | 1594  | SERPINB1      | 5509 |
| LRCH3          | -10703 | LOC389834 ///  | -7696 | FZR1          | -4724 | RPS6KA6       | -1789 | DCSTAMP       | 1596  | ERF3B         | 5510 |
| TF3A           | -10702 | CTD11          | -7695 | CTD11         | -4723 | OTV1B         | -1788 | SLN1          | 1598  | ALS2CL        | 5511 |
| TBCK           | -10701 | RBFA           | -7694 | MYO3D         | -4722 | KIF21A        | -1787 | CTNNA1        | 1599  | ACTN2         | 5530 |
| GPRL173        | -10700 | NTHL1          | -7693 | UXN8          | -4721 | EHMT1         | -1786 | ARHGAP30      | 1601  | SH3D19        | 5536 |
| GRK4           | -10699 | ZNF821         | -7692 | C2orf49       | -4720 | PAQR4         | -1785 | LOC10013087   | 1602  | ETV3          | 5540 |
| HCG8 /// ZNR   | -10698 | USP34          | -7691 | SKIDA1        | -4719 | IQCB1         | -1784 | FAM66D        | 1604  | TNRC6C        | 5545 |
| CCSER1         | -10697 | C12orf76 /// L | -7690 | MLX           | -4718 | MRLP22        | -1783 | CALB1         | 1605  | WTAP          | 5548 |
| PAF1           | -10696 | C2orf43        | -7689 | PRKDC         | -4717 | SRNP27        | -1782 | RC3H1         | 1607  | MCM3BP        | 5551 |
| VANGL1         | -10695 | ZNF19          | -7688 | PRKDC         | -4716 | LRPPRC        | -1781 | CEACAM6       | 1608  | ACAA2         | 5552 |
| FAM110A        | -10694 | PAT21          | -7687 | CKMT2-AS1     | -4715 | NME7          | -1780 | SYNPO2        | 1610  | ANKLE2        | 5553 |
| AKAP10         | -10693 | KHK            | -7686 | MEPCE         | -4714 | LCORL         | -1779 | MYCT1         | 1614  | CCDC129       | 5555 |
| LINC00667      | -10692 | TOE1           | -7685 | TMEM106C      | -4713 | BRX1          | -1778 | MEF2C         | 1615  | EPG5          | 5557 |
| RWD20A         | -10691 | VDC2           | -7684 | HSPA9         | -4712 | GATC /// SRSF | -1777 | SSX2 /// SSX2 | 1617  | ILIRN         | 5564 |
| TMCO1          | -10689 | SCARN13 ///    | -7683 | SNX19         | -4711 | KCNK1         | -1776 | TMEM106A      | 1619  | RAD23B        | 5565 |
| CNVI1A1        | -10688 | INP1B          | -7682 | POU3H         | -4710 | SOX2          | -1775 | SOX2          | 1710  | SAB1          | 5566 |
| MUCA           | -10687 | FNIP1          | -7681 | RRP36         | -4709 | SEB2          | -1774 | ABHD4         | 1621  | FOLH1 /// FOL | 5567 |
| UBE2G1         | -10686 | H3F3A /// H3I  | -7680 | GPHN          | -4708 | MAGI3         | -1773 | C10orf11      | 1622  | CALD1         | 5568 |
| ATPS11         | -10685 | DIS3           | -7679 | ZSCAN2        | -4707 | OR7E14P       | -1772 | SUN3          | 1623  | LOC10192793   | 5572 |
| CBBL2          | -10684 | ADNP2          | -7678 | COMMD2        | -4706 | NLN           | -1771 | SRPX2         | 1624  | HTRA          | 5577 |
| MOB1A          | -10683 | IP09           | -7677 | SMER2         | -4705 | DDX52         | -1770 | NAOK          | 1627  | RBBP9         | 5578 |
| SKIDA1         | -10682 | RND1           | -7676 | CEP350        | -4704 | CXCL4P2 /// I | -1769 | MENP3         | 1631  | UBE2I         | 5579 |
| MED12          | -10681 | IDH3G          | -7675 | KLCC          | -4703 | RUVBL1        | -1768 | C11orf21      | 1632  | RUNX2         | 5581 |
| SEC23IP        | -10680 | FRAT2          | -7674 | ATXN1L2       | -4702 | LEM03         | -1767 | ASXL3         | 1633  | KLFS          | 5583 |
| SNAP11         | -10679 | GABPB1-AS1     | -7673 | MCCR          | -4700 | LOC644656     | -1766 | JPH2          | 1634  | GTPBP10 /// L | 5590 |
| FNIP1          | -10678 | DHX8           | -7672 | PROX2         | -4699 | HSPA14        | -1765 | LOC10050681   | 1636  | ZNF396        | 5593 |
| HARB1          | -10677 | CENPC          | -7671 | TOR1A         | -4698 | BID           | -1764 | CYP4F12       | 1637  | HTR2A         | 5595 |
| UBE2D          | -10676 | MAG5           | -7669 | ZNF785        | -4697 | ZNF785        | -1763 | PCAM1         | 1638  | HNR61         | 5596 |
| AKR7A2         | -10674 | SLC8A1         | -7668 | SNHG17        | -4696 | MGA           | -1762 | PSGE          | 1639  | PIRF          | 5597 |
| GGCX           | -10673 | UHRF1BP1L      | -7667 | RAD54L        | -4695 | MPHOSPH9      | -1761 | ATP6VD2       | 1640  | 39326         | 5598 |
| RPS10L         | -10672 | GT2F2          | -7666 | MRPL42        | -4694 | KIAA1377      | -1760 | CSAD          | 1642  | AGF62         | 5612 |
| SCAMP1-AS1     | -10671 | TBC1D1         | -7664 | MMD           | -4692 | SOGA1         | -1759 | TRP           | 1643  | DNAH3         | 5617 |
| WXXC           | -10670 | BMS1           | -7663 | SLC37A4       | -4691 | MAP2K5        | -1758 | FUT7          | 1647  | TMPS52        | 5619 |
| MEM192 /// I   | -10669 | LOC10206046    | -7662 | AGAP1         | -4690 | GP111         | -1757 | CYTH1         | 1651  | LOC10040272   | 5621 |
| RPL18P10 /// I | -10668 | GUCY1A2        | -7661 | NF2           | -4688 | FBXL16        | -1756 | PM1K          | 1652  | LOC10050683   | 5625 |
| SUPT20H        | -10667 | RIOK2          | -7660 | GOSR1         | -4687 | HDFRFP3       | -1755 | C3orf49       | 1653  | ZNF496        | 5629 |
| CNOT6L         | -10666 | GUSBP5         | -7659 | NLK           | -4686 | RP11-379H18   | -1754 | MTAP          | 1654  | EFNA5         | 5633 |
| ALG10 /// ALI  | -10665 | NUP160         | -7658 | NHP2P2 /// N  | -4685 | CKB           | -1753 | LOC10192765   | 1655  | DKFZP34406    | 5635 |
| SBP4           | -10664 | CANT1          | -7657 | ARHGEF9       | -4684 | CAMTA1        | -1752 | ATF7          | 1656  | SLC17A9       | 5640 |
| RADS4L2        | -10663 | SLC38A1        | -7655 | CTNRL         | -4683 | COMMD5        | -1751 | LOC10192906   | 1657  | CDB           | 5644 |
| MTRF1          | -10662 | SPEN           | -7654 | MCRS1         | -4681 | RAVER1        | -1750 | TRPC7         | 1658  | PTPRB         | 5645 |
| CARS2          | -10661 | KAT6B          | -7653 | PAIP2         | -4680 | TOMM70A       |       |               |       |               |      |

|                |        |                |       |               |       |                |       |              |      |               |      |
|----------------|--------|----------------|-------|---------------|-------|----------------|-------|--------------|------|---------------|------|
| CEP135         | -10626 | MARCKS         | -7616 | EPM2A         | -4644 | C11orf58       | -1714 | FLJ36840     | 1708 | MAP3K2        | 5826 |
| SMIM19         | -10625 | WAC            | -7614 | PPP2R1B       | -4643 | LANCL2         | -1713 | FKL1         | 1709 | MTBP          | 5838 |
| DNAA4          | -10624 | PKD2           | -7614 | LOC645513     | -4642 | MAZ            | -1712 | KLF6         | 1710 | GBA3          | 5839 |
| RAB14          | -10622 | PIF10          | -7613 | TFPZL-AS1     | -4641 | PHF10          | -1711 | RAB4B        | 1711 | NCF2          | 5840 |
| FXO38          | -10621 | PMS2 /// PMS   | -7612 | KIAA1147      | -4640 | MTHFD2         | -1710 | LOC10192911  | 1712 | CCDC144A      | 5842 |
| NF2            | -10620 | SUTR4          | -7611 | NLN           | -4639 | LOC10192874    | -1709 | TFCP2L1      | 1714 | PVRL2         | 5845 |
| MTMR7          | -10619 | CELSR2         | -7610 | BCO4748A      | -4638 | RSF1           | -1708 | LOC1019276C  | 1715 | DDA1          | 5852 |
| AAMP           | -10618 | LOC10013289    | -7609 | IP011 /// IPO | -4637 | SNRNP40        | -1707 | LOC340107    | 1716 | CCDC149       | 5854 |
| LOC28392       | -10617 | GGPS1          | -7608 | NRN33         | -4636 | RSRC1          | -1706 | WOR7         | 1719 | PAPOLA        | 5855 |
| HABP1          | -10616 | CK2            | -7607 | CK2           | -4635 | CK2            | -1705 | PEF          | 1720 | ETS2          | 5859 |
| TIG04          | -10615 | COX15          | -7606 | PHF19         | -4634 | GFTH23         | -1704 | SERPINB9     | 1722 | FNATC2        | 5867 |
| RP517          | -10614 | TRAF4          | -7605 | PAN115        | -4633 | CCDC34         | -1703 | CSN152AP     | 1723 | TCTE3         | 5868 |
| C9orf85        | -10613 | FKBP1A /// LOC | -7604 | DHFR1L        | -4632 | WH5CL11        | -1702 | PTGDR        | 1724 | TGFR1         | 5870 |
| NOCL2          | -10612 | SILCS0A1       | -7603 | TRIM52-AS1    | -4631 | NIPSNAP1       | -1701 | AFF2         | 1725 | LOC10192891   | 5878 |
| PIGG           | -10611 | TLXNG          | -7602 | CREB1         | -4630 | ROCD1          | -1700 | NUP133       | 1726 | RASSFA        | 5879 |
| TASRL4         | -10609 | TRAK2          | -7601 | NIPSNAP1      | -4629 | MAP9           | -1699 | GATA1        | 1727 | PSMG4         | 5885 |
| PHLP2          | -10608 | ADAMT513       | -7600 | LMBRD2        | -4628 | CEP57          | -1698 | TMEM144      | 1730 | GLP1R         | 5889 |
| RTE1           | -10607 | B3GALNT2       | -7599 | EARS2         | -4627 | SUMO4          | -1697 | LOC10192727  | 1731 | CPXM2         | 5908 |
| GALNT13        | -10606 | LPRR1          | -7598 | KPNA1         | -4626 | MCM3AP-AS1     | -1696 | CD82         | 1732 | SLC2A12       | 5910 |
| PK3C2A         | -10604 | RP510P2 /// R  | -7597 | CTD-212488.8  | -4625 | MND1           | -1695 | GLI1         | 1733 | ADAMT59-AS2   | 5915 |
| MORNA          | -10603 | NAASO          | -7596 | ZFAND2A       | -4624 | PTOV1          | -1694 | CTC-527H23.4 | 1734 | PMCHL2        | 5923 |
| GNBS           | -10602 | COPS2          | -7595 | RPAIN         | -4623 | ULK2           | -1693 | MICA         | 1736 | PGM5          | 5924 |
| RALGAPB        | -10601 | ATPAF2         | -7594 | NSUN4         | -4622 | CEP7           | -1692 | PRO2         | 1737 | SASH1         | 5928 |
| FIP1L1         | -10600 | PPP2R2A        | -7593 | MED20         | -4621 | YEATS2         | -1691 | LOC1005064C  | 1738 | SIN3A         | 5931 |
| TOX3           | -10599 | COX18          | -7592 | PPID          | -4620 | GZE3           | -1690 | DEFB118      | 1739 | CD300LG       | 5932 |
| TTC14          | -10598 | LOC285074 ///  | -7591 | XPNPEP3       | -4619 | CCD27          | -1689 | LOC10192834  | 1740 | HRH1          | 5939 |
| KRR1           | -10597 | ATPS5          | -7590 | PINA          | -4618 | LOC728705 ///  | -1688 | ATF7         | 1741 | BMPR18        | 5945 |
| DNAA3          | -10596 | SHK1           | -7588 | STAG2         | -4617 | MLF2           | -1687 | SCUBE3       | 1742 | DEEL          | 5947 |
| FRLY           | -10595 | COPS2          | -7587 | PIGM          | -4616 | NUSAP1         | -1686 | POE78        | 1743 | KIF23         | 5953 |
| MARCKS         | -10594 | SHB            | -7586 | STG6AL2       | -4615 | ZNF571-AS1     | -1685 | CD01         | 1744 | KLF16         | 5957 |
| C11orf58       | -10593 | PIGT           | -7585 | ISOC1         | -4614 | EPM2AIP1       | -1684 | CLMP         | 1745 | TMEM174       | 5961 |
| HEATR3         | -10592 | C3orf67        | -7584 | GLT8D1        | -4613 | MAP2           | -1683 | PRDM1        | 1747 | SAT1          | 5962 |
| SYT14          | -10591 | MYBL2          | -7583 | FARS2         | -4612 | PKIA           | -1682 | ABCC8        | 1748 | TRABD2A       | 5965 |
| ASTE1          | -10590 | GUICY1A2       | -7582 | CEP44         | -4611 | COX11          | -1681 | CD6          | 1749 | PML           | 5968 |
| C11orf35       | -10589 | RAP1SD51       | -7581 | FAM184A       | -4610 | MS2            | -1680 | OTOP2        | 1750 | PARP10        | 5971 |
| STARD10        | -10588 | COX7C          | -7580 | ZNF350        | -4609 | Csorf24        | -1679 | THRD         | 1751 | ANKRD28       | 5972 |
| WBPS           | -10587 | SNRNP35        | -7579 | ANK1          | -4608 | ZNF512B        | -1678 | DGCR14       | 1752 | MAP4          | 5973 |
| SGO1           | -10586 | PHAX           | -7578 | ENAH          | -4607 | GTF2F1         | -1677 | AHNAK        | 1753 | LRP1          | 5977 |
| GSTZ1          | -10585 | MAPRE1         | -7576 | SC01          | -4606 | NUDT15         | -1676 | LOC1005064C  | 1754 | FOXN3         | 5984 |
| ARIH2          | -10584 | LOC728485      | -7575 | GPR98A /// G  | -4605 | PNN            | -1675 | S052         | 1756 | SUZ12         | 5986 |
| CMFPL3B        | -10582 | CK1B           | -7574 | LOC728485     | -4603 | UNQ1           | -1674 | FCM1         | 1758 | RDM1A         | 5989 |
| MTMR6          | -10581 | ARL13B         | -7573 | TIG07         | -4602 | TUBGCP5        | -1673 | TM5F20       | 1759 | WF0C9         | 5990 |
| PLRG1          | -10580 | CALM1 /// CA   | -7572 | TUBGCP4       | -4601 | CCD23          | -1672 | ENTPD3       | 1761 | LOC10065277   | 6007 |
| C11orf48 /// I | -10579 | PSMD07         | -7571 | LACTB2        | -4600 | NAPA           | -1671 | BCL6         | 1762 | IMPAD1        | 6011 |
| TMEM14C        | -10578 | UQCRC2         | -7570 | DMC1          | -4599 | ANP32B         | -1670 | CTC-510F12.4 | 1763 | TRPM3         | 6017 |
| FAM189B        | -10577 | DCX            | -7569 | HPI18P3       | -4598 | Csorf22        | -1669 | CNGA1        | 1766 | SAMD14        | 6019 |
| MTERF2         | -10576 | METTL21A       | -7568 | CKAF57        | -4597 | GNLS1          | -1668 | KLH3         | 1768 | SPTLC3        | 6024 |
| CGNE           | -10575 | ST13           | -7567 | POC2          | -4596 | METTL9         | -1667 | TM4SF1       | 1772 | GSD2          | 6030 |
| MAPK6          | -10574 | NUCB2          | -7566 | DPH7          | -4595 | NSG1           | -1666 | MCM3AP       | 1773 | MSA43         | 6036 |
| RCN1           | -10573 | MED26          | -7563 | SUV420H1      | -4594 | MKKS           | -1665 | RP11-803D5.4 | 1774 | CCDC88A       | 6038 |
| AB2            | -10572 | RP11-73K9.2    | -7562 | FN3KR         | -4592 | RNF219         | -1664 | AGRN         | 1775 | DCTN2         | 6041 |
| CEP41          | -10571 | DCPS           | -7561 | LOC7          | -4591 | CEP152         | -1663 | SSX3         | 1776 | ZBTB20        | 6044 |
| DNAA4          | -10570 | KDSR           | -7560 | NINL          | -4590 | APFM1          | -1662 | ETV1         | 1777 | TCER3         | 6045 |
| CEW2           | -10569 | KUJL20         | -7559 | ST5A3         | -4589 | F023           | -1661 | ST5A3        | 1779 | CY14A1        | 6049 |
| EIF4E2         | -10568 | FAM161A        | -7558 | PRPF39        | -4588 | C11orf73       | -1660 | LOC1009963A  | 1780 | FMO5          | 6053 |
| EIF2AK4        | -10567 | FBXO21         | -7557 | GTPBP10 ///   | -4587 | NAPB           | -1659 | PLA2G16      | 1781 | ABC84         | 6057 |
| RP58           | -10566 | DDX28          | -7556 | SCYL2         | -4586 | UBXN2B         | -1658 | CD1C         | 1783 | FGF7          | 6069 |
| SLC35F1        | -10565 | SMARCE1        | -7555 | CRPT          | -4585 | CEP57          | -1657 | IGSF3        | 1784 | SEMA4A        | 6085 |
| BCL11B         | -10564 | SRNP3          | -7554 | POP1          | -4584 | TRT1           | -1656 | METTL15      | 1787 | TUB           | 6086 |
| CNNA1          | -10563 | UPF3           | -7553 | UPF3          | -4582 | TOP1           | -1655 | UCR2         | 1789 | COL6A6        | 6088 |
| ATAD2          | -10562 | PKK3C          | -7552 | TMEM231       | -4581 | CHCHD3         | -1654 | HNFG4        | 1790 | STX16         | 6091 |
| CLDN12         | -10561 | BCL2 /// HNF   | -7551 | RRM1          | -4580 | SCARN1A5       | -1653 | FAM135B      | 1792 | SH3GLB2       | 6095 |
| CHKB-AS1       | -10560 | DCAF10         | -7550 | MRLP30        | -4579 | FARSB          | -1652 | DERL3        | 1793 | PLG           | 6097 |
| TAPT1          | -10559 | WH5CL11        | -7549 | ARID1A        | -4578 | BCOR           | -1651 | RGCC         | 1794 | ZNF287        | 6099 |
| CLSPN          | -10558 | SRSF8          | -7548 | SLC03A1       | -4577 | SLMO2          | -1650 | RN3          | 1795 | FGFR2         | 6100 |
| SPOP           | -10557 | ARHSE7         | -7547 | LOC64762      | -4576 | UBE2D9         | -1649 | SHROOM4      | 1796 | LOC10048      | 6105 |
| PCBP3          | -10556 | SH3PKD2A       | -7546 | HSPA4         | -4575 | CVFIP2         | -1648 | LOC10050625  | 1797 | FCRL4         | 6113 |
| PPM1A          | -10555 | CUX1           | -7545 | HIRP3         | -4573 | CEP78          | -1647 | SIK1         | 1798 | UBA6          | 6114 |
| KCNMA1         | -10554 | PEX10          | -7544 | G6PC3         | -4572 | CCNE1          | -1646 | VSX1         | 1799 | ZSCAN20       | 6117 |
| PEMT           | -10553 | LRP6           | -7543 | MEX3A         | -4571 | MBD5           | -1645 | MTMR1        | 1800 | MVB12B        | 6127 |
| ANKRD36C       | -10552 | CPX2           | -7542 | CEP85         | -4570 | WEE1           | -1644 | GUSBP11      | 1801 | GHRL          | 6130 |
| TMEM255A       | -10551 | ADAMT513       | -7541 | 375G08        | -4569 | LOC10192696    | -1643 | LOC10192696  | 1803 | IL1B          | 6133 |
| ADRA2C         | -10550 | BOLA2 /// LOC  | -7539 | ZNF430        | -4568 | SET /// SETSP1 | -1642 | LOC10192841  | 1804 | HRASL2        | 6145 |
| CTCF8          | -10549 | GFMI1          | -7538 | ATIC          | -4567 | SMARCA5        | -1641 | ST3GAL3      | 1805 | ENTHD2        | 6150 |
| HIT            | -10548 | CCDC91         | -7537 | MIR4745 /// I | -4566 | AGPAT5         | -1640 | ABCC13       | 1806 | BEST1         | 6156 |
| EIF3K          | -10547 | NHLRC3         | -7535 | CAMLG         | -4565 | C11orf57       | -1639 | DTD1         | 1807 | FGF3C3        | 6162 |
| LRRCA5         | -10546 | LEPRTL1        | -7534 | MIR949 /// N  | -4564 | AGFG1          | -1638 | RIN2         | 1811 | KSR1          | 6163 |
| GCN1L1         | -10545 | AASDHPTT       | -7533 | NXPX3         | -4563 | TK2            | -1637 | IGSCE2       | 1813 | MBP           | 6166 |
| HELLS          | -10544 | SMO1           | -7532 | ACTP1         | -4562 | CRAMP1L        | -1636 | MGC39584     | 1814 | PITBP3        | 6172 |
| ATPSL          | -10543 | LOC10192867    | -7531 | ZNF117        | -4561 | ARL6           | -1635 | MGLL         | 1815 | GULP1         | 6173 |
| TXNL4A         | -10542 | PPP2R4         | -7530 | H2AFY         | -4560 | PCM1           | -1634 | CYP2A6       | 1816 | ZNF71         | 6184 |
| APIS           | -10541 | TRNCR6B        | -7529 | ATP5E         | -4559 | DPPE           | -1633 | RNF185-AS1   | 1817 | RRBP1         | 6185 |
| LOC283693      | -10540 | DDX24          | -7528 | H2S2T1        | -4558 | MEX3B          | -1632 | SIGLEC7      | 1818 | PKPFB1        | 6193 |
| CNCG1          | -10539 | HEATR6         | -7527 | UBE2R2        | -4556 | TLL7           | -1631 | RN11-327J17  | 1819 | YFP1          | 6197 |
| UCKL1          | -10538 | DR6            | -7526 | CEP55         | -4555 | AKR1C2 /// U   | -1630 | AKR1C2 /// U | 1821 | CITA          | 6200 |
| MKR2N2         | -10537 | LCOR           | -7525 | CCDC40        | -4554 | TBCC           | -1629 | PITHD1       | 1823 | PON1          | 6214 |
| CSPP1          | -10536 | BORA           | -7524 | FAM210A       | -4553 | HNRNPD         | -1628 | NLRP3        | 1825 | TCER3         | 6219 |
| DYRK2          | -10535 | WWP2           | -7523 | SIRT1         | -4552 | SLC39A3        | -1627 | ZNF598       | 1826 | FAM182B /// G | 6226 |
| C11orf71       | -10534 | BZW1           | -7521 | LMO4          | -4551 | APC            | -1626 | MOCOS        | 1828 | ARSD          | 6246 |
| CALB1          | -10533 | ARL8B          | -7520 | FRMO21        | -4550 | PCCB           | -1625 | PMO2         | 1829 | ITGB6 /// LOC | 6247 |
| SM3            | -10532 | DNAAF3-AS1     | -7519 | DNAAF3        | -4549 | EXOC5          | -1624 | TRM67        | 1830 | MEX3C         | 6248 |
| TMEM132E       | -10531 | NM1            | -7518 | ASXL1         | -4548 | FAM201A        | -1623 | PEAK1        | 1831 | MEX3C         | 6249 |
| LOC10106039    | -10530 | ZNF347         | -7517 | TUBA1B        | -4547 | MSI2           | -1622 | CCDC80       | 1832 | TANC1         | 6254 |
| TUBG2          | -10529 | DYRK2          | -7516 | TMCO1         | -4546 | PEXSL          | -1621 | ORS1M1       | 1833 | MBTPS2        | 6257 |
| SDHB           | -10528 | SLC25A11       | -7515 | USP21         | -4545 | UBE3A          | -1620 | USD18        | 1834 | PPP1R3B       | 6260 |
| COX15          | -10527 | PTP4A1         | -7514 | BCLAF1        | -4544 | BEND5          | -1619 | KIP16B       | 1835 | NUDFC2 /// N  | 6263 |
| ZNF606         | -10526 | IPW3           | -7513 | STAMP         | -4543 | MOS            | -1618 | MCM4         | 1837 | HLA-DQB1      | 6277 |
| ALG3           | -10525 | PAK2           | -7512 | COL9A2        | -4542 | FZD3           | -1617 | AP5Z1 /// MI | 1838 | LATS2         | 6280 |
| POLR2B         | -10524 | TWY1           | -7511 | IDH3B         | -4541 | USP22          | -1616 | RAET1E       | 1842 | AFF4          | 6287 |
| PSMA1          | -10523 | STRN           | -7510 | TSEN2         | -4540 | XPR1           | -1615 | ITGB8-AS1    | 1843 | ERC1          | 6288 |
| TECP1          | -10522 | GNAZ           | -7509 | CEP70         | -4539 | TMEM148        | -1614 | IRF6         | 1845 | DDX31         | 6297 |
| C1orf43        | -10521 | RSRC2          | -7508 | PODXL2        | -4538 | MAP2K7         | -1613 | EXOG         | 1846 | AHNAK         | 6298 |
| IFIB           | -10520 | LOC10190624    | -7507 | FAM63A        | -4537 | ALOXE3         | -1612 | ALOXE3       | 1847 | EF4E          | 6306 |
| FAM53C         | -10519 | TAF1A          | -7506 | DANCR         | -4535 | NGDN           | -1611 | LINC00482    | 1848 | YPT47         | 6310 |
| BDH1           | -10518 | NDUF87         | -7505 | STXBPA        | -4534 | ERP44          | -1610 | ABCD4        | 1849 | CARD14        | 6320 |
| 42248          | -10517 | HIST1H4A ///   | -7504 | UST           | -4533 | TRAPPC13       | -1609 | ANGPT1       | 1850 | LINC01260     | 6323 |
| AD1            | -10516 | UBAP2L         | -7503 | DENR          | -4532 | MIB1           | -1608 | GLS          | 1851 | GINS2         | 6325 |
| CDKN2AIPNL     | -10515 | FAM120B        | -7502 | SMIM8         | -4531 | CSTF2          | -1607 | SFTPB        | 1853 | UPK18         | 6329 |
| GRB2           | -10514 | PRAF2          | -7501 | FAM63B        | -4530 | PCBQ2          | -1606 | FAMR2        | 1854 | MKR2N2        | 6330 |
| GDE1           | -10513 | FGFR1OP        | -7500 | GID8          | -4529 | MRR44A         | -1605 | INSL3        | 1855 | CTL2          | 6331 |
|                |        |                |       |               |       |                |       |              |      |               |      |

|              |         |             |           |             |           |             |             |             |             |              |           |          |
|--------------|---------|-------------|-----------|-------------|-----------|-------------|-------------|-------------|-------------|--------------|-----------|----------|
| RABL3        | -10476  | DPY19L4     | -7462     | MVB12B      | -4492     | PPP2CA      | -1567       | CSMD2-AS1   | 1902        | LZTS1        | 6463      |          |
| MDM4         | -10475  | TNPO1       | -7461     | CEP63       | -4491     | MRPL38      | -1566       | CBR3-AS1    | 1903        | METTL15      | 6464      |          |
| RP14         | -10474  | RNF126      | -7460     | LOC283731   | -4490     | ZFP3        | -1564       | PLSCR4      | 1904        | PLD1         | 6465      |          |
| INSG1        | -10473  | GATC        | -7459     | ANKRD18A    | -4489     | CDAB        | -1563       | FOXP3       | 1906        | ERN1         | 6466      |          |
| ASCC1        | -10472  | PHF20L1     | -7458     | PLAZG12A    | -4488     | CDAO1       | -1562       | UTRN        | 1907        | TGFB2        | 6470      |          |
| CCDC142      | /// I   | EXOSC6      | -7457     | KBTB07      | -4487     | RFCS        | -1561       | MLIP        | 1910        | PGPEP1       | 6474      |          |
| SLC16A7      | -10470  | GRM3        | -7456     | AP3D1       | -4486     | MAP15       | -1560       | LIF         | 1911        | ABCC3        | 6488      |          |
| CORO2B       | -10469  | ESRRB       | -7455     | SLC35D3     | -4485     | MED24       | /// MI      | -1559       | ATHL1       | 1912         | LOC339166 | /// 6495 |
| NUP37        | -10468  | HDX         | -7454     | CNR1        | -4484     | ZNF500      | -1558       | PPP1R12C    | 1913        | DEFB106A     | /// 6497  |          |
| FAM117B      | -10467  | NEM2        | -7453     | SETD1       | -4483     | SNF5        | -1557       | MYO11       | 1914        | GRP126       | 6498      |          |
| KDM6A        | -10466  | NBP3        | -7452     | SETD1A      | -4482     | SETD1       | -1556       | LOC10192894 | 1915        | PAPPA        | 6508      |          |
| DDR1         | /// MIR | MREG        | -7451     | MYH10       | -4481     | SNHG11      | /// SI      | -1555       | ZC3H13      | 1916         | FGFR1OP   | 6511     |
| GNAS         | -10463  | PDE7A       | -7450     | PSPC1       | -4480     | CPSE6       | -1554       | MYBPC3      | 1918        | PXYLP1       | 6512      |          |
| PDDC1        | -10462  | SCARB2      | -7449     | BCL11A      | -4479     | SRSF10      | -1553       | PTCRA       | 1919        | LRRFIP1      | 6531      |          |
| POIAG        | -10461  | MRPL43      | -7448     | BCOR        | -4478     | MTERF4      | -1552       | BC028670    | 1920        | LOC10192988  | 6533      |          |
| AAGAB        | -10459  | INTS6       | -7447     | GNCG        | -4477     | SMARCA4     | 1551        | LOC10192738 | 1921        | PPM1E        | 6537      |          |
| CCDC16       | -10458  | RPL35A      | -7446     | NRC04       | -4476     | CTOF55-LUC7 | -1549       | BC9L        | 1922        | TMEM213      | 6540      |          |
| PLEKH81      | -10457  | FKBP7       | -7445     | GN010       | -4475     | PIP4K2B     | -1548       | KRT223P     | /// 1923    | PMS2P3       | 6542      |          |
| RP11-119F7.5 | -10455  | FAM177A1    | /// -7444 | ZNF814      | -4474     | SEN2        | -1547       | ZNF583      | 1924        | ZBTB20       | 6544      |          |
| H3F3A        | /// H3  | NSUNS       | -7442     | UOCC1       | -4473     | CCDC112     | -1546       | SYNPR-AS1   | 1925        | SUB1         | 6545      |          |
| AZIN1        | -10452  | LAMTOR5     | -7441     | NCBP2       | -4472     | PCL0        | -1545       | CACNB1      | 1927        | PML          | 6546      |          |
| TA5L         | -10451  | DDX20       | -7440     | HNRNP1P3    | -4471     | SYNRRG      | -1544       | MKNK1       | 1928        | EH03         | 6553      |          |
| RP1-10012.1  | -10450  | GDC3        | -7439     | ELAC1       | -4470     | CRI         | 1930        | SLC2A14     | /// 5       | 6554         |           |          |
| ANKX2        | /// NH  | ZNF468      | -7438     | GP2         | -4469     | YIP6        | -1542       | CLDN23      | 1931        | ESR1         | 6555      |          |
| NHSL1        | -10448  | EZH1        | -7437     | XPMP3       | -4468     | NAA15       | -1541       | LOC441454   | 1932        | GSE1         | 6567      |          |
| GPC2         | -10447  | CCTS        | -7436     | SLTM        | -4467     | PAXIP1      | -1540       | APBB2       | 1933        | EHF          | 6573      |          |
| SCN3B        | -10446  | PIGP        | -7435     | DDX19B      | -4466     | TMM23       | /// T       | -1539       | SPATA13     | 1934         | ADCY1     | 6575     |
| BCKDHA       | -10445  | LOC10050654 | -7434     | ELOVL5      | -4465     | SLC36A4     | -1538       | LOC91548    | 1935        | BTN2A2       | 6578      |          |
| GPSM2        | -10444  | HDA3        | -7433     | ZNF195      | -4464     | ZNF195      | -1537       | TNFRSF14    | 1936        | NR4A3        | 6582      |          |
| UTP23        | -10443  | ASAP2       | -7432     | TADA2B      | -4463     | LINC00094   | -1536       | RORA        | 1937        | FLVCR2       | 6584      |          |
| RNF121       | -10442  | BT3         | -7431     | SLC43A3     | -4462     | ZNF107      | -1535       | ADAM9       | 1938        | GLS          | 6589      |          |
| INPP5F       | -10441  | DNAIB5      | -7430     | KDM3B       | -4461     | WDR92       | -1534       | DDIT4L      | 1940        | MCL1         | 6591      |          |
| SSBP2        | -10440  | LOC10050624 | -7429     | LINC00921   | /// -4460 | NFYB        | -1533       | NAA11       | 1941        | SNX19        | 6595      |          |
| MYO6         | -10439  | DLK2        | -7428     | MFS08       | -4459     | METAP2      | -1532       | MX2         | 1942        | HIFNT        | 6598      |          |
| PRDC1        | -10438  | MRPL3       | -7427     | GNAT1       | -4458     | ENOSCS      | -1531       | CDR1        | 1943        | NR4A1        | 6600      |          |
| TMEM168      | -10437  | STAR3NL     | -7426     | RAD51D      | -4457     | HNRNPULL1   | -1530       | LOC1009665  | 1946        | LINC00470    | 6601      |          |
| LOC10193032  | -10436  | TRMT13      | -7425     | USP8        | -4456     | UBE2D2      | -1529       | TMD4        | 1948        | G3BP1        | 6602      |          |
| C2orf24      | /// -   | BICD1       | -7424     | SEMA6A      | -4455     | TMEM107     | -1528       | RNF144A     | 1949        | FUJ1292      | 6607      |          |
| GPR19        | -10434  | NONO        | -7423     | BM11        | /// CON   | -4454       | ZNF45       | -1527       | LOC10192988 | 1950         | WWP2      | 6615     |
| ERI1         | -10433  | YBEY        | -7422     | HS017B1     | -4452     | NFATC2IP    | -1526       | DUSP1       | 1951        | CCD3         | 6616      |          |
| LOC4892L1    | -10432  | LOC10050731 | -7421     | LOC10050731 | -4451     | PRSS5       | -1525       | PRSS5       | 1952        | LOC10050731  | 6620      |          |
| TPMT         | -10431  | LAMTOR2     | -7420     | PET100      | -4450     | PTEN        | -1524       | SNORD8      | 1953        | MAGL1        | 6623      |          |
| LOC554206    | -10430  | CBLL1       | -7419     | DDOST       | -4449     | NAP1L1      | -1522       | LOC10192731 | 1954        | KCNJ5        | 6624      |          |
| ZNF79        | -10429  | GRPEL1      | -7418     | LMBR1       | -4448     | DNAJC18     | -1521       | FDPSP2      | 1955        | KRT10        | 6625      |          |
| SLC35C2      | -10428  | SUPT6H      | -7417     | C8orf76     | -4447     | CPLX1       | -1520       | APOL1       | 1957        | TM6SF2       | 6634      |          |
| GRPEL1       | -10427  | BOLA2       | /// LOC   | -7416       | TMM21     | -4446       | DCHS1       | -1519       | ZNF44       | 1958         | CHD6      | 6637     |
| PKF3C        | -10426  | ZNF445      | -7415     | EZR         | -4445     | MIRN723     | /// I       | -1518       | ANKRD20A12  | 1959         | FOSL2     | 6641     |
| SYT11        | -10425  | CSBP1       | -7414     | USP11       | -4443     | TPX2        | -1517       | CNGB3       | 1960        | LURAP2       | 6645      |          |
| CDS2         | -10424  | EXTL2       | -7413     | LARP1B      | -4442     | CNT1        | -1516       | LOC10192973 | 1961        | DNAND2C      | 6653      |          |
| ABHD11       | -10423  | GTZF2H5     | -7412     | RIT1A       | -4441     | RNASEH1     | -1515       | BTNL9       | 1962        | RNF170       | 6664      |          |
| RP11-365H22  | -10422  | BTG3        | -7411     | SLMO2       | -4440     | DTYMK       | -1514       | AZMP1       | 1963        | DNM305       | 6668      |          |
| ASK11        | -10421  | YWHAE       | -7410     | LOXL3       | -4439     | KIF18A      | -1513       | AC005592.3  | 1965        | BCL2L14      | 6670      |          |
| MRP512       | -10420  | DPH2        | -7409     | EIF4ENF1    | -4438     | GALPP1      | -1512       | APOL2       | 1967        | PCBP1-AS1    | 6674      |          |
| RP11-9502.1  | -10419  | MYO15A      | -7408     | DNAJC1      | -4437     | SAP90       | -1511       | IL17RC      | 1968        | CASD1        | 6676      |          |
| MYO19        | -10418  | COX15       | -7407     | MFF         | -4436     | XKCC6       | -1510       | KRT83       | 1970        | HLA-DP81     | 6678      |          |
| RING1        | -10417  | WRN         | -7406     | B3GALT6     | -4435     | MFAP1       | -1509       | DG599616    | 1971        | MEK3         | 6689      |          |
| CCDC47       | -10416  | SYNE1       | -7405     | STX2        | -4434     | TXNDC16     | -1508       | DLEC1       | 1972        | PPP1R12B     | 6694      |          |
| APPL1        | -10415  | CSNK1G1     | -7404     | TMEM201     | -4433     | CDKN3       | -1507       | LOC10192755 | 1973        | SFTPB        | 6702      |          |
| HNRNP27      | /// -   | CCDC43      | -7403     | LOC10013021 | -4432     | CHD1        | -1506       | ANXA8       | /// AH      | 1975         | PLD1      | 6704     |
| BCL2L24      | -10414  | LRWD1       | -7402     | USP42       | -4431     | LSM4        | -1505       | LOC1010606  | 1976        | LSM4         | 6708      |          |
| LYP1A1       | -10412  | TMEM121     | -7401     | RPL31       | -4430     | ZNF653      | -1504       | PTPN11      | 1977        | PWWP2A       | 6709      |          |
| DNAJ2        | -10410  | URB1        | -7400     | NIPAL3      | -4429     | CCT6A       | -1503       | FKBP18      | /// M       | 1978         | CASC4     | 6714     |
| ZMYM5        | -10409  | ZNF790-AS1  | -7399     | CDC25A      | -4428     | CSNK1G3     | -1502       | SH3BP5      | 1978        | HFE          | 6716      |          |
| TMEM161B-A   | -10408  | SEZ6L       | -7398     | OLA1        | -4426     | BRD8        | -1501       | GNPTAB      | 1983        | TBX6         | 6732      |          |
| MYBBP1A      | -10407  | PTK2        | -7397     | PCNP        | -4425     | RHOT1       | -1500       | LINC00967   | 1984        | CYP3A4       | 6742      |          |
| MYO10        | -10406  | APX2        | -7396     | LOC10208921 | -4424     | ARID2       | -1499       | SRRM4       | 1985        | CF3          | 6743      |          |
| ERL1         | -10405  | FAR1        | -7395     | GANAB       | -4423     | SNW1        | -1498       | ACTR3BP2    | /// 1986    | CYP2A6       | 6750      |          |
| MKKS         | -10404  | MID1        | -7394     | ZNF747      | /// Z1    | -4422       | RP11-539L10 | -1497       | ANO7        | 1987         | COG2      | 6752     |
| ZNF669       | -10403  | ATAD3A      | /// A     | -7393       | NEFL      | -4421       | R81CC1      | -1496       | CD44        | 1988         | FCRL2     | 6758     |
| CL7orf89     | -10402  | PPM1L       | -7392     | CLC1        | -4420     | CNOT7       | -1495       | RP11-44014  | 1989        | NOTCH2       | 6759      |          |
| PRKAA2       | -10400  | PCDD11      | -7391     | ZNF814      | -4419     | TMEM170B    | -1493       | BTNSA1      | 1991        | ASPH         | 6771      |          |
| PF1F1        | -10399  | KIAA1429    | -7390     | AD18        | -4418     | TRAF3IP2    | -1492       | RFC4        | 1993        | LOC1005099   | /// 6849  |          |
| TP1          | -10398  | ADAL        | -7389     | GNAT1       | -4417     | JADE1       | -1491       | OR8G1       | 1995        | DNFZ3P4K02   | 6791      |          |
| RFSD         | -10397  | MRPL2       | -7388     | LOC10192984 | -4416     | TIA1        | -1489       | RNASEL      | 1996        | DLEU2        | 6792      |          |
| TPV23B       | -10395  | PI4A        | -7387     | YWHAQ       | -4415     | AKIRIN2     | -1488       | MED12L      | 1998        | ZNF443       | 6800      |          |
| KBTBD2       | -10394  | PDE6D       | -7385     | C10orf2     | -4414     | TMED8       | -1487       | TRIM29      | 1999        | E1F1B-AS1    | 6801      |          |
| FBX09        | -10393  | MTIF2       | -7384     | SRR7        | -4413     | ZMYND19     | -1486       | EMW1        | 2000        | MCFL2        | 6802      |          |
| ACTR5        | -10392  | PRK2        | -7383     | SRRM4       | -4412     | LBRC40      | -1485       | LOC10192881 | 2002        | ITIH4        | 6810      |          |
| ANAPC5       | -10391  | SORD        | -7382     | IPP         | -4411     | DPS1        | -1484       | RHGG        | 2003        | TRPC4        | 6813      |          |
| MESDC1       | -10390  | BRW01       | -7381     | STK32C      | -4410     | VP55        | -1483       | KRT84       | 2006        | ZNF160       | 6817      |          |
| TAX1BP1      | -10389  | SMEK1       | -7380     | COX5A       | -4409     | WBP11       | -1482       | LOC10013444 | 2007        | SFB2         | 6819      |          |
| GNBP2        | -10388  | DERA        | -7379     | C16orf52    | /// -4408 | TRAPPC11    | -1481       | IRG1        | 2009        | CACUL1       | 6827      |          |
| PHKG2        | -10387  | PODAP1      | -7378     | GATS        | -4407     | PRMT5       | -1480       | IL16        | 2011        | MIR6883      | /// F     | 6828     |
| FGFR1OP2     | -10386  | RNF528      | -7377     | SENP6       | -4406     | ELP6        | -1479       | TRAF3IP2    | 2013        | OGFR         | 6840      |          |
| PLA4         | -10385  | ATG13       | -7376     | RPL17       | -4404     | ANKK5       | -1478       | ANKK5       | 2014        | LOC1005099   | /// 6849  |          |
| RABL8        | -10384  | SDCCAG3     | -7375     | SEAC1       | -4403     | GNB5        | -1477       | REGL1       | 2016        | TRIM10       | 6850      |          |
| DAZAP1       | -10383  | METTL5      | -7374     | MED28       | -4402     | KIF3C       | -1475       | LINC00470   | 2017        | RBM47        | 6851      |          |
| SNRPA1       | -10382  | MTERF1      | -7373     | FBX15       | -4401     | SLC25A46    | -1474       | TRIM69      | 2019        | LY9          | 6857      |          |
| RUNDC3A      | -10381  | EP300       | -7372     | CNOT2       | -4400     | FOXK2       | -1473       | HIST1H3E    | 2020        | PARP10       | 6858      |          |
| ABT1         | -10380  | RAB27       | -7371     | PHF20L1     | -4399     | SRSF1       | -1472       | CFTR        | 2021        | UBE2Z        | 6861      |          |
| ELYR1        | -10379  | YAFI4133A   | /// -7370 | YAFI4133A   | -4398     | TKI         | -1471       | ERVH4       | 2024        | G871         | 6874      |          |
| ADSSL1       | -10378  | LOC129680   | -7369     | BRD7        | -4397     | HCG18       | -1470       | LOC1019287C | 2026        | EVG8         | 6879      |          |
| KDM4C        | -10377  | SAV1        | -7368     | ST7L        | -4396     | DTL         | -1468       | ITPKB       | 2028        | SSX2         | /// SSX2  | 6881     |
| MBNL3        | -10376  | NUCKS1      | -7367     | TCF3        | -4395     | CNT2        | -1467       | LOC145474   | 2029        | PAX8         | 6886      |          |
| SYNRG        | -10375  | STK17B      | -7366     | MIEF1       | /// OVC   | -4394       | MIEF1       | -1466       | KRTAP7-1    | 2030         | PAIP2     | 6892     |
| OSBP18       | -10374  | TNPO2       | -7365     | RUNX1T1     | -4393     | KULH23      | -1465       | ADCY3       | 2033        | CNXL4        | 6896      |          |
| ANAPC5       | -10373  | PCX19       | -7364     | ORX2        | -4392     | DPF4        | -1464       | TGFA        | 2034        | LOC41        | 6897      |          |
| NARR         | /// RAB | SK2         | -7363     | WDRASB      | -4391     | ORC6        | -1463       | SDHD        | 2035        | PMSD6-AS2    | 6899      |          |
| LOC644172    | /// -   | DNAJC27     | -7362     | UBR3        | -4390     | NUDC        | -1462       | DSC2        | 2036        | DDX28        | 6900      |          |
| ABHD2        | -10370  | PAXBP1      | -7361     | SLC20A1     | -4389     | GLTSCR1L    | -1461       | FLJ40288    | 2037        | HKR1         | 6907      |          |
| LINC01128    | -10369  | TOR1B       | -7360     | KMT2A       | -4388     | CHTOP       | -1460       | PLEKHG1     | 2038        | MGEA5        | 6920      |          |
| COLCA2       | -10368  | WDRF3-AS2   | -7359     | LINC7       | -4387     | LRP12       | -1459       | TRPC4       | 2039        | TRAF3IP2-AS1 | 6926      |          |
| CHST7        | -10367  | ASMTL       | -7358     | TRAF3       | -4386     | QUB3        | -1458       | QUB3        | 2040        | SARDH        | 6927      |          |
| Clorf21      | -10366  | RBK4        | -7357     | KIAA2013    | -4369     | JMY         | -1445       | STEAP4      | 2060        | VSTM4        | 6932      |          |
| SMU1         | -10365  | ROBO2       | -7356     | TMEM132A    | -4382     | ASAH2B      | -1456       | TMEM127     | 2042        | GYPB         | 6935      |          |
| TMM23        | /// T   | RDH11       | -7355     | TMM23       | -4381     | CCAR2       | -1455       | IDS         | 2043        | WWP2         | 6949      |          |
| NOP10        | -10363  | LOC10013431 | -7354     | SRR         | -4379     | TNPO1       | -1454       | LOC10192815 | 2046        | MTEM108      | 6952      |          |
| ZDC          | -10362  | TA1F5       | -7353     | LMO1        | -4378     | SENP6       | -1453       | LOC10192882 | 2047        | TRIQK        | 6956      |          |
| GAD45G       | -10361  | FNAR1       | -7352     | SEB2        | -4376     | SASS6       | -1452       | SLC16A5     | 2048        | HTR          |           |          |

|               |        |               |       |               |       |                |       |               |      |                |      |
|---------------|--------|---------------|-------|---------------|-------|----------------|-------|---------------|------|----------------|------|
| CADPS         | -10323 | DGCR6 /// DG  | -7314 | BAGE          | -4338 | KPNB1          | -1413 | SYNPO2        | 2103 | TNFAIP3        | 7139 |
| ATP2B1        | -10322 | CNNM3         | -7313 | SNX4          | -4337 | CUL5           | -1412 | TM6C          | 2104 | MNF8           | 7155 |
| PHKB          | -10321 | PER3          | -7312 | PCMT1         | -4336 | ZNF32          | -1411 | STM1          | 2105 | CLDN18         | 7157 |
| CHTF48        | -10320 | ZNF583        | -7311 | RNF38         | -4335 | RAD1           | -1410 | CCDC68        | 2106 | NR6A1          | 7166 |
| GNAS          | -10319 | AHCY          | -7310 | SH3           | -4334 | CREZF2         | -1409 | CA12          | 2107 | LINC01138      | 7184 |
| SAP30BP       | -10318 | RPS23         | -7309 | IFT52         | -4333 | PRIMPOL        | -1408 | MRO           | 2108 | DSTYK          | 7195 |
| VDAC1         | -10317 | DNAJC5        | -7308 | C5orf24       | -4332 | DIABLO         | -1407 | RBMA7         | 2109 | BMP1           | 7202 |
| TECAL3        | -10316 | RRP15         | -7307 | UBE2E3        | -4331 | ZNF623         | -1406 | SWAP70        | 2110 | TBRG1          | 7204 |
| RRAGA         | -10315 | PPOX          | -7306 | BZWI          | -4330 | ARRP19         | -1405 | LAMA1         | 2111 | BN1            | 7206 |
| ISRW7         | -10314 | TRAF1         | -7304 | TRAF1         | -4329 | TRAF1          | -1404 | TMEM115       | 2112 | PRP1           | 7210 |
| PH1D2         | -10313 | TOML1L        | -7303 | ARPC5L        | -4328 | C13orf48 ///   | -1403 | TMEM165       | 2113 | ACPP           | 7221 |
| DYX1C1 /// D  | -10312 | COX11         | -7302 | RP11-819C21   | -4327 | CELSR3         | -1402 | LOC1019277C   | 2116 | BAGE           | 7224 |
| SLC39A4       | -10311 | GORAB         | -7301 | BRWD1         | -4326 | MDP1 /// NEC   | -1401 | PDE1A         | 2119 | ACE2           | 7234 |
| MIR6805 /// I | -10309 | LOC10192908   | -7300 | MED17         | -4325 | GART           | -1400 | LOC1002916C   | 2120 | ZNF568         | 7243 |
| HNRNPK        | -10308 | PTP4A1        | -7299 | RYBP          | -4324 | C15orf37       | -1399 | FGFR1L        | 2121 | C11orf54       | 7247 |
| LOC45783 ///  | -10307 | PTPM4         | -7298 | ANKRD60       | -4323 | PKL1           | -1398 | CTNS          | 2122 | HDCAC          | 7248 |
| MGC52722      | -10306 | ZNF106        | -7297 | SNW1          | -4322 | HSPD1          | -1397 | ORAF16 /// O  | 2123 | UBE2H          | 7254 |
| OSBP16        | -10305 | PREDL2        | -7296 | INORCO        | -4321 | TENM4          | -1396 | EPN1          | 2124 | RTFDC1         | 7255 |
| AK2           | -10304 | WDR53         | -7295 | CYCS          | -4320 | VRK1           | -1395 | SLC17A9       | 2129 | KIF13A         | 7258 |
| TULP4         | -10303 | KDM4B         | -7294 | PLCL2         | -4319 | PNN            | -1394 | FGFR2         | 2131 | DSC2           | 7259 |
| PHF20L1       | -10302 | AP1S1         | -7293 | MANEA         | -4318 | C9orf40        | -1393 | S1PR2         | 2132 | H6PD           | 7261 |
| RAB2A         | -10301 | SFT103 /// WI | -7292 | DDX18         | -4317 | KNOP1          | -1392 | RAB30         | 2133 | MYB1           | 7266 |
| MIR5132 /// I | -10300 | PRPF4B        | -7291 | LRNP2         | -4316 | NAA38          | -1391 | PAK2A         | 2134 | HFE            | 7276 |
| CTC44AN24.1   | -10299 | SENPE         | -7290 | HMGCS1        | -4315 | NSL1           | -1390 | GUCY2C        | 2135 | DSC3           | 7278 |
| MIRPL44       | -10298 | NSUN5         | -7289 | PRPF4B        | -4314 | BID            | -1389 | PNNAL2        | 2136 | ADARB1         | 7279 |
| ATG13         | -10297 | DR1           | -7288 | TRAF3P1       | -4313 | APL1           | -1388 | RP11-1151B1   | 2137 | HAB1           | 7281 |
| NUDT21        | -10296 | KRT8          | -7287 | CHAMP1        | -4312 | RSL24D1        | -1387 | TSPYL6        | 2139 | ITGB6 /// LOC  | 7284 |
| VPS13A        | -10295 | UG4           | -7286 | C7orf50       | -4311 | LAMTOR3        | -1386 | DKF2P434L19   | 2140 | EREK           | 7285 |
| TTC37         | -10293 | GXYL1         | -7285 | HMG83         | -4310 | WDR35          | -1385 | UPH           | 2141 | WDR21          | 7289 |
| KNB1          | -10292 | AHSA1         | -7284 | ZNF407        | -4309 | CDC43          | -1384 | COX3A         | 2142 | COX18          | 7290 |
| PCDH83        | -10291 | CIQB9         | -7283 | POLR3A        | -4308 | LINC00909      | -1383 | CTSLP8        | 2143 | POLR3K         | 7293 |
| HRSF12        | -10289 | DHRS4-AS1     | -7282 | DROSHA        | -4307 | RAD1           | -1382 | LOC1005070C   | 2144 | CLUAP1         | 7295 |
| RDH11         | -10288 | FBOZ28        | -7281 | SHE           | -4306 | GSK3B          | -1381 | PTK6          | 2146 | CDH6           | 7296 |
| COX6C         | -10287 | KDM6B         | -7280 | LSG1          | -4305 | EIF3F          | -1380 | LOC10192825   | 2148 | LOC10050585    | 7297 |
| ADH5          | -10286 | CK2AP1        | -7279 | ZWIM2         | -4304 | PHYHIP1        | -1379 | ZFP36L2       | 2150 | 3877           | 7301 |
| TMEM104       | -10285 | CCDC138       | -7278 | ATF2          | -4303 | EFCAB7         | -1378 | FAM71A /// F  | 2151 | CA12           | 7303 |
| KAA0907       | -10284 | VAMP2         | -7277 | SFA1          | -4302 | CBFA2T2        | -1377 | ITGBL1        | 2152 | CD300LG        | 7304 |
| CBLN2         | -10283 | ZNF471        | -7276 | GIC1          | -4301 | SLCO3A1        | -1376 | PAPOLG        | 2153 | ARID1B         | 7310 |
| RP11-75C9.1   | -10282 | TNPO1         | -7275 | MDM1          | -4300 | HOOK1          | -1375 | AKO21804      | 2154 | ASPH           | 7312 |
| SMXK1         | -10281 | YCL5          | -7274 | SCMH1         | -4299 | FAM161B        | -1374 | PRX           | 2155 | CASP19         | 7316 |
| CCKAG8        | -10280 | FAM175A       | -7273 | CHP1          | -4298 | SET7 /// SETPA | -1373 | av2131 /// TR | 2156 | WRNIP1         | 7317 |
| PAKG          | -10279 | YY1           | -7272 | LOC10106061   | -4297 | CTSF3          | -1372 | ICOSLG        | 2157 | ZSCAN12        | 7329 |
| CSR2          | -10278 | SERTAD4       | -7271 | MAP3K9        | -4296 | PIRG1          | -1371 | KCNQ4         | 2158 | EGFR           | 7330 |
| GID4          | -10277 | FAR1          | -7270 | LOC284014     | -4295 | ARID1B         | -1370 | NEUROD4       | 2160 | ITGB2-AS1      | 7333 |
| SLC16A1       | -10275 | MLF1          | -7269 | PDCD5         | -4294 | BANF1          | -1369 | ELL           | 2161 | SPTLC3         | 7340 |
| SDOP          | -10274 | CCDC88A       | -7268 | METTL21A      | -4293 | MELK           | -1368 | NHPH1         | 2163 | ERN1           | 7341 |
| FAM122C       | -10273 | TTC9          | -7267 | CHP2          | -4292 | RBM27          | -1367 | IFITD1        | 2166 | ANTR1          | 7346 |
| PSK2          | -10272 | AKIRIN1       | -7266 | POLR3B        | -4291 | DEUCO          | -1366 | CCDC88B       | 2167 | NIN            | 7347 |
| VASH2         | -10271 | STX17         | -7265 | LOC1019280C   | -4290 | EMC1           | -1365 | HERC2P7       | 2168 | USP22          | 7350 |
| GLR8          | -10270 | RAB11FIP3     | -7264 | METTL4        | -4289 | FAM19A5        | -1364 | SPAM1         | 2169 | ORA2A20P /// C | 7351 |
| RNF24         | -10269 | PSMB2         | -7263 | LSM8          | -4288 | PRPF19         | -1363 | MVK           | 2170 | IRF6           | 7356 |
| SLC25A10      | -10268 | ZNF883        | -7262 | ZNF736        | -4286 | MCM5           | -1362 | LRRCL1        | 2172 | CASP10         | 7361 |
| RIFDC1        | -10267 | SERBP1        | -7261 | NUD16         | -4286 | PHF19          | -1361 | DAB2IP        | 2173 | NTRK2          | 7376 |
| WIP2          | -10266 | UBR2L1        | -7260 | ZNF182        | -4285 | KIAA0232       | -1360 | FAM107A       | 2174 | SCC5A1         | 7377 |
| GRAMD1B       | -10265 | NARR /// RAB  | -7259 | PAFAH1B2      | -4284 | COQ10A         | -1359 | DDX52         | 2175 | RHO            | 7382 |
| PCCD4-AS1     | -10264 | TRIM32        | -7258 | CTD-3025N2C   | -4283 | MPHOSPH9       | -1357 | STEAP2        | 2176 | NPAS2          | 7383 |
| RLTRP         | -10263 | MTDH          | -7257 | EIF1          | -4282 | ORCS           | -1356 | EHD2          | 2177 | RP11-443B7.1   | 7401 |
| TRMT1L        | -10262 | POLR3F        | -7256 | MMX1-AS1      | -4281 | ARMC8          | -1355 | RAX           | 2178 | PDGFB          | 7404 |
| VWASB2        | -10261 | TMEM218       | -7255 | MYB           | -4280 | ATAD2          | -1354 | CPNE7         | 2179 | FAM20A         | 7406 |
| GPC5          | -10260 | PRPF8         | -7254 | DMRP1         | -4279 | ANKRD16        | -1353 | LOC102881179  | 2180 | TRM43 /// TR   | 7409 |
| YIP4          | -10259 | YIP4          | -7253 | DLAT          | -4278 | TIPRL          | -1352 | NR6A1         | 2181 | GRP113         | 7420 |
| FAM49B        | -10258 | OBSL1         | -7252 | TIFA          | -4277 | GTSE1          | -1351 | RNF133        | 2182 | SLC12A3        | 7423 |
| RMDN1         | -10256 | RNF41         | -7251 | CHD6          | -4276 | STMN3          | -1350 | LOC10050581   | 2183 | PDE4AD         | 7445 |
| NF2           | -10255 | CREB1         | -7250 | ERC6G /// ER  | -4275 | ZBTB8A         | -1349 | PTBP3         | 2185 | ITGB8          | 7446 |
| LOC10106074   | -10254 | LOC10050624   | -7249 | TMEM97        | -4274 | EXOC8          | -1348 | CCDC154       | 2186 | PA3            | 7452 |
| RNMT          | -10253 | SRSF1         | -7248 | ATAD2         | -4273 | PVAL1          | -1347 | SLC12A2       | 2187 | SLC5           | 7455 |
| CLGALT1       | -10252 | GPM2M         | -7247 | ZNF844        | -4272 | WHSC1          | -1346 | SLC25A24      | 2188 | HOPX           | 7458 |
| TIAL1         | -10251 | SETDB2        | -7246 | SMARCC1       | -4271 | TUBGCP4        | -1345 | ADAM30        | 2189 | NEDD9          | 7462 |
| OGDHL         | -10250 | IKBP1         | -7245 | RPL18A /// S1 | -4270 | CMAS           | -1344 | LIMS3-LOC44   | 2190 | TENM1          | 7470 |
| LOC645166 /// | -10249 | RBBP7         | -7244 | PLEKH6A       | -4269 | CCDC15         | -1343 | TMEM252       | 2191 | CAPN13         | 7472 |
| IK /// TMC06  | -10248 | UNC13A        | -7243 | CUJ2          | -4268 | SEC8BP2        | -1342 | LOC10192955   | 2192 | FHADI          | 7474 |
| NRF126        | -10247 | SLC22A10      | -7242 | WDR68B        | -4266 | RNASEH1        | -1341 | VPSB          | 2193 | RHAG3          | 7483 |
| AMIGO2        | -10246 | TXLID         | -7241 | ZBED3         | -4265 | H525T1         | -1340 | IT8B          | 2194 | KIF1A          | 7487 |
| DNAJC11       | -10245 | ZMPSTE24      | -7240 | SRPK2         | -4264 | NULP1          | -1339 | HUNK          | 2195 | TMEM229B       | 7494 |
| GPSM2         | -10244 | TECPR2        | -7239 | AGGF1         | -4263 | ZNF207         | -1338 | PLG           | 2196 | DOR2           | 7495 |
| LRR4C         | -10243 | CHN2          | -7238 | OSBP1L1       | -4262 | LYRM7          | -1337 | FBOXO39       | 2197 | RHOJ           | 7496 |
| ATF7IP        | -10242 | TLL7          | -7237 | TMEM106B      | -4261 | RNPS1          | -1336 | C16orf84      | 2198 | NHPH3-AS1      | 7497 |
| RPS-930J4.4   | -10241 | CHOP40B       | -7236 | ADAM1         | -4260 | AC088431       | -1335 | AC088431      | 2199 | CACIN1         | 7503 |
| DYRK2         | -10240 | TP11          | -7235 | VPS33A        | -4259 | GEN1           | -1334 | SOX17         | 2201 | ATP2A3         | 7507 |
| ARHGDA3       | -10239 | HDAC2         | -7234 | MORF4L1       | -4258 | SCAF8          | -1333 | BEND7         | 2203 | DNAH12         | 7515 |
| HOOK1         | -10238 | PMS2P1        | -7233 | KIF18B        | -4257 | RUVBL2         | -1332 | SLC7A8        | 2206 | CEP112         | 7518 |
| OTUD4         | -10237 | RGSS5         | -7232 | CHST8         | -4256 | ZC3H8          | -1331 | RP11-255A11   | 2207 | TSSK6          | 7522 |
| CDYL          | -10236 | TMEM192       | -7231 | KCTD13        | -4255 | SIN3A          | -1330 | FAM71A        | 2208 | PNKD           | 7528 |
| MLL13         | -10235 | PTPLB         | -7227 | ZMYM1         | -4254 | WDR54          | -1329 | ZNF3          | 2210 | NUP98          | 7532 |
| TBC1D102      | -10234 | FAM69B        | -7226 | SLC12A7       | -4253 | GRP1           | -1328 | CEACAM3       | 2211 | STX10          | 7538 |
| MLL14         | -10233 | SFMBT1        | -7225 | GKAP1         | -4252 | BSB7           | -1327 | C21orf15 ///  | 2212 | DUSP8 /// LOC  | 7540 |
| RP11-341N2.1  | -10232 | GNAQ          | -7224 | ZHK1          | -4251 | TIMM9          | -1326 | DIRC1         | 2213 | MIR4657 /// P  | 7549 |
| SETD4         | -10231 | GMPS          | -7223 | TUBD1         | -4250 | HKR1           | -1325 | CHD2          | 2214 | HOPX           | 7552 |
| MIRPL34       | -10230 | MED28         | -7222 | WAPAL         | -4249 | TMEM18         | -1324 | HYMA1         | 2215 | YEATS2         | 7561 |
| SFXN2         | -10229 | ZNF54         | -7220 | RTNAR         | -4248 | FAM19A5        | -1323 | ARHGAP29      | 2216 | APCDD1L-AS1    | 7572 |
| PPP6R1        | -10228 | LINGO2        | -7219 | CHN2          | -4247 | LINGO2         | -1322 | AC073283.7    | 2217 | ATP6V1D        | 7573 |
| TMEM151B      | -10227 | ENCUT2        | -7218 | RASA1         | -4246 | PNM2D2         | -1321 | EGOT          | 2220 | NFK            | 7579 |
| C14orf166     | -10226 | IKBP1         | -7217 | PAXBP1        | -4245 | AURKA          | -1320 | LINC00869     | 2222 | MLANA          | 7584 |
| DAAM1         | -10224 | LOC10028759   | -7216 | UQCCL1        | -4244 | DCLRE1B        | -1319 | RASSF4        | 2223 | SKIL           | 7587 |
| ATMIN         | -10223 | DDX18         | -7215 | SET /// SETSF | -4243 | ORC2           | -1318 | LOC10050641   | 2224 | MDFC           | 7614 |
| ZNF124        | -10222 | RUFY3         | -7214 | TUBGCP5       | -4242 | DRX7           | -1317 | CDI09         | 2226 | MMP8           | 7616 |
| C20orf24 ///  | -10221 | WDR61         | -7213 | RP11-799S9.9  | -4241 | ASNS           | -1316 | RP11-1151B1   | 2227 | CHERP          | 7617 |
| SDHC          | -10220 | RSAGA4        | -7212 | INSL1         | -4240 | ASNSD1         | -1315 | RP11-319G9.1  | 2228 | PDE1A          | 7627 |
| TNN3          | -10219 | RICTOR        | -7211 | COX5B         | -4239 | POLE3          | -1314 | F5CB          | 2229 | MCF2L          | 7631 |
| TRAF4         | -10218 | ZNF207        | -7210 | KCNH8         | -4238 | VEZT           | -1313 | LENEP         | 2230 | KLC3           | 7632 |
| GOT1          | -10217 | ATRN1L        | -7209 | SART1         | -4237 | RP11-16P6.1    | -1312 | KLF13 /// LOC | 2231 | JDP2           | 7633 |
| MIR101-1 ///  | -10215 | MUC1          | -7208 | SLC16A1       | -4236 | ZNF84          | -1311 | AKO5982       | 2232 | IRF4           | 7635 |
| MAP           | -10214 | PNW1          | -7207 | FMO6          | -4235 | QSOX1          | -1310 | DCM8          | 2233 | QSOX1          | 7643 |
| LRRCS9        | -10213 | B3GALNT1      | -7206 | IMP3          | -4234 | SLSLD1         | -1309 | IGHM8P2       | 2234 | CROT           | 7646 |
| ZNRF1         | -10212 | FSCN1         | -7205 | RAB16         | -4233 | NEFM           | -1308 | EF1B-AS1      | 2235 | NR1H4          | 7647 |
| CHRN81        | -10211 | MIAT          | -7204 | NAP1L1        | -4232 | BTF3L4         | -1307 | LPP           | 2236 | ZNF79          | 7650 |
| CDCE180 /// I | -10209 | FOD1          | -7203 | PDCD7         | -4231 | SNHG1 /// SN   | -1306 | NIPAL4        | 2237 | DENND4C        | 7651 |
| TCP10L        | -10208 | SPATLABL      | -7201 | LINC01003     | -4230 | ALYREF         | -1305 | ATP10A        | 2238 | CLP1           | 7653 |
| TAC3          | -10207 | ME2           | -7200 | ANKRD13C      | -4229 | TL             | -1304 | ICOSL5        | 2239 | ARHGAP29       | 7658 |
| ZFY           | -10206 | CCDC25        | -7198 | RASD2         | -4227 | ZNF268         | -1303 | RSPQ          |      |                |      |

|              |        |             |        |             |       |              |        |              |          |             |          |         |        |      |
|--------------|--------|-------------|--------|-------------|-------|--------------|--------|--------------|----------|-------------|----------|---------|--------|------|
| ZCHC14       | -10169 | ATP55       | -7162  | CRYZL1      | -4192 | PHTF2        | -1265  | RALGAP1      | ///      | 2290        | TAB3     | 7845    |        |      |
| UNKL         | -10168 | SNX16       | -7161  | C1orf86     | -4191 | MAPKAPK5     | -1264  | RG51         | 2291     | FOXP2       | 7855     |         |        |      |
| BBP1         | -10167 | CUL3        | -7160  | NBP2        | -4190 | EP5          | -1263  | NPAS3        | 2292     | RUFY2       | 7856     |         |        |      |
| CELSR2       | -10166 | MORC2       | -7159  | MRN9        | -4189 | ED4          | -1262  | SMIM20       | 2293     | HEPFC       | 7857     |         |        |      |
| DH3A         | -10165 | MAPK14      | -7158  | ST8SIA3     | -4188 | DNAIC9       | -1261  | CALD1        | 2294     | CELF1       | 7870     |         |        |      |
| DPY19L2      | -10164 | RNF27       | -7157  | PCM1        | -4187 | ZNF34        | -1260  | ERIC1-AS1    | 2295     | RHOJ        | 7871     |         |        |      |
| AHCYL1       | -10163 | GFHN        | -7156  | PTBP1       | -4186 | EID2         | -1259  | CCDC74A      | ///      | 2297        | EGFR     | 7876    |        |      |
| POLH         | -10162 | ETHN        | -7155  | DHX36       | -4185 | SSB          | -1258  | LOC10028906  | 2298     | ANTXR1      | 7880     |         |        |      |
| DBF4         | -10161 | ENSA        | -7154  | FXN         | -4184 | SCCPDH       | -1257  | CSF1         | 2299     | SAR1B       | 7881     |         |        |      |
| AKAP17A      | -10160 | PHF101      | -7153  | C1orf81     | -4183 | SNR38        | -1256  | C10orf128    | 2301     | SNAMD8      | 7883     |         |        |      |
| CDAC1        | -10159 | DENR        | -7152  | ARHGAP21    | -4182 | MAML3        | -1255  | RP123AP53    | 2302     | NPAS2       | 7886     |         |        |      |
| NSUN4        | -10158 | TMEM33      | -7151  | GL01        | -4181 | TMEM5        | -1254  | HGD          | 2304     | ZDHHC17     | 7888     |         |        |      |
| PLP2         | -10157 | SNX30       | -7150  | FKRP        | -4180 | SNRPA1       | -1253  | CALD1        | 2305     | RORA        | 7890     |         |        |      |
| EP515L1      | -10156 | KANSL3      | -7149  | CREBZF      | -4179 | CREB1        | -1252  | IFNA10       | 2306     | CDH19       | 7893     |         |        |      |
| SON          | -10155 | EVCC        | -7148  | VPS72       | -4178 | FBXO41       | ///    | LC           | -1250    | HSPA6       | 2307     | SMARCA2 | 7896   |      |
| SMARCC2      | -10154 | PDZD8       | -7147  | GAL3ST1     | -4177 | DND          | -1249  | LAMB2        | 2309     | RICTOR      | 7901     |         |        |      |
| KIAA0195     | ///    | SRS3        | -7146  | KHORS51     | -4176 | AP3B2        | -1248  | TRPC4        | 2310     | NEON        | 7904     |         |        |      |
| PEX5L        | -10152 | TNRC6B      | -7145  | POK1        | -4175 | INIP         | -1247  | ORS1L        | 2312     | CD9         | 7907     |         |        |      |
| SYT5         | -10151 | KCMF1       | -7144  | TBRI1M      | -4174 | PAXIP1-AS1   | -1246  | CPM          | 2314     | DCLK2       | 7911     |         |        |      |
| LOC10192827  | -10150 | TPD52       | -7143  | NFK1        | -4173 | LRPPRC       | -1244  | LINC01204    | 2316     | VIL1        | 7923     |         |        |      |
| LOC10334493  | -10149 | LOC10192871 | -7142  | CRPT        | -4171 | G3BP1        | -1243  | ARID1B       | 2317     | CYP2B6      | 7925     |         |        |      |
| SLC25A44     | -10148 | MPP6        | -7141  | HSP1A4      | -4170 | CSNK1G1      | -1242  | RNF213       | 2318     | SUPT20H     | 7926     |         |        |      |
| ZNF300B      | -10147 | KMT2B       | -7140  | UBA5        | -4169 | BTTF         | -1235  | C10orf101    | 2319     | BBS9        | 7930     |         |        |      |
| KLHL29       | -10146 | PRMT3       | -7139  | KRT20       | -4168 | NECAP1       | -1240  | ZNF385D      | 2320     | FAM153A     | ///      | 7933    |        |      |
| RANBP3       | -10145 | RANBP3      | -7138  | RABF1       | -4167 | HTRA2        | -1239  | FAM153A      | ///      | 2321        | PDGFRA   | 7935    |        |      |
| DAG1         | -10144 | HNRNP-AS1   | -7137  | LOC10050661 | -4166 | FAF1         | -1238  | SLC22A7      | 2322     | F5          | 7936     |         |        |      |
| KIAA0586     | -10143 | TMEM108     | -7136  | ZNF45       | -4165 | SOC55        | -1237  | LOC10099665  | 2323     | LDRAD4      | 7937     |         |        |      |
| UTP14A       | -10142 | MITS1L      | -7135  | POLE        | -4164 | TMEM57       | -1236  | THRB         | 2324     | TLTA        | 7944     |         |        |      |
| TNRC5B       | -10141 | AAMDC       | -7134  | IT74        | -4163 | BTTF         | -1235  | LOC10192888  | 2327     | BMX2        | 7945     |         |        |      |
| ZNF789       | -10140 | PRMT5       | -7132  | CEP76       | -4162 | DHX29        | -1234  | SLC2A9       | 2328     | TRAP        | 7948     |         |        |      |
| CRH1A        | -10139 | DDX49       | -7130  | FAM174B     | -4161 | HIP1         | -1233  | CEP128       | 2332     | CNTN1       | 7958     |         |        |      |
| TMEM259      | -10138 | GP2D        | -7129  | MREP516     | -4160 | AMN1         | -1232  | RASGRP2      | 2333     | IL6R        | 7963     |         |        |      |
| CEP57L1      | -10137 | THOC7       | -7128  | VAMP2       | -4159 | ZKSCAN2      | -1231  | COL12A1      | 2334     | APAF1       | 7964     |         |        |      |
| HOOR3        | -10136 | NUMA1       | -7127  | INTS12      | -4158 | MNS1         | -1230  | CWF19L2      | 2337     | GLB1L3      | 7975     |         |        |      |
| ZNF488       | -10135 | DHMD1       | -7126  | HDCX9       | -4157 | RAOC9        | -1229  | SPAG1A       | 2338     | JHUI6       | 7979     |         |        |      |
| WDR20        | -10134 | NRXN1       | -7125  | SIRT5       | -4156 | SMS          | -1228  | LAMB4        | 2339     | SNK5        | 7980     |         |        |      |
| OKSM         | -10133 | HNRNP11     | -7124  | FGFR2       | -4155 | BR13BP       | ///    | TH           | -1227    | LOC10192702 | 2340     | MMP19   | 7983   |      |
| RP11-31969.3 | -10132 | PARP11      | -7123  | ST3GAL3     | -4154 | BB57         | -1226  | KLF2         | 2342     | ENPP1       | 7985     |         |        |      |
| RANBP9       | -10131 | ZNF805      | -7122  | SLC25A14    | -4153 | INIP         | -1225  | SMOX         | 2343     | LOC10192713 | 7987     |         |        |      |
| ADRKB2       | -10130 | RAB38       | -7121  | SEPHS1      | -4152 | ANP32A       | -1224  | NME8         | 2344     | F7          | 7990     |         |        |      |
| PAM117A      | -10129 | IT10        | -4151  | LRP8        | -4151 | LRP8         | -1223  | CEP350       | 2345     | CNRP3       | 7993     |         |        |      |
| PPP6R3       | -10128 | ARHGAP32    | -7119  | SERTAD4     | -4150 | KFR30A       | -1222  | DNAH3        | 2346     | ANKRD36BP2  | 7999     |         |        |      |
| GABARAPL2    | -10127 | ATG12       | -7118  | BTBD3       | -4149 | MIEF1        | -1221  | TRIM58       | 2348     | GP2         | 8003     |         |        |      |
| ZNF385A      | -10126 | USP46       | -7117  | OCAD2       | -4148 | CDK1         | -1220  | HLA-DOB      | 2349     | GRAPL       | 8009     |         |        |      |
| JMJD6        | -10125 | THOC1       | -7116  | SNHG6       | ///   | SN           | -1417  | CNTRF-AS1    | 2350     | COL27A1     | 8021     |         |        |      |
| HIPK1        | -10124 | S5BP2       | -7115  | RAN52       | -4146 | MT54         | -1217  | MR6883       | ///      | 2377        | B3GALNT2 | 8022    |        |      |
| RIBC2        | -10122 | HAK1        | -7114  | IN15        | -4145 | IN15         | -1216  | RP5-800E16.2 | 2352     | CAT1        | 8025     |         |        |      |
| CACNA2D2     | -10121 | MDH2        | -7113  | CREZF7      | -4143 | DCUM105      | -1215  | FGD2         | 2357     | PSD4        | 8031     |         |        |      |
| RP57         | -10120 | BCL2L1      | -7112  | C7orf60     | -4142 | ZWINT        | -1214  | RP11-381L5.2 | 2359     | ITSN1       | 8032     |         |        |      |
| SLC25A4      | -10119 | NFATC2IP    | -7111  | RBM8A       | -4141 | GABRB3       | -1213  | GRB10        | 2361     | GB3         | 8043     |         |        |      |
| LRCH3        | -10118 | OSBP19      | -7110  | BRWD1       | -4140 | TIA1         | -1210  | SLC3A3       | 2362     | SP100       | 8045     |         |        |      |
| FER          | -10117 | HSPH1       | -7109  | LSM6        | -4139 | PK4          | -1209  | DMRTC1       | ///      | F           | 2365     | AQP3    | 8049   |      |
| POLR2J       | -10116 | NEK1        | -7108  | KFTN        | -4138 | CEK5         | -1208  | SLC7A8       | 2367     | BMPPR18     | 8050     |         |        |      |
| AKAP9        | -10114 | TIO1        | -7107  | NLRP1       | -4137 | RN3          | -1207  | JHDM1D-AS1   | 2378     | HAD1        | 8051     |         |        |      |
| CEP152       | -10113 | ATAD5       | -7106  | RABL6       | -4136 | ACTL6B       | -1206  | PENK         | 2370     | CELF2       | 8052     |         |        |      |
| CUL1         | -10112 | PSMD9       | -7105  | TMPO        | -4135 | SNRPB        | -1205  | CP51-IT1     | 2371     | PPP1R3B     | 8053     |         |        |      |
| SYMPK        | -10111 | CEP83       | -7104  | PNP1T       | -4134 | SLC36A4      | -1204  | KCNJ5        | 2372     | PPP1R12C    | 8055     |         |        |      |
| CHMP3        | ///    | RN          | -10110 | DYNLL2      | -4133 | MYT1         | -1203  | HECV1        | 2373     | ITGB3       | 8059     |         |        |      |
| PTPM20B      | -10108 | C1QTNF4     | -7102  | CCTFP3      | ///   | CC           | -1432  | CSE1L        | -1202    | MIR6883     | ///      | 2377    | SYNP20 | 8061 |
| GNA5         | -10107 | KMT2B       | -7101  | ZNF578      | -4131 | TMEM70       | -1201  | TMEM70       | 2378     | TMEM70      | 2378     | TMEM70  | 8063   |      |
| NDUFB1       | -10106 | TTIC3       | ///    | TTIC3       | -7100 | PDZD8        | -1200  | GEMIN2       | -1200    | AP000696.2  | 2379     | SIK1    | 8064   |      |
| APP          | -10105 | NEURL18     | -7099  | SRP72       | -4129 | PPM1G        | -1199  | RP11-471G13  | 2380     | OAF         | 8068     |         |        |      |
| ASPM         | -10104 | NEFH        | -7098  | MIF         | -4128 | RBM14-RBM4   | -1198  | LOC10192945  | 2385     | SP140L      | 8073     |         |        |      |
| BDNF         | -10103 | NAP11L      | -7097  | GN81        | -4127 | MRE11A       | -1197  | AK131021     | 2386     | BSND        | 8074     |         |        |      |
| DLC1E1C      | -10102 | AP3D1       | -7096  | SCAMP1      | -4126 | TMEM50       | -1196  | KIAA0368     | 2388     | LPAL2       | 8080     |         |        |      |
| ISPA4        | -10101 | ZNF211      | -7095  | SLC23A1     | -4125 | ACRO6        | -1195  | ACRO6        | 2389     | NOX1        | 8081     |         |        |      |
| THEM4        | -10100 | CSRP2BP     | ///    | P           | -7094 | WTAP         | -1194  | MGST3        | 2390     | INPP4B      | 8092     |         |        |      |
| EXOSC6       | -10099 | ZNF462      | -7093  | PARP1       | -4123 | DPY5L3       | -1193  | MAU2         | 2392     | PIP4K2B     | 8099     |         |        |      |
| COX16        | ///    | SV          | -10098 | ST7-AS1     | -7092 | SSX2IP       | -1192  | KIF2A        | -1192    | ACCS3       | 2393     | SPAG16  | 8107   |      |
| ATPGV11H     | -10097 | DUSP26      | -7091  | NDUFA11     | -4121 | ANLN         | -1191  | LOC10192985  | 2396     | TRIM38      | 8109     |         |        |      |
| MTMR9        | -10096 | CA9         | -7090  | ARMCX5-GPR  | -4120 | WDR9         | -1190  | KRR77        | 2397     | FERM1T1     | 8111     |         |        |      |
| NSIC1        | -10095 | RNF49C2     | -7089  | LOC10192922 | -4119 | LOC10192922  | -4119  | RAOR8        | 2398     | RNF43       | 8112     |         |        |      |
| GNAH1        | -10093 | LRP6        | -7088  | PHCL1       | -4118 | GFZ1         | -1188  | PNO1         | 2399     | RNF3        | 8114     |         |        |      |
| CRABP1       | -10092 | MLLT10      | -7087  | DACH1       | -4117 | SLC25A3      | -1187  | TMEM72-AS1   | 2400     | HKR1        | 8115     |         |        |      |
| TPM3         | -10091 | NUDT4       | -7086  | CDADC1      | -4116 | SMARCA5      | -1186  | ADAR81       | 2401     | TTIC3       | 8120     |         |        |      |
| ZF8          | -10090 | AKIRIN2     | -7085  | PTPRN2      | -4115 | CHEK1        | -1185  | EHMT2        | 2402     | PP6R2       | 8123     |         |        |      |
| NF324B       | -10089 | CEP68       | -7084  | EM1L        | -4114 | CEP63        | -1184  | TARDBP1      | ///      | 2403        | MMP16    | 8124    |        |      |
| ANAPC5       | -10088 | RNF418      | -7083  | LOC10192923 | -4113 | HNRNP18L     | -1183  | CAPN3        | 2404     | RASSF4      | 8183     |         |        |      |
| COAS         | -10087 | TFDP1       | -7082  | THEM6       | -4112 | NUP133       | -1182  | C10orf54     | 2405     | C22orf42    | 8141     |         |        |      |
| EFAE2        | -10086 | SETD9       | -7081  | IPO7        | -4111 | UBE2M        | -1181  | RARRES2      | 2407     | CAPN3       | 8142     |         |        |      |
| RBCK1        | -10085 | ZNF782      | -7080  | KANS1L      | -4110 | MRPL46       | -1180  | FAM120A      | 2408     | CXCL2       | 8157     |         |        |      |
| SUGT1        | -10084 | ST6GALNACA  | -7079  | TRIM33      | -4109 | ZNF747       | -1179  | ADAMT57      | 2409     | KLF8        | 8161     |         |        |      |
| MWP1B        | -10083 | RYPB        | -7078  | DENR        | -4108 | H2AFX        | -1178  | GAF2A        | 2411     | METTL20     | 8167     |         |        |      |
| WDR3         | -10082 | HNRNP1      | -7076  | C1orf43     | -4107 | TRIM23       | -1177  | IRF4         | 2412     | EMC10       | 8170     |         |        |      |
| COX6B        | -10081 | RAB39       | -7075  | LTO6        | -4106 | FAM173A      | -1176  | PLK3         | 2413     | PXK2        | 8172     |         |        |      |
| FAM133B      | ///    | 10080       | UBXN2B | -7073       | TUSC3 | -4105        | BUB1   | -1175        | HMG81P12 | 2414        | VSTM4    | 8174    |        |      |
| PRKAA1       | -10079 | ZNF518B     | -7072  | MEA1        | -4104 | MCM7         | -1174  | SLC24A4      | 2416     | PTGER3      | 8177     |         |        |      |
| GBF1         | -10078 | MED4        | -7071  | RLM         | -4103 | RACGAP1      | -1173  | TL2          | 2418     | OPA1        | 8184     |         |        |      |
| RP53A        | ///    | SN          | -10077 | NEFL        | -4102 | RBMX2        | -1172  | CD22         | 2419     | LOC731424   | 8185     |         |        |      |
| POLR1E       | -10076 | LSMR        | -7069  | COX5B       | -4101 | XPO5         | -1171  | CACNG6       | 2420     | NEK9        | 8186     |         |        |      |
| CEP50        | -10075 | KIF7        | -7068  | THAP2       | -4100 | RP11-498C9.1 | -1170  | LOC10192923  | 2422     | PRK11A      | 8204     |         |        |      |
| TIMM22       | -10074 | DLG4        | -7067  | HNRNP2A21   | -4099 | CNTND2       | -1169  | ILIRAP       | 2424     | PTP         | 8200     |         |        |      |
| PUS7L        | -10073 | TMEM10      | -7066  | IGF2BP3     | -4098 | TOP3A        | -1168  | RP11-663N22  | 2425     | FOSL2       | 8205     |         |        |      |
| MAN2A2       | -10072 | FAM226A     | ///    | 7065        | ATG9A | -4097        | PTRHD1 | -1167        | ZBTB20   | 2426        | LIMS1    | 8209    |        |      |
| MED13L       | -10071 | ANLN        | -7064  | DHRX        | -4096 | DTX3         | -1166  | EPX          | 2427     | SMUG1       | 8214     |         |        |      |
| RCDR3        | -10070 | KCTD18      | -7063  | RPRD1A      | -4095 | CBRA         | -1165  | SLC17A3      | 2428     | DOX58       | 8215     |         |        |      |
| RNF4         | -10069 | EHS1        | -7062  | ATXN7L3B    | -4094 | ATXN7L3B     | -1164  | ATXN7L3B     | 2429     | LOC3046     | 8220     |         |        |      |
| RPL22        | -10068 | EFLN2       | -7061  | SHARP1      | ///   | 5            | -4093  | ZBTB44       | -1163    | TNR         | 2430     | PTG     | 8224   |      |
| UBAC2        | -10067 | GAPVD1      | -7060  | PTMA        | -4092 | PRTFDC1      | -1162  | CA12         | 2431     | JAK3        | 8227     |         |        |      |
| PTPRZ1       | -10066 | SURF6       | -7059  | PANK4       | -4091 | KIF11        | -1161  | LOC10050682  | 2433     | SERPIN81    | 8235     |         |        |      |
| FRMD3        | -10065 | NOLC1       | -7058  | WDR36       | -4090 | SNAPCS       | -1160  | SPDR         | 2434     | IGSF3       | 8236     |         |        |      |
| CNO110       | -10064 | NAPPLD      | -7057  | RYPB        | -4089 | CPT2         | -1159  | ELF5         | 2436     | ASAP3       | 8249     |         |        |      |
| OCI0013070   | -10063 | ZNF431      | -7056  | CEP250      | -4088 | GICF2        | -1158  | DOCK5        | 2437     | TM6A16      | 8251     |         |        |      |
| RNF14        | -10062 | DDX28       | -7055  | NAE1        | -4087 | NUDT19       | -1157  | MDPC1        | 2440     | KIAA1217    | 8257     |         |        |      |
| OTUD3        | -10061 | DTD2        | -7054  | C1orf85     | -4086 | NCBP1        | -1156  | CCDC172      | 2441     | MIR6883     | ///      | F       | 8261   |      |
| CEP68        | -10060 | PARG        | -7053  | PBRM1       | -4085 | CBX5         | -1155  | RP1-142L7.8  | 2443     | SLAMF9      | 8264     |         |        |      |
| POLR3B       | -10059 | RNF170      | -7052  | SMEK2       | -4084 | DDX23        | -1154  | CSNK1E       | 2444     | WDR74       | 8270     |         |        |      |
| UQCRI1       | -10057 | ACAA2       | -7051  | H3F3A       | ///   | H3           | -4083  | NUPE2        | -1153    | D21S2088E   | 2446     | HECTD2  | 8271   |      |
| GAL2         | -10056 | WDR83       | -7050  | CKCA3       | -4082 | BAHC1        | -1152  | EGF-LAM-AS2  | 2447     | NTRK2       | 8278     |         |        |      |
| LOC10106018  | -10055 | ATP8B2      | -7049  | ALL11081    | ///   | 4081         | -1151  | ZNF286A      | -1151    |             |          |         |        |      |

|              |        |              |       |              |       |              |       |              |      |              |      |
|--------------|--------|--------------|-------|--------------|-------|--------------|-------|--------------|------|--------------|------|
| RBM18        | -10016 | KBTB08       | -7013 | PLCXD1       | -4045 | ZNF48        | -1115 | RASAL3       | 2493 | CEACAM6      | 8475 |
| FOXO2        | -10015 | NLN          | -7012 | MSH3         | -4044 | ZNF594       | -1113 | BHLHE40      | 2494 | MAGB3        | 8478 |
| WXC1         | -10014 | TUBBP5       | -7011 | PEX7         | -4043 | RBM8A        | -1112 | MFS012       | 2495 | NDST1        | 8481 |
| EP400NL      | -10013 | C9orf69      | -7010 | RHEB         | -4042 | METS         | -1111 | LOC10192902  | 2496 | LPPT1        | 8483 |
| EIF4E        | -10012 | C9orf69      | -7009 | LINC01420    | -4041 | C9orf114     | -1110 | SLIT2-IT1    | 2497 | SAE1         | 8489 |
| HMP19        | -10011 | RHEB         | -7008 | SERBP1       | -4040 | FAM1688      | -1109 | TBKBP1       | 2498 | ANGPTL4      | 8490 |
| OSL1         | -10010 | COG2IT1      | -7007 | HNRNP33      | -4039 | LRCH2        | -1108 | ZNF765       | 2499 | CERS5        | 8491 |
| TEX261       | -10009 | TUBA3C // TL | -7006 | ATO7H        | -4038 | PM20D2       | -1107 | ARMCX4       | 2500 | TNFRSF9      | 8494 |
| TFAM         | -10008 | FOXR         | -7005 | IPW // LOC1  | -4037 | CDK5R2       | -1106 | BC039357 //  | 2501 | ILIRN        | 8503 |
| GRM1DL       | -10007 | CDM3B        | -7004 | DCM3 // SL   | -4036 | LOC101302L   | -1105 | CMAMP        | 2502 | CHK3P1       | 8515 |
| FLJ3717      | -10006 | UDUFAF5      | -7003 | UBX1         | -4035 | DEK          | -1104 | IFTM1        | 2503 | ARRP21       | 8520 |
| DPB8         | -10005 | LOC10050731  | -7002 | THAP2        | -4034 | H2AFY2       | -1103 | ADAR2-AS1    | 2506 | BC027448     | 8521 |
| SEC11A       | -10004 | SPAT52       | -7001 | ZKSCAN1      | -4033 | STRBP        | -1102 | CKNIP2-AS1   | 2507 | LARP4        | 8522 |
| MORF4L1      | -10003 | LINC00657    | -7000 | ABCE1        | -4032 | HIRP3        | -1101 | INOB0C       | 2509 | AQP6         | 8525 |
| WBPA         | -10002 | GTFC1        | -6999 | WIZ          | -4031 | PIGU         | -1100 | BTN3A1       | 2510 | PHF20        | 8535 |
| EIF1         | -10001 | NUP1         | -6998 | GPAMP        | -4030 | CI2orf65     | -1099 | CC122        | 2511 | PRKCA        | 8550 |
| COQ3         | -10000 | PPP1R14B     | -6997 | BAG6         | -4029 | ZWILCH       | -1098 | PLIP         | 2513 | PDLIM5       | 8563 |
| ATP11B       | -9999  | DDX15A       | -6996 | AMOTL1       | -4028 | GEMINA       | -1097 | CGNL1 // LO  | 2515 | MZF1         | 8571 |
| KANSL1       | -9998  | SHMT2        | -6995 | FAM213A      | -4027 | FAIM         | -1096 | TTL3         | 2516 | TNFRSF9      | 8579 |
| JM1D4        | -9997  | PCMTD1       | -6994 | CELF1        | -4026 | CI4orf2      | -1095 | PVRL4        | 2520 | ZFP36L1      | 8584 |
| NFX1         | -9996  | MARPL15      | -6993 | LOC389906 // | -4025 | EID28        | -1094 | RP11-33301   | 2524 | LINC01004    | 8587 |
| PHK42        | -9995  | MAK16        | -6992 | UBTF         | -4024 | SCC57        | -1093 | CEBPB        | 2525 | TRPS1        | 8601 |
| PHF20L1      | -9994  | RSN1         | -6991 | RP12-486G15  | -4023 | SGOL2        | -1092 | CMAMP        | 2526 | TMEM106B     | 8602 |
| GDE1         | -9993  | PAHTM        | -6990 | ENK1D        | -4022 | NOLL1        | -1091 | OQSP2        | 2527 | TP63         | 8603 |
| KMT2A        | -9992  | ZNF677       | -6989 | ATF1         | -4021 | TOMM34       | -1090 | CTSE         | 2528 | TRPM7        | 8604 |
| AZ2          | -9991  | CI10orf1     | -6988 | SP2          | -4020 | CI10orf35    | -1089 | LINC00396 // | 2529 | B4GALT1      | 8610 |
| NCSTN        | -9990  | Uchl1        | -6987 | SUGP2        | -4019 | RP11-486G15  | -1088 | CAA // C4B / | 2530 | PDLIM5       | 8612 |
| ELOV16       | -9989  | SEZ6         | -6986 | UOCHR8       | -4018 | GABRB3       | -1087 | LOC1009956   | 2531 | CEBPD        | 8614 |
| NMT1         | -9988  | MSMO1        | -6985 | BCL2L1       | -4017 | CERS6        | -1086 | RP11         | 2532 | TRPA3        | 8617 |
| SIN3A        | -9987  | GATAD2A      | -6984 | TRPM7        | -4016 | TBC1D30      | -1085 | MX1          | 2533 | TPN1         | 8625 |
| ATAD1        | -9986  | MORF4L2      | -6983 | POLR1C       | -4015 | ZNF704       | -1084 | LINC01088    | 2536 | BAZ2A        | 8634 |
| NUDT9        | -9985  | LOC10193011  | -6982 | CIorf43      | -4014 | BC030152     | -1083 | LOC10050705  | 2537 | HLA-DOA      | 8640 |
| CALB1        | -9984  | SMURF2       | -6981 | DCP2         | -4013 | EFTUD1       | -1082 | OAS2         | 2541 | NR1          | 8643 |
| UBA1         | -9983  | NELFD        | -6980 | MRS2         | -4012 | ZFP1         | -1081 | TRM43 // TI  | 2542 | DYNLRB1      | 8650 |
| KPN1         | -9982  | MRLAC2       | -6979 | ERC3B        | -4011 | LTN1         | -1080 | CLEC4G1      | 2544 | PLEKHA3      | 8654 |
| LSM8TL2      | -9981  | DCLRE1C      | -6978 | IFT27        | -4010 | ELMOD2       | -1079 | QDRP         | 2545 | CYP19A1      | 8655 |
| RAB2A        | -9980  | INVS1ABP     | -6977 | MAML1        | -4009 | CORO2A       | -1078 | CP           | 2546 | COA1         | 8659 |
| TCLD1        | -9979  | SSNA1        | -6976 | FGFR1OP      | -4008 | CTD-212488.2 | -1077 | LOC10013205  | 2547 | IQCA1        | 8660 |
| TTC17        | -9977  | FBXO41 // LC | -6975 | DUSP8 // LO  | -4007 | TAI11        | -1076 | HSPA6        | 2548 | KIAA0430     | 8661 |
| ANKS1A       | -9976  | ZNF547       | -6974 | MEDE         | -4006 | PIGK         | -1075 | TNAP         | 2549 | ARHGAP15     | 8666 |
| SLTA         | -9975  | ENK2         | -6973 | LINC00921 // | -4005 | ENK2         | -1074 | MUC17        | 2550 | LRPMB13      | 8672 |
| REL1         | -9974  | PROSER1      | -6972 | RBM15        | -4004 | RNF40        | -1073 | TEX35        | 2551 | MESP1        | 8692 |
| ZNF470       | -9973  | CENPD1P1     | -6971 | ASB7         | -4003 | VEZT         | -1072 | SP110        | 2552 | GLS          | 8695 |
| NUCKS1       | -9972  | ELP6         | -6970 | ELF2         | -4002 | C2orf69      | -1071 | DDX10        | 2554 | MIR124-2HG   | 8697 |
| GT2I         | -9971  | DNAC17       | -6969 | KDM4B        | -4001 | FXR2         | -1070 | LINC00494    | 2555 | DOCK5        | 8700 |
| PIAS2        | -9970  | KIF9         | -6968 | CNCE2        | -4000 | STRN4        | -1069 | LOC400794    | 2556 | BCL2L3       | 8708 |
| PIOD2        | -9969  | MIR6657 // F | -6967 | NBE2         | -3999 | ROR2         | -1068 | ZFP64        | 2560 | PIPP1        | 8709 |
| NGAMT1       | -9968  | NUP37        | -6965 | CDK13        | -3998 | SCWAA        | -1067 | RP11-359K18  | 2561 | GRN          | 8722 |
| ANKLE2       | -9967  | EDC3         | -6964 | TRIM52-AS1   | -3997 | CI6orf59     | -1066 | LOC10192937  | 2562 | SIGLEC7      | 8725 |
| MMIM13       | -9966  | RFXO3        | -6963 | COX5B        | -3996 | MDP1 // NEI  | -1065 | BAAT         | 2563 | SYNE2        | 8726 |
| FAM131A      | -9965  | AKT3         | -6962 | MAGE4A // I  | -3995 | ZNF678       | -1064 | RP11-421F16  | 2564 | TTC12        | 8733 |
| DCAF8        | -9964  | TRAPPC9      | -6961 | TTC32        | -3994 | KRR1         | -1063 | PIK3R4       | 2565 | LOC10013392  | 8746 |
| GKAP1        | -9963  | MTAL         | -6960 | IDH2         | -3993 | OPA1         | -1062 | ATG2B        | 2566 | FOSL2        | 8748 |
| NF334        | -9962  | FUS24B2      | -6959 | ADAM         | -3992 | ATP4A1       | -1061 | FSWAP        | 2567 | ADCV1        | 8758 |
| DVL3         | -9961  | STPG1        | -6958 | LPIN2        | -3991 | SUPT17L      | -1060 | OVGP1        | 2569 | ETNK1        | 8763 |
| LARP4B       | -9960  | ATP6V1D      | -6957 | AMMECR1L     | -3990 | ATL1         | -1059 | PPM1H        | 2571 | SYMPK        | 8773 |
| ZNF814       | -9959  | ZNF711       | -6956 | REV3L        | -3989 | HNRNPM       | -1058 | LAMA3        | 2572 | PVRL1        | 8775 |
| PTPRK        | -9958  | EP30D        | -6955 | EMC9         | -3988 | PHF20        | -1057 | SH3BP1       | 2573 | FBXO3        | 8776 |
| DPY30 // ME  | -9957  | UBRN1        | -6954 | SEZ6L2       | -3987 | TENM3        | -1056 | ARHGAP15 //  | 2574 | ZNF24        | 8777 |
| LINC00493    | -9956  | VPS34        | -6953 | ACR2B        | -3986 | GNS2         | -1055 | ACR2B //     | 2575 | LOC10013392  | 8780 |
| TICRR        | -9955  | MAGOH8       | -6952 | RSGL1        | -3985 | RAB40B       | -1054 | LOC10193015  | 2576 | OPRM1        | 8784 |
| FSCN1        | -9953  | FUNDC2       | -6951 | KAT5         | -3984 | ZDF2         | -1053 | FRAS1        | 2577 | USP12        | 8786 |
| PSMA1        | -9952  | ATG5         | -6950 | COP21        | -3983 | MAP2K5       | -1052 | FBXL18       | 2578 | ACOT11       | 8788 |
| DNAC8        | -9950  | SMAD9        | -6949 | CTBP1        | -3982 | FAM64A       | -1051 | LOC10192883  | 2579 | UGT3A1       | 8789 |
| NCR3L1 // I  | -9949  | ZNF93        | -6948 | FAM149A      | -3981 | EFB5         | -1050 | LINC01138    | 2580 | GPMS1        | 8795 |
| SRB01        | -9948  | FADS2        | -6947 | NOL3         | -3980 | PAFOLG       | -1049 | NOL3         | 2581 | TM71         | 8797 |
| SMARCA2      | -9947  | CACNA1A // I | -6945 | HNRNP33      | -3979 | ILF3         | -1048 | LRRIC18      | 2582 | NG7          | 8801 |
| TMEN15       | -9946  | THAP5        | -6944 | CAND1        | -3978 | VTA1         | -1047 | BOLA2        | 2583 | RAB30        | 8808 |
| TMUB2        | -9945  | FAM118B      | -6943 | KIAA1549     | -3977 | GDAP1        | -1046 | SCARAS5      | 2584 | OPNS         | 8819 |
| AIMP1        | -9944  | STRA13       | -6942 | MIR4723 // I | -3976 | TNPO2        | -1045 | FAM154A      | 2585 | TNS1         | 8821 |
| COX14        | -9943  | FTSJ1        | -6941 | UNK          | -3975 | SPS8A        | -1044 | CFB          | 2587 | CEP170 // CC | 8822 |
| PRR7         | -9942  | TRPT1DA      | -6940 | RNF4B1       | -3974 | SCFD3H       | -1043 | PRKAB1       | 2588 | ZNF235       | 8824 |
| CKAP2        | -9941  | MEK3D        | -6939 | PDL2         | -3972 | ASTN2        | -1042 | ZNF627       | 2590 | PCP2L        | 8853 |
| STIM2        | -9940  | NAP1L1       | -6938 | TMEM245      | -3971 | H2AFX        | -1041 | C17orf99     | 2591 | ARHGAP30     | 8854 |
| LNPEP        | -9939  | PTPRS        | -6937 | ERAL1        | -3970 | LOC10050550  | -1040 | NUDT7        | 2592 | HMG2A        | 8856 |
| TBC8         | -9938  | CEP95        | -6936 | C11orf95     | -3969 | ASTN2        | -1039 | ZNRF2        | 2594 | CYP2C9       | 8858 |
| USP47        | -9937  | RHEB         | -6935 | CEP76        | -3968 | ZNF785       | -1038 | CD9          | 2595 | LOC10192862  | 8862 |
| KDM6B        | -9936  | CEP95        | -6934 | SGB          | -3967 | KDM6A        | -1037 | TTT18        | 2596 | DNAC27       | 8863 |
| DPB8         | -9934  | RHD0M2       | -6932 | CL2orf4      | -3966 | LPIN1        | -1036 | STAB1        | 2598 | GALNT15      | 8868 |
| CCDC171      | -9933  | CAPRIN1      | -6930 | IFT43        | -3965 | MAD2L1       | -1035 | LOC10192949  | 2599 | ASXL2        | 8877 |
| FUT8         | -9932  | PEG10        | -6929 | RAB31P       | -3964 | WDR5         | -1034 | NBEAP1       | 2600 | FAM83A       | 8880 |
| LOC10192767  | -9931  | AZIN1        | -6928 | ZNF445       | -3962 | NUP98        | -1032 | MMP28        | 2602 | FGF1         | 8881 |
| RPN2         | -9930  | ZNF638 // ZH | -6927 | CCDC23       | -3961 | ZNF718       | -1031 | EFR3B        | 2604 | MTMR7        | 8897 |
| PPP2R5C      | -9929  | DXV1         | -6926 | LOC10192767  | -3960 | KXAF1        | -1030 | ECO2         | 2606 | SLC2A3       | 8905 |
| CTU2         | -9928  | TTC3 // TTC3 | -6925 | ZNF850       | -3959 | TMX2         | -1029 | LOC10192888  | 2608 | LOC10050627  | 8906 |
| CP1C         | -9927  | PAIP1        | -6924 | NUCKS1       | -3958 | CACNA2D1     | -1028 | MALAT1       | 2609 | SERPINB13    | 8907 |
| PSMD4        | -9926  | PAFAB181     | -6923 | PTS          | -3957 | POK1L        | -1027 | LOC10192949  | 2610 | RP11-115181  | 8911 |
| BCAP29       | -9925  | DEDD2        | -6922 | KLF16        | -3956 | UMPS         | -1026 | MAG1         | 2613 | ECM2         | 8920 |
| ZDHHC6       | -9924  | DYRK12       | -6921 | KHLH22       | -3955 | NGFRAP1      | -1025 | LOC10013154  | 2615 | FAM122C      | 8931 |
| ATP1V1C1     | -9923  | PRKRI        | -6920 | ITGB4        | -3954 | TRM5A        | -1024 | PRKRI        | 2616 | PCF7B        | 8935 |
| ESRRG        | -9922  | ASB8         | -6919 | ZNHIT2       | -3953 | C17orf80     | -1023 | LRRFP2       | 2617 | EIF4EBP2     | 8936 |
| DCP2         | -9921  | GFPT1        | -6918 | LRRCA1       | -3952 | TTK2         | -1022 | KCNJ15       | 2618 | HLA-D08      | 8937 |
| IMPACT       | -9920  | TIFA         | -6917 | CD28P2       | -3951 | ZNF10        | -1021 | CACNG8       | 2619 | ITGB3        | 8941 |
| ZNF788 // ZH | -9919  | GID4         | -6916 | PRPF8        | -3949 | MAP9         | -1020 | MAP3K19      | 2620 | NOTCH2       | 8952 |
| SYT13        | -9918  | RPE          | -6915 | RNP101-AS1   | -3948 | MAPK8        | -1019 | AMMECR1      | 2622 | C13orf66     | 8953 |
| NRP34        | -9917  | TR2A         | -6914 | TRPA         | -3947 | ASXL1-AS1    | -1018 | RHOJ         | 2623 | NFYS11       | 8955 |
| PPP3CA       | -9916  | FAM179B      | -6913 | SMO1         | -3946 | HNRNPNC      | -1017 | CA13 // LOC  | 2625 | BRD3         | 8958 |
| C9orf28      | -9915  | OSCP1        | -6912 | FLCN // PLD  | -3945 | ZRANB3       | -1016 | C11orf44     | 2628 | KCNAB1       | 8960 |
| NOUHV3       | -9914  | ZNF738       | -6911 | KIAA1430     | -3944 | ZNF292       | -1015 | VCY // VCY1  | 2630 | WWTR1        | 8969 |
| IRS1         | -9913  | PHACTR1      | -6910 | SLU7         | -3943 | SUD53        | -1014 | YPF4         | 2631 | IGSF3        | 8973 |
| PIGV         | -9912  | SRCAP        | -6909 | BAX          | -3942 | OBSL1        | -1013 | WFDC9        | 2632 | STXBPL5      | 8974 |
| KIF1A        | -9911  | PHACTR1B     | -6908 | RNF81        | -3941 | FUBI1        | -1012 | EPH42        | 2633 | ZNHIT6       | 8976 |
| FAM219B      | -9910  | SEN7         | -6907 | CALM1 // CA  | -3940 | SKX2P        | -1011 | SYO1         | 2635 | GSN          | 8990 |
| HMGNA4       | -9909  | NDRG4        | -6906 | ZNF83        | -3939 | GIN1         | -1010 | LINC00869    | 2636 | GPCR5A       | 8995 |
| TOP1         | -9908  | SRD5A3       | -6905 | EMC8         | -3938 | SFXN1        | -1009 | KIAA1654     | 2637 | AASDHPPT     | 8996 |
| GEMIN5       | -9907  | GNA11        | -6904 | LOC10192891  | -3937 | BAG5         | -1008 | LINC00474    | 2639 | GAS7         | 8997 |
| BRF1         | -9906  | PMPCA        | -6903 | SKP2         | -3936 | DDX11 // DD  | -1007 | FUNDC2       | 2642 | SFT2D3       | 9003 |
| KIF1A        | -9905  | SPAT1AS1     | -6902 | HSPB1        | -3935 | RP11-111M2   | -1006 | LOC64090     | 2643 | ATP9B        | 9006 |
| PANK2        | -9904  | UCK1         | -6901 | LINC5A       | -3934 | DHPS         | -1005 | NOS1         | 2644 | CEP41        | 9007 |
| ATR          | -9903  | UBQLN1       | -6900 | ZFAND4       | -3933 | MRPS23       | -1004 | SHC3         | 2645 | LRRC2        | 9026 |
| SGSM2        | -9902  | NR1P1        | -6899 | KIDNS220     | -3932 | BUB3         | -1003 | PLCD3        | 2647 | H19 // MIR6  | 9027 |
| ZNF568       | -9901  | FTO          | -6898 | SUPT4H1      |       |              |       |              |      |              |      |

|              |              |              |              |              |              |              |             |              |          |             |          |
|--------------|--------------|--------------|--------------|--------------|--------------|--------------|-------------|--------------|----------|-------------|----------|
| NIPBL        | -9867        | ANP32E       | -6865        | WVVOX        | -3897        | SNRPB2       | -968        | TRPM6        | 2692     | OSMR        | 9179     |
| GLB1L3       | -9866        | DMNT3A       | -6864        | ATP9A        | -8996        | PRPF40A      | -967        | SLC13A2      | 2693     | PRR26       | 9181     |
| SCAND1       | -9864        | MLLT4        | -6863        | LETMD1       | -3895        | OCDC1        | -966        | WNT5B        | 2694     | MAPP3K2     | 9186     |
| SSH2         | -9863        | AMACR        | /// CI -9862 | ATP9F1       | -3894        | BUD31        | -965        | SH2D4A       | 2694     | IGCA        | 9189     |
| HOXA10-HOX   | -9862        | ANAPC10      | -6861        | TMEM5        | -3893        | VEZF1        | -964        | CAPN6        | 2696     | VWA3A       | 9190     |
| KISS1R       | -9861        | CADM1        | -6860        | BCLAF1       | -8992        | DAXX         | -963        | ITC23        | 2698     | BMP1        | 9192     |
| ADSS         | -9860        | REPIN1       | -6859        | BBS10        | -3891        | RP11-715J22J | -962        | KIF25        | 2699     | DNAH1       | 9196     |
| EPG5         | -9859        | DRAP1        | -6858        | ITC26        | -3890        | MRPL49       | -961        | RP11-753A21  | 2701     | DPH5        | 9198     |
| DTD2         | -9858        | CRY2L1       | -6857        | KRRT1        | -3889        | KATNAL1      | -960        | LOC10050627  | 2702     | URB1        | 9199     |
| NHLH2        | -9857        | MIP3K4       | -6856        | MRP91L       | -3888        | OPHN1        | -959        | PCF4         | 2704     | PCP4        | 9202     |
| EMC1         | -9856        | PAIP1        | -6855        | ITFG1        | -3887        | ATP9B        | -958        | DEFB19       | 2706     | SLC22A7     | 9205     |
| CEP152       | -9855        | HMGXB4       | -6853        | ZNF616       | -3886        | KSR2         | -957        | ZNF507       | 2707     | GDA         | 9220     |
| MTMR1        | -9854        | DDP3         | -6852        | C18orf54     | -3885        | G2E3         | -956        | HLA-DPB2     | 2708     | AFB3        | 9224     |
| TROVE2       | -9853        | ESYT2        | -6851        | STARDA4      | -3884        | SOX11        | -955        | GATA3        | 2710     | TPP1        | 9230     |
| SCAF11       | -9852        | HE5A         | -6850        | CY8SD1       | -3883        | CYCS         | -954        | TRAF3IP2     | 2713     | NDUFA10     | 9232     |
| NLGN1        | -9851        | ENTPD5       | -6849        | PPH4         | -3882        | FXYD6        | -953        | UNC00700     | 2714     | TPM3        | 9239     |
| LRIF1        | -9850        | LDB6         | -6848        | NRK          | -3881        | DCO2A        | -952        | ITC17        | 2715     | URE2D       | 9241     |
| IP011        | /// PO -9849 | HDAC6        | -6847        | LE1          | -3880        | DQ570096     | -951        | MIER1        | 2717     | PARD3B      | 9245     |
| MRPS15       | -9848        | ATXN2        | -6846        | ATXN2        | -3879        | C12orf43     | -950        | LINC01128    | 2718     | FGD2        | 9247     |
| MED28        | -9843        | CCDC18       | -6845        | CCDC18       | -3878        | HYLS1        | -949        | TBX5         | 2720     | SSPN        | 9248     |
| OXDC10       | -9841        | MKI67        | -6843        | MKI67        | -3877        | HAUS1        | -948        | LOC10192966  | 2721     | SMARCB1     | 9252     |
| OSGIN2       | -9840        | RP11-395I6.3 | -6842        | RP11-395I6.3 | -3876        | NOCI         | -947        | LOC154872    | 2722     | MIS18BP1    | 9254     |
| CHRNA1       | -9839        | UBC10        | -6841        | UBC10        | -3875        | ZNF425       | /// ZZ -946 | PAH3A        | 2723     | BCSF29      | 9255     |
| PHKA2        | -9838        | TPD52        | -6840        | TPD52        | -3874        | RNF138       | -945        | RP11-349E4.1 | 2724     | NEDD9       | 9265     |
| C9orf17      | -9837        | DDX50        | -6839        | DDX50        | -3873        | LOC10050653  | -944        | SLC7A14      | 2725     | BTNL9       | 9268     |
| EPB414A-AS1  | -9835        | SUPF4H1      | -6838        | SUPF4H1      | -3872        | EEF1A2       | -943        | LOC157931    | 2728     | SEPT5-GP18B | 9276     |
| MRPL17       | -9834        | SGOL2        | -6837        | SGOL2        | -3871        | ZNF223       | -942        | HOPX         | 2729     | ESR1        | 9277     |
| FDEIC        | -9833        | CDZ5A        | -6836        | CDZ5A        | -3870        | FL42351      | /// I -941  | INPP5D       | 2730     | C9orf117    | 9282     |
| LOC10192793  | -9832        | TKX          | -6834        | TKX          | -3872        | ZNF17        | -939        | CE5A4        | 2731     | AKAP13      | 9289     |
| RADS2        | -9831        | DEPDC1       | -6833        | DEPDC1       | -3868        | FLJ22184     | -938        | LOC10192855  | 2734     | DDAH1       | 9295     |
| TRPM7        | -9830        | MECTP2       | -6832        | MECTP2       | -3867        | TSPLY4       | -937        | RP11-548M1.1 | 2736     | PAPPA       | 9300     |
| EMG1         | -9828        | MBTD1        | -6831        | MBTD1        | -3865        | SOX11        | -936        | BCD63675     | /// Z739 | NLGN2       | 9301     |
| UQC8B        | -9827        | HINFP        | -6830        | HINFP        | -3864        | FLVCR1       | -935        | CYP27B1      | 2740     | SPON1       | 9304     |
| GABPB1-AS1   | -9825        | HIAT1        | -6829        | HIAT1        | -3863        | FLVCR1       | -935        | QAS2         | 2741     | PCSK6       | 9305     |
| LECT1        | -9825        | RNF26        | -6828        | RNF26        | -3862        | KCNMA1       | -934        | C17orf67     | 2742     | TRAP        | 9317     |
| ZDHHC1       | -9824        | ARPP19       | -6827        | ARPP19       | -3861        | SNORA29      | /// -933    | USP46        | 2743     | TRAPPC13    | 9320     |
| RBM14        | -9823        | FAM200A      | -6826        | FAM200A      | -3860        | CWC27        | -932        | RIMS2        | -931     | VXSI        | 9323     |
| PSPC1        | -9822        | PMF1         | -6825        | PMF1         | -3859        | LSM8         | -930        | ACCS1        | 2745     | SLC12A9     | 9326     |
| MAF1L3CA     | -9821        | SMAD4        | -6824        | SMAD4        | -3858        | NGRN         | -929        | UNC00317     | 2746     | AKAP13      | 9327     |
| PPL2A        | -9820        | SUT1         | -6823        | DCLRE1C      | -3856        | CWC15        | -928        | GUSP11       | 2749     | PTP25C      | 9328     |
| UHMK1        | -9819        | KSEF         | -6822        | KSEF         | -3855        | CPFS3        | -927        | ZC4H2        | 2750     | FAM115C     | /// 9331 |
| NIPAS        | /// NF -9818 | RP13-39P12.3 | -6821        | KIF5B        | -3854        | BRAP         | -926        | PBX2         | 2751     | DCTN5       | 9339     |
| DPH6         | -9815        | RNF8         | -6820        | AGP5         | -3853        | SIN3A        | -925        | LOC1019283C  | 2752     | FOXP1       | 9340     |
| SLC25A46     | -9814        | PPP1R37      | -6819        | CHMP5        | -3852        | ZNF473       | -924        | UPP2         | 2753     | BTNL9       | 9341     |
| TAPT1-AS1    | -9813        | SETBP1       | -6818        | SLC25A36     | -3851        | NARS2        | -923        | TLR4         | 2754     | TRABD2B     | 9342     |
| PTDS1        | -9812        | MAM134B      | -6817        | NARS2        | -923         | SEPHS1       | -924        | NAT2         | 2755     | PPP1R3      | 9345     |
| CDKL1        | /// CI -9811 | NUP92        | -6816        | PRPF40A      | -3849        | RBPAP3       | -922        | MRP27        | 2759     | DHX55       | 9348     |
| NSD1         | -9810        | NEGR1        | -6815        | AH11         | -3848        | CHAF1A       | -921        | MAP52        | 2760     | ANKRD40     | 9368     |
| XKR7         | -9809        | RP11-391M1.1 | -6813        | RF3C         | -3847        | LOC10050663  | -920        | DPPA4        | 2760     | SIK2        | 9369     |
| KATNAL2      | -9808        | EKOC6        | -6812        | TIA1         | -3846        | PEBP1        | -919        | RABGAP1L     | 2761     | TACCI       | 9372     |
| C9orf16      | -9807        | RADS1-AS1    | -6811        | C1A01        | -3845        | MAPKAPK5-A1  | -918        | FAM71F1      | 2763     | LOC10050614 | 9373     |
| HSPH1        | -9806        | BCL7B        | -6810        | MAP1B        | -3844        | BIRC5        | -917        | BCD48132     | 2764     | ARHGAP12    | 9382     |
| NIP41        | -9805        | DRS          | -6809        | C19orf25     | -3843        | BR3BP        | -916        | LOC10192746  | 2766     | LAMA3       | 9384     |
| RBM26-AS1    | -9804        | KMT2E        | -6808        | LNB          | -3842        | HOGARP3      | -915        | UNC01153     | 2767     | RHOBTB3     | 9391     |
| RMNDSA       | -9803        | PSMG1        | -6807        | ADD2         | -3840        | CNR1         | -914        | PTCRA        | 2768     | ILSRA       | 9392     |
| TMEM261      | -9802        | RGMB         | -6806        | TMEM14A      | -3839        | ZCCHC10      | -913        | RAB7B        | 2769     | PLEKHG3     | 9393     |
| KL7          | -9801        | PEX5L        | -6805        | ZAH2         | -3838        | DUSP28       | -912        | ZBTB20       | 2770     | SERPINB3    | 9400     |
| PPP1R9A      | -9800        | SOX4         | -6804        | ATPS0        | -3837        | ELAV1        | -911        | ABCC3        | 2771     | BMS1P20     | 9403     |
| DHC97        | -9799        | C9orf24      | -6803        | G1T2H5       | -3836        | BR3BP        | -910        | IL6R         | 2773     | DCS3        | 9405     |
| SOS1         | -9798        | TRAPPC5A     | -6802        | TRAPPC5A     | -3835        | UNIP1        | -909        | TSZ2D2       | 2775     | ADCY1       | 9410     |
| DSEL         | -9797        | BRSK1        | -6801        | PANX1        | -3834        | HSG1G2       | -908        | GOLGA2       | 2776     | DBF4B       | 9411     |
| WRNIP1       | -9796        | KIAA1549     | -8833        | NABP2        | -907         | CLDN12       | /// U -907  | RLN1         | 2777     | FN1         | 9412     |
| UTP3         | -9795        | AMP2         | -8832        | SMEK2        | -906         | NCAPG        | -905        | IFNA7        | 2779     | MESP1       | 9414     |
| ALB32909     | /// -9794    | LSM14A       | -8831        | NCAPG        | -905         | IFNA7        | 2779        | FMO2         | 2780     | MUC17       | 9415     |
| CNB3         | -9791        | TCFL5        | -8830        | OLA1         | -904         | FMO2         | 2780        | SCARF1       | 2781     | HGF         | 9432     |
| FAM32A       | -9790        | DGCR5        | -8829        | DNTN1        | -903         | HSAUS        | -901        | ADRBK1       | 2782     | ZNF107      | 9439     |
| LINC00669    | -9789        | MRPL27       | -6795        | LOC642533    | -8828        | CTSF3        | -902        | KIF13A       | 2783     | RBM52       | 9440     |
| APBA3        | -9788        | SNK5         | -6794        | EID1         | -8827        | FANCI        | -901        | SSX1         | 2784     | TM6SF2      | 9444     |
| LOC388780    | -9787        | NPM1         | -6793        | PATZ1        | -8826        | JKAMP        | -900        | CCDC176      | 2785     | EPN1        | 9445     |
| PMS2P1       | -9786        | TOP3B        | -6792        | RBM15B       | -8825        | SPAG5        | -899        | PHF11        | 2786     | GRIPI1      | 9447     |
| RSD4         | -9785        | ZNF25        | -6791        | ZDHHC4       | -8824        | RNF158       | -897        | PHF11        | 2786     | LOC1006113  | 9447     |
| AC009120.6   | -9784        | LOC10192923  | -6790        | LOC10192923  | -6789        | ZNF323       | -896        | ZNF323       | -896     | KLCC3       | 9449     |
| HEV2         | -9783        | RFOF3        | -6789        | SAC1         | -8822        | MRPL42       | -895        | ALDH4A1      | 2789     | MYEF2       | 9450     |
| IQCA1        | -9782        | PRKAA2       | -6788        | NDFUFA6      | -894         | MCAT         | -893        | CPA4         | 2792     | ARPP21      | 9451     |
| XFH0853      | -9781        | LZHGDDH      | -6787        | MGAT3        | -892         | MGAT3        | -892        | AKAP4        | 2793     | AKAP1       | 9453     |
| KDNB853      | -9780        | TFAM         | -6786        | MIRN636      | /// SI -9819 | ZNF507       | -891        | FOR2         | 2795     | ZKFP1       | 9458     |
| EIF2B1       | -9779        | MTMR9        | -6785        | PHH1L1       | -8818        | ZNF507       | -891        | TINAG        | 2796     | KHSPR       | 9462     |
| NIN          | -9778        | RANBP1       | -6784        | TRKB         | -8817        | TRKB         | -888        | LOC10012864  | 2800     | PTGERS      | 9463     |
| PIN1P        | -9777        | CTD-225GP15  | -6783        | PROM11       | -8816        | ACTL6A       | -889        | LOC10012864  | 2800     | PICL2       | 9472     |
| YTHDC1       | -9776        | LOC202181    | -6782        | ZNF638       | -8815        | FGF9         | -880        | FXYD1        | 2806     | PAPOLG      | 9475     |
| DNAJC25      | /// U -9775  | SEPHS2       | -6781        | RP11-353N14  | -8814        | FAM76B       | -887        | VBP1         | 2807     | CD2AP       | 9478     |
| MESDC2       | -9774        | POLR1D       | -6780        | ALG11        | /// UT -9813 | VBP1         | -886        | IKZF1        | 2807     | PARVG       | 2809     |
| MAPP2K5      | -9773        | PRADC1       | -6779        | PXVLP1       | -8812        | HINT3        | -885        | PARVG        | 2809     | GRIK5       | 9480     |
| KANSL1       | -9772        | BR777        | -6778        | WDR89        | -8811        | ZNF292       | -884        | RBP1P        | 2810     | KLCS        | 9449     |
| RASA1        | -9771        | STOML1       | -6776        | YTHC1        | -8810        | CEW1         | -8810       | ADP2         | 2811     | BAG6        | 9492     |
| ILF3         | -9770        | GRK6         | -8809        | GRK6         | -8809        | PSIP1        | -882        | TOR1AIP2     | 2813     | RNF32       | 9495     |
| MRPS14       | -9769        | RSF1         | -8808        | RSF1         | -8808        | SRSF1        | -881        | LINC01115    | 2815     | DPY19L1     | 9497     |
| RP11-305K5.1 | -9767        | CEP104       | -8807        | CEP104       | -8807        | CP5F6        | -880        | AKO96803     | /// 2816 | CALD1       | 9505     |
| GUSB         | -9766        | ADNP2        | -8806        | ADNP2        | -8806        | NIFK-AS1     | -879        | CP           | 2817     | GRIK1       | 9512     |
| FKBP4        | -9765        | UIC2         | -6772        | NCAM1        | -8805        | CNPY3        | -878        | LOC10193011  | 2818     | GRIN1       | 9512     |
| ZNF789       | -9764        | GAB          | -6770        | ADAM10       | -8804        | ADAM10       | -877        | LINC01138    | 2819     | SLC25A37    | 9517     |
| GLTSCR1L     | -9763        | SREK1        | -6770        | FASTKD1      | -8803        | C11orf171    | -877        | DIAPH3       | 2821     | CEACCE1A    | 9522     |
| ILPH         | -9762        | RPAP1        | -6769        | TUBA1B       | -8802        | LINC00665    | -875        | LOC285638    | 2822     | ATP9B       | 9524     |
| XPO6         | -9761        | CREM         | -6768        | RANGRF       | -8801        | MLLT11       | -874        | CTS8         | 2823     | C9orf156    | 9531     |
| RIMS1        | -9760        | UBE2Q1       | -6769        | SPATA33      | -877         | SPATA33      | -877        | LRRC2        | 2826     | APOLA       | 9532     |
| STX16        | -9759        | PHLP1P       | -6765        | ZNF567       | -3798        | US2APR       | -872        | GPLD1        | 2827     | CEB1        | 9536     |
| STM2         | -9758        | GADD45GIP1   | -6763        | ENDOG        | -8797        | ENDOG        | -878        | COX5B        | 2829     | AFB4        | 9549     |
| RAPGEF6      | -9757        | PP3CA        | -6762        | BLOC156      | -3795        | RP11-255C15  | -870        | KIAA1257     | /// 2830 | FGFR2       | 9554     |
| DNAJB6       | /// TH -9756 | HSPBAP1      | -6761        | UBA2         | -3793        | RP9          | -869        | BACE2        | 2831     | FOXP1       | 9557     |
| SH2B2        | -9755        | PNPLA8       | -6759        | PAPOLG       | -3792        | KIAA0895     | -868        | PSENI1       | 2834     | ZNF540      | 9565     |
| RHB          | -9753        | BRP1         | -6757        | CEP131       | -3791        | SNAPC3       | -867        | LIMK1        | 2835     | BAHC1       | 9575     |
| TMEM185A     | -9751        | SNRPD1       | -6756        | TMEM68       | -3790        | EBNA1BP2     | /// -866    | ORSP3        | 2837     | PHRF1       | 9578     |
| RBM10        | -9750        | FM11B        | -6755        | LOC10028745  | -865         | ORSP3        | -865        | ODF3         | 2838     | G58B        | 9581     |
| UBAP2L       | -9749        | RSN1         | -6754        | IP08         | -3788        | TSNAX        | -864        | LOC10028705  | 2840     | FBLN1       | 9583     |
| CACNB2       | -9748        | IPP          | -3787        | TBC1D30      | -863         | TBC1D30      | -863        | LOC10192795  | 2841     | CACNB4      | 9586     |
| FXO4         | -9747        | USP7         | -862         | USP7         | -862         | IFGN1        | -842        | IFGN1        | 2842     | FXYD3       | 9590     |
| CCDC50       | -9746        | AGAP1        | -861         | AGAP1        | -861         | MYCNOS       | 2855        | SELE         | 2856     | RIN2        | 9594     |
| SLC38A9      | -9745        | PRR11        | -860         | PRR11        | -860         | LIMD2        | 2844        | SELE         | 2856     | ADAMT56     | 9654     |
| USP9X        | -9744        | CFP68        | -859         | CFP68        | -859         | SHH          | 2845        | LOC389199    | 2857     | CRBP        | 9683     |
| ZNF665       | -9743        | CSE1L        | -858         | CSE1L        | -858         | DADA         | 2846        | KCNA5        | 2858     | CPD         | 9690     |
| KIAA0368     | -9742        | POLD1        | -857         | POLD1        | -857         | LOC10050568  | 2847        | OR51B2       | 2859     | SETMAR      | 9691     |
| IKZF4        | -9741        | ASPHD1       | -856         | ASPHD1       | -856         | TMPP5S13     | 2848        | MRC2         | 2861     | PML         | 9696     |
| METTL8       | -9740        | CTNND2       | -855         |              |              |              |             |              |          |             |          |



|               |          |               |       |               |       |               |      |              |      |               |       |
|---------------|----------|---------------|-------|---------------|-------|---------------|------|--------------|------|---------------|-------|
| SPATA7        | -9709    | GNB1          | -6710 | SNRPE         | -3746 | SMC4          | -822 | CLIC5        | 2893 | LMAN2         | 9814  |
| PIA54         | -9708    | LINC00621     | -6709 | MAZ           | -3745 | ZNF572        | -821 | FYXD3        | 2897 | IHH           | 9816  |
| DR1           | -9707    | ARFRP1        | -6708 | CC74          | -3744 | SNRPE         | -820 | ZNF595       | 2898 | CEP112        | 9817  |
| NHLH1         | -9706    | HNT1          | -6707 | CN07B         | -3743 | TRD1          | -819 | FL37786      | 2899 | HS9B          | 9833  |
| CCZ1          | /// CCZ1 | WIF3          | -6706 | SPR7N         | -3742 | ZNF512B       | -818 | LOC1019278E  | 2902 | KCNAB1        | 9842  |
| RUF3          | -9704    | DYM           | -6705 | TEAD1         | -3741 | RNF24         | -817 | FOXDA /// FO | 2903 | EGOT          | 9855  |
| SOS1          | -9702    | 37500         | -6704 | LPHN3         | -3740 | CDC47L        | -816 | CR936796     | 2904 | ADTRP         | 9857  |
| RNF165        | -9700    | RTN4P1        | -6703 | ACOT7         | -3739 | CHD2          | -815 | FAM46C       | 2905 | STAT3         | 9858  |
| RNF4          | -9699    | GATC          | -6702 | CDK5          | -3738 | ND51          | -814 | WSP5         | 2906 | BCL2L14       | 9881  |
| SRR72         | -9698    | LRN510        | -6701 | WZ17          | -3737 | LYRM7         | -813 | SLC27A5      | 2907 | GN32          | 9903  |
| FBX09         | -9697    | BBSA          | -6700 | ZNF506        | -3736 | HSPA13        | -812 | HCRTR2       | 2908 | GYP4          | 9904  |
| LIN7A         | -9696    | CBL           | -6699 | DHRX5         | -3735 | ZNF74         | -811 | GSTA3        | 2909 | TP63          | 9907  |
| LYSMD4        | -9695    | BALIP2L1      | -6698 | PARP6         | -3734 | RADIL         | -810 | TECTB        | 2911 | PIWIL2        | 9908  |
| FBXO28        | -9694    | PPP1R7        | -6697 | SOXA          | -3733 | ZNF260        | -809 | ANKRD29      | 2913 | MMP2          | 9914  |
| EIF3E         | -9692    | DRG1          | -6696 | APEX1         | -3732 | FBX14         | -808 | NRP1         | 2915 | UPB1          | 9918  |
| ZCCHC7        | -9691    | C20orf8       | -6695 | ZCCHC7        | -3731 | TOP2A         | -807 | CNPF1        | 2916 | ABRA          | 9919  |
| IBAS7         | -9690    | PCRN13        | -6694 | HSPB11        | -3730 | ZNF591        | -806 | INOB0D       | 2917 | RAB7A         | 9922  |
| SMUG1         | -9689    | GATAD2B       | -6693 | KATS          | -3729 | RRM1          | -805 | LOC1019289E  | 2918 | ZNF208        | 9925  |
| AP5M1         | -9688    | MTX1          | -6692 | ZNF540        | -3728 | MAD2L2        | -804 | LOC10192947  | 2921 | SLC7A1        | 9935  |
| WAC-AS1       | -9687    | TPG52         | -6690 | UBE3D         | -3727 | METTL4        | -803 | POU2F2       | 2922 | C18orf25      | 9937  |
| MRB3          | -9686    | EPC1          | -6689 | CCDC10        | -3726 | FAM20B        | -802 | NRP2         | 2923 | RCN3          | 9938  |
| ARHGAP18      | -9685    | DES2          | -6688 | HCF1          | -3725 | LOC10192854   | -801 | IQGAP3       | 2924 | UQC1          | 9942  |
| GLCC1         | -9684    | PKORX         | -6687 | PCGF5         | -3724 | FAR1          | -800 | POLR2J2      | 2927 | GNB5          | 9944  |
| TMEM80        | -9683    | MIR636 /// SR | -6686 | GPS2          | -3723 | EMC10         | -799 | SLC22A14     | 2928 | RHOH          | 9946  |
| PPP3CA        | -9682    | DNAJC8        | -6685 | MIR3934 ///   | -3722 | ANKRD50       | -798 | GREM2        | 2929 | THR8          | 9947  |
| AK3           | -9681    | HSP1-MOB4     | -6684 | KIAA1279      | -3721 | Clorf109      | -797 | LOC93463     | 2931 | PDE1C         | 9959  |
| PPP6C         | -9679    | ADK           | -6683 | TUBB3         | -3720 | TYMS          | -796 | MTG2         | 2932 | RNF213        | 9960  |
| KMT1          | -9678    | CCDC124       | -6682 | TRIKK         | -3719 | TMEM97        | -795 | BANP2-AS1    | 2933 | DNAH1         | 9964  |
| RP11-517B11   | -9677    | AMO1          | -6681 | SCAMP1        | -3718 | FLJ10038      | -794 | UCA1         | 2934 | MPOU1         | 9968  |
| GZEB          | -9676    | GNAS          | -6680 | TIAL1         | -3717 | PSIP1         | -793 | ACTN1        | 2935 | ADAM7         | 9969  |
| RP11-635N19   | -9675    | PAGR1         | -6679 | CPD5A         | -3716 | NBEA          | -792 | LINC00643    | 2936 | IL12RB1       | 9974  |
| RNF114        | -9674    | ZNF10         | -6677 | PELP1         | -3715 | CDC47         | -791 | LOC10050627  | 2937 | MSRB3         | 9976  |
| ASPH          | -9672    | RAB31P        | -6676 | DNAIC10       | -3714 | RFC2          | -790 | AQP7 /// LOC | 2938 | LARP4B        | 9982  |
| ZMYM2         | -9671    | FH            | -6675 | HNRNPAB       | -3713 | SRSF10        | -789 | LOC145678    | 2940 | WWTR1         | 9985  |
| THAP9         | -9670    | GOLM4         | -6674 | SMAD1         | -3712 | UBE2T         | -788 | CSPG4P1Y     | 2942 | PLEKHG3       | 9988  |
| KFBP1A /// LC | -9669    | SWNCRP        | -6673 | ZNF398        | -3711 | LRRCA9        | -787 | FUT10        | 2943 | RAPGEF6       | 9994  |
| MLX           | -9668    | PTAR1         | -6672 | TRA2B         | -3710 | SRSF3         | -786 | FGD5-AS1     | 2944 | ZDHHC21       | 9995  |
| TMEM167A      | -9667    | PUM2          | -6671 | SMN13         | -3709 | MED19         | -785 | RPAIN        | 2945 | FAM9B         | 10001 |
| TRIM37        | -9666    | PPP2R5E       | -6670 | PAIC5         | -3708 | CHERP         | -784 | MYF6         | 2947 | IL1RL1        | 10004 |
| PQLC2         | -9665    | TPG52         | -6669 | PPP2CA        | -3707 | WHD01         | -783 | LINC00672    | 2948 | UHMK1         | 10014 |
| ANKF1         | -9664    | SMARCA1       | -6668 | SNAPC7        | -3706 | WDR5          | -782 | SOX6         | 2949 | ANK           | 10020 |
| SMARCC1       | -9663    | ARHGEF7       | -6667 | PAR6B         | -3705 | ZNF56         | -781 | JM1D7-PLA2G  | 2950 | MORN1         | 10028 |
| BRD7          | -9662    | HMC65         | -6666 | AC004941.5    | -3704 | TMEM237       | -780 | TNFRSF12A    | 2951 | RASGRP2       | 10030 |
| MFS06         | -9661    | TOLLIP-AS1    | -6664 | NOL7          | -3703 | HNRNPDL       | -779 | SMTN         | 2952 | TLR4          | 10032 |
| CNSK1G1       | -9660    | PRRC2B        | -6663 | BAG6          | -3702 | RBAK          | -777 | DP4          | 2953 | BRM26         | 10033 |
| CDK12         | -9659    | CCNY          | -6662 | FAM126A       | -3701 | ARMC1         | -776 | AIP1         | 2954 | MTSL1         | 10039 |
| STK17B        | -9658    | PTK10         | -6661 | PIR2A12A      | -3700 | PIR2A12A      | -775 | NCR2         | 2956 | FIND3B /// LC | 10043 |
| MED14         | -9657    | ENO2          | -6660 | HDHD2         | -3699 | ADD2          | -774 | DDPA4        | 2959 | C14orf1       | 10047 |
| ZNF118        | -9656    | LOC729683     | -6659 | KPNAS         | -3698 | NDUFA4        | -773 | TMEM241      | 2960 | CNSK1A1       | 10048 |
| ANAPC4        | -9655    | AKG           | -6658 | BC042855 ///  | -3697 | ZYG11B        | -772 | STAT5A       | 2961 | HDAC9         | 10077 |
| ETNK2         | -9654    | ZNF585A       | -6657 | POP7          | -3696 | CBX2          | -771 | ZNF99        | 2962 | WNT2B         | 10083 |
| APEH          | -9652    | LIN37         | -6656 | PTPRG-AS1     | -3695 | RTN3          | -770 | CE3          | 2963 | GULP1         | 10096 |
| PHF3          | -9651    | NUPH1         | -6655 | ATP55         | -3694 | UN52          | -769 | TC7L2        | 2964 | MED12         | 10097 |
| NIN           | -9650    | LOC10027721   | -6654 | XCR1L         | -3693 | PCP4          | -768 | MRB2         | 2965 | MRB2          | 10099 |
| CACUL1        | -9649    | ZNF148        | -6653 | SPICE1        | -3692 | UQCRR /// UC  | -767 | MLANA        | 2966 | ELF3          | 10104 |
| EMC1          | -9648    | BLOC156       | -6652 | URL1          | -3691 | RANBP2        | -766 | TOLLIP       | 2967 | GRIN2C        | 10106 |
| FAM96B        | -9647    | MPPED2        | -6651 | ASH2L         | -3690 | CEP120        | -765 | TIRAP        | 2971 | KDMS5B        | 10117 |
| TCF12         | -9646    | POLR1B        | -6650 | BRF2          | -3689 | FAM92A1       | -764 | GSTTP1       | 2972 | KIF6          | 10123 |
| BGALNT5       | -9645    | CXD7C         | -6648 | ESF1          | -3688 | DS3           | -763 | AQP2         | 2973 | SLC25A37      | 10134 |
| DYNC1L1       | -9644    | TDRK1         | -6647 | LARF7         | -3687 | SYT1          | -762 | LINC00518    | 2974 | OR4           | 10140 |
| DAK           | -9643    | STAR10        | -6646 | RPP25         | -3686 | RPRD2         | -761 | LOC388882    | 2975 | CDK13         | 10141 |
| RPL7L1 /// W  | -9642    | NPAL3         | -6645 | ARL4EP        | -3685 | FAM98B        | -760 | LOC10013011  | 2976 | PARD3B        | 10148 |
| PEBP1         | -9641    | ZNF12         | -6644 | UQCRCF5       | -3684 | HUJRP         | -759 | RP11-515O17  | 2979 | HIST1H3E      | 10150 |
| RBBP9         | -9640    | BAI2          | -6643 | BAI2          | -3683 | LYRM2         | -758 | VIM          | 2980 | NRP2          | 10155 |
| SRSF1         | -9639    | ARCTF1        | -6642 | KCTD7 /// RAI | -3682 | WDR75         | -757 | GTDC1        | 2981 | RBM33         | 10158 |
| GAB2          | -9638    | GOSR2         | -6641 | KPNA1         | -3681 | FAM71F2       | -756 | FAM71F2      | 2982 | HR            | 10160 |
| LSAMP         | -9637    | TRMT13        | -6640 | RP11-127820   | -3680 | KPNA2         | -755 | MMP24-AS1    | 2983 | CCDC171       | 10163 |
| MTC1          | -9636    | PHF13         | -6639 | CEPB3         | -3679 | DNAJC9        | -754 | RNASE7       | 2984 | FAM46C        | 10165 |
| POLE4         | -9635    | DIEXF         | -6638 | ZKSCAN5       | -3678 | AP3M2         | -753 | LINC00842    | 2985 | TUB           | 10166 |
| PDP1          | -9634    | MCF21-AS1     | -6637 | TMEM38B       | -3677 | SAP30         | -752 | TAGAP        | 2987 | NAP1L4        | 10178 |
| BACE1         | -9631    | AGCF1         | -6636 | MRLP19        | -3676 | RICK1         | -751 | KIA0226      | 2988 | ADAM22        | 10179 |
| LINC01004     | -9630    | PCP4          | -6635 | XPO5          | -3675 | XPO5          | -750 | BC031255 /// | 2989 | EF4E          | 10181 |
| PQLC2         | -9629    | CCDC59        | -6634 | WSB2          | -3674 | NIP2A         | -749 | Clorf113     | 2990 | ZDHHC21       | 10190 |
| SHOX2         | -9628    | SUTRKA        | -6633 | CCDC142       | -3673 | RM12          | -748 | ORS4K4P      | 2991 | SYT12         | 10198 |
| ATP2B1        | -9627    | GNPD0A2       | -6632 | ENOSF1        | -3672 | KDM1B         | -747 | LOC10272354  | 2992 | ABCC13        | 10207 |
| RFP1L5        | -9626    | RTN2          | -6631 | METTL2B       | -3671 | BAZ1B         | -746 | FKBP11       | 2993 | NBEAP1        | 10212 |
| CELF4         | -9625    | UBE2LQ1       | -6630 | TMEM107       | -3670 | PHN1          | -745 | SLC35D1      | 2994 | CLMP          | 10214 |
| C5orf30       | -9624    | CNF7          | -6629 | KIA02022      | -3669 | ZNF418        | -744 | LOC1005064C  | 2995 | KIAA1217      | 10219 |
| TEAD1         | -9623    | GRIK5         | -6628 | RC3H2         | -3668 | RBF0X1        | -742 | RCE1         | 2996 | ITGB3         | 10233 |
| TAGLN2        | -9622    | ZNF708        | -6627 | SET /// SETSF | -3667 | MTERF4        | -741 | LINC01310    | 2997 | RPL35A        | 10234 |
| EBLN3         | -9621    | IPOS          | -6626 | RAB11FIP3     | -3666 | CHST10        | -740 | NPC1         | 2999 | OFCC1         | 10237 |
| DPYSL4        | -9620    | TERF2IP       | -6625 | PI4KA /// PI4 | -3665 | METTL9        | -738 | NUPR1        | 3000 | ABCC3         | 10238 |
| DGKI /// LOC1 | -9619    | MIR600 /// M  | -6624 | LPD1          | -3664 | CPOX          | -737 | ATP50        | 3001 | ACTR8         | 10243 |
| SREK1P1       | -9618    | KMT2D         | -6623 | TM2D1         | -3663 | ZBTB44        | -736 | BMV1         | 3002 | MBP           | 10250 |
| SMC8P1        | -9617    | NDUFB9        | -6622 | C1orf142      | -3661 | TRAF1B        | -735 | DNM3         | 3003 | RUNX2         | 10251 |
| YME1L1        | -9616    | PITPNM2       | -6621 | NUDT12        | -3660 | PRPF4         | -734 | GLYT4        | 3004 | GAS6          | 10254 |
| GOPC          | -9615    | TMEM218       | -6620 | UNKL          | -3659 | ZFP82         | -733 | CLEC12A      | 3005 | MAST4         | 10257 |
| CAPIN1        | -9614    | NDUFV2-AS1    | -6619 | NUPL1         | -3658 | PARP6         | -732 | IFT81        | 3006 | TRPV5         | 10263 |
| TMEM151B      | -9613    | ESD           | -6618 | TPD52         | -3657 | KCNH2         | -731 | C4BPB        | 3007 | PPM1K         | 10269 |
| ZNF133        | -9612    | TP53RK        | -6617 | LAPTM4B       | -3656 | LOC10192767   | -730 | OK/SW-CL36   | 3008 | ADAM22        | 10270 |
| EP300-AS1     | -9611    | DNAH9         | -6616 | SMARCA1       | -3655 | SARMP         | -729 | SMARCA1      | 3009 | SOCS3         | 10271 |
| USP48         | -9610    | HSPB11        | -6615 | HSPB11        | -3654 | KIF21A        | -728 | ALOXE3       | 3011 | ITGB1         | 10299 |
| SCAND1        | -9608    | RSRC1         | -6614 | ZNF674-AS1    | -3653 | HNRNPDD       | -727 | TGFA         | 3013 | SIX3          | 10301 |
| PDPR          | -9607    | MIR531        | -6613 | RP11-715122   | -3652 | PSPH          | -725 | KLK4         | 3014 | BTRC          | 10302 |
| RP11-214N9.1  | -9606    | TMEM9         | -6612 | CCDC113       | -3651 | BEN03         | -724 | BDH2         | 3015 | USP31         | 10315 |
| MIR528        | -9605    | LINC00476 /// | -6611 | NREP          | -3650 | LUC7L3        | -723 | TAPBP        | 3016 | GGT1 /// GGT  | 10318 |
| MARFAP1       | -9604    | ZSOD1         | -6610 | CKAP4         | -3649 | ENOS9         | -722 | CTD-2519J13  | 3017 | LOC111        | 10325 |
| C12orf56      | -9603    | RWDD4         | -6609 | CSTF2         | -3648 | PIPH          | -721 | ZMYM2        | 3018 | PITPN9        | 10326 |
| HOXA3         | -9602    | COG8 /// PDF  | -6608 | SLC35B1       | -3647 | CNNA2         | -720 | RP11-25115.3 | 3021 | PCDC2         | 10328 |
| NANOS1        | -9601    | BVLR4         | -6605 | TRAPP11       | -3646 | ZNF585A       | -719 | PVRL2        | 3022 | ZNF138        | 10337 |
| AXIN2         | -9600    | SLC25A38      | -6604 | TOXA          | -3645 | CKAP2         | -718 | FAM26F       | 3023 | KIFC3         | 10339 |
| CBLN1         | -9599    | ZBEDCL        | -6603 | CKADR         | -3644 | SMARCA4       | -717 | ALB31948 /// | 3024 | HNMT          | 10345 |
| LXG1          | -9598    | DHAP2         | -6602 | LYRM8         | -3643 | LYRM8 /// SW  | -716 | BRP3         | 3025 | CKX2          | 10360 |
| CPYD1         | -9597    | ADHS          | -6601 | VPS25         | -3642 | FAM99B        | -715 | NRNG2        | 3026 | RARB          | 10362 |
| GMD5-AS1 ///  | -9596    | LAGE3         | -6600 | ALDH5A1       | -3641 | SRSF1         | -714 | RP11-471822  | 3027 | MEG3          | 10363 |
| INTS5         | -9595    | EMC4          | -6599 | RHEB          | -3640 | TDG           | -713 | PCDH1        | 3028 | NPHP1         | 10367 |
| STK11IP       | -9594    | THNSL1        | -6598 | THNSL1        | -6599 | TMPO          | -712 | OR7C2        | 3029 | LFN1          | 10369 |
| LOC10272519   | -9593    | DIEXF         | -6597 | SNHG17        | -6598 | PKI55         | -711 | ALDH3B2      | 3030 | EMFB3         | 10376 |
| AIP           | -9592    | LYRM4         | -6596 | IPOS          | -6597 | MIR4691 /// 1 | -710 | LMAN1        | 3032 | SARDH         | 10388 |
| CTPS2         | -9591    | HINT1         | -6595 | ZKDC          | -6596 | FZD3          | -709 | SOCS3        | 3034 | METTL20       | 10389 |
| CP5A          | -9590    | ZBTB14        | -6594 | TGFBAP1       | -6594 | DTYMK         | -708 | AC064852.4   | 3035 | IKZF1         | 10397 |
| COQ6          | -9589    | IGSF9         | -6593 | PKRAA2        | -6593 | ZNF222        | -707 | RP11-24D15.1 | 3037 | MBP           | 10398 |
| UHRF2         | -9588    | AKR1B1        | -6592 |               |       |               |      |              |      |               |       |

|               |       |               |       |               |       |               |      |               |      |               |       |
|---------------|-------|---------------|-------|---------------|-------|---------------|------|---------------|------|---------------|-------|
| ZNF672        | -9553 | PTPMT1        | -6557 | ARHGAP19      | -3599 | PIGM          | -670 | HIST1H4I      | 3086 | CCDC171       | 10524 |
| CBX           | -9552 | ZNF644        | -6556 | TRIM24        | -3598 | EIF4E         | -671 | GFMT1         |      | SV2B          | 10531 |
| TRK4          | -9551 | ZNF641        | -6555 | SAMD4B        | -3597 | ZNF639        | -670 | RP11-845C23   | 3089 | MED12L        | 10541 |
| ZBTB1         | -9550 | MIRFAP11      | -6554 | CDC14         | -3596 | SIRPB1        | -669 | AF0H          | 3091 | ATP4B         | 10543 |
| Clorf95       | -9549 | TRA2B         | -6553 | PGDRI         | -3595 | KIF3A         | -668 | ALDH1L1-AS2   | 3093 | TYRO3P        | 10544 |
| Clorf174      | -9548 | KCNQ2         | -6552 | NOLC1         | -3594 | CDC6          | -667 | LOC10192765   | 3094 | GATA3         | 10545 |
| GNL3 /// SMO  | -9547 | HDLBP         | -6551 | HS3ST5        | -3593 | ZNF785        | -666 | PSD4          | 3095 | EPB41L2       | 10547 |
| ABHD3         | -9546 | DBNDD2 /// S  | -6550 | SEPECS        | -3592 | ZNF3          | -665 | NUP188        | 3096 | ZNF462        | 10549 |
| KMT2C         | -9545 | MIER3         | -6549 | NDUFA5        | -3591 | SMCS          | -664 | RG520         | 3097 | SAMD4B        | 10560 |
| TPM2          | -9544 | ZADH2         | -6548 | DMG1          | -3590 | GNL3          | -663 | NEK9          | 3098 | TNAG          | 10564 |
| TRPA1         | -9543 | GRIN3A        | -6547 | SETD6         | -3589 | RNF130        | -662 | ANKRD19P      | 3101 | SETD4         | 10565 |
| VT1A          | -9542 | ISLR2         | -6546 | NFYC          | -3588 | IMMP1L        | -661 | PLG           | 3102 | LMBR1         | 10566 |
| GPATCH2L      | -9541 | SRFBP1        | -6545 | GTPBP4        | -3587 | MSANTD3       | -660 | PNLPRP1       | 3103 | MIR612 /// NE | 10573 |
| SCFD1         | -9540 | CTC-429P9.3   | -6544 | MB21D2        | -3586 | GUSBP3 /// SI | -659 | LCN6          | 3104 | GTPBP2        | 10574 |
| TMCO3         | -9539 | PCGF3         | -6543 | NUOT7J        | -3585 | C12orf65      | -658 | ARRHGAP27     | 3105 | TSAG10        | 10582 |
| TE12          | -9538 | ZADH2         | -6542 | LSM11         | -657  | LSM11         | -657 | PLEKHG3       | 3107 | MEG3          | 10592 |
| ARCD3         | -9537 | CDC123        | -6541 | CEP290        | -3583 | TRF5          | -656 | TMF5F2        | 3108 | SPAG9         | 10643 |
| GMRFB         | -9536 | PCHD7         | -6540 | HIVEP1        | -3582 | HNRNPDD       | -655 | ZNF326        | 3109 | AVL9          | 10596 |
| SH3BGR        | -9535 | FOXJ3         | -6539 | ABHD10        | -3581 | CYTH2         | -654 | GDA           | 3110 | PVR           | 10599 |
| USP31         | -9534 | ACTR3B        | -6538 | ZCCHC10       | -3580 | C12orf76      | -653 | PRB1          | 3111 | MEX3C         | 10602 |
| DNAJC17       | -9533 | MMGT1         | -6537 | MDM1          | -3579 | KBTBD7        | -652 | RP11-432J9.6  | 3113 | MIR3656 /// T | 10608 |
| TPP2          | -9532 | RP114         | -6536 | PIN4          | -3578 | TMEM178B      | -651 | ALPK1         | 3115 | SAMHD1        | 10609 |
| PMS2P3        | -9531 | NAP1L1        | -6535 | RNME1         | -3577 | MPHOSPH9      | -650 | NOTCH2        | 3116 | LUR4          | 10615 |
| RANBP1        | -9530 | NAP1L3        | -6534 | PKRRA         | -3576 | PHL1          | -649 | LOC10065308   | 3118 | EPB41L2       | 10621 |
| SUD5          | -9529 | RABEP1        | -6533 | CBX3          | -3575 | PHF12         | -648 | CTNND2        | 3120 | ETV1          | 10622 |
| PCBP2         | -9528 | IGDC3         | -6532 | GTF2I /// GTF | -3574 | FADS1 /// Mif | -647 | CFTR          | 3121 | RP56KA6       | 10631 |
| PGO2          | -9527 | FGR1OP        | -6531 | TMA16         | -3573 | PSIP1         | -646 | SOHLH2        | 3122 | GREM2         | 10634 |
| ARHGEP7       | -9526 | UCRQ          | -6530 | ONEUT2        | -3572 | CBX3          | -645 | RP11-503C24   | 3124 | MTG2          | 10638 |
| ZNF455        | -9525 | NUMA1         | -6529 | CENPL         | -3571 | PCNA          | -644 | LINC01260     | 3125 | SPAG9         | 10643 |
| GOLGA6L4 ///  | -9524 | CDK1          | -6528 | HDXFRP3       | -3570 | VEZF1         | -643 | PARVA         | 3126 | MCF2          | 10647 |
| MAP3K7        | -9523 | AAR2          | -6527 | NIM1K         | -3569 | AVL9          | -642 | ERV3-1        | 3127 | ATP2A3        | 10658 |
| CKLF          | -9522 | MFN6          | -6526 | LBR           | -3568 | TARDBP        | -641 | LOC10050566   | 3128 | RALGAP1       | 10662 |
| TTCC31        | -9521 | ALKB3         | -6525 | MAPK7         | -3567 | PPM1B         | -640 | BC034578 ///  | 3129 | ZNF547        | 10669 |
| ZBTB5         | -9520 | BC040901 ///  | -6524 | IQCK          | -3566 | ATAD2         | -639 | LTBP3         | 3131 | CD6           | 10677 |
| GCK1          | -9519 | ITIC          | -6523 | LINC          | -3565 | TAL1          | -638 | AOX1          | 3132 | AD52          | 10679 |
| GIGYF2        | -9518 | GABPA         | -6522 | SPAG9         | -3564 | C7orf55 /// C | -636 | CCDC108       | 3133 | DECC1         | 10686 |
| SREK1P1       | -9517 | TMED4         | -6521 | ZNF213-AS1    | -3563 | TMEM17        | -635 | PSMD6-AS2     | 3134 | CTNNA3        | 10695 |
| MED13         | -9516 | Clorf174      | -6520 | ZNF251        | -3562 | PTPLAD1       | -634 | TCP1L1        | 3136 | ANKUB1        | 10701 |
| CHMP5         | -9515 | HP54          | -6519 | ZNF428        | -3561 | HELLS         | -633 | SIGLEC1       | 3137 | BAG2          | 10702 |
| FAM133B ///   | -9514 | AK1           | -6518 | NRNK1         | -3560 | QSOX2         | -632 | MGC40069 ///  | 3138 | TMPS52        | 10705 |
| SP5           | -9513 | SLC9A7        | -6517 | CNOL1         | -3559 | CTOF69        | -631 | CTOF69        | 3139 | BUNKB2        | 10706 |
| RBM17         | -9512 | ZKSCAN1       | -6516 | PPP6C         | -3558 | MATR3 /// SN  | -630 | EPST11        | 3140 | DUSP16        | 10713 |
| ZMYM4         | -9511 | WRP4          | -6515 | TMEM194A      | -3557 | RNGTT         | -629 | POMK          | 3141 | LOC283045     | 10714 |
| ZNF271        | -9510 | ACTR8         | -6514 | EXOSC3        | -3556 | NAT14         | -628 | GATAD2A       | 3142 | SDPR          | 10715 |
| KCNQ4         | -9509 | DPP10-AS1     | -6513 | CCDC53        | -3555 | SNRPG         | -627 | PZD3          | 3143 | DCAF8         | 10716 |
| NDRG3         | -9508 | ADPRM         | -6512 | ACOT1 /// AC  | -3554 | TMEM68        | -626 | SPDR          | 3144 | MASP2         | 10719 |
| SYL3          | -9507 | SLC11         | -6511 | ICAN3         | -3553 | TATDN3        | -625 | RK3           | 3145 | PTM2L1L12     | 10720 |
| UAA1191       | -9506 | FILUNC1       | -6510 | LINC7         | -3552 | COP5          | -624 | TRM66         | 3146 | VEK3          | 10733 |
| PLXNA3        | -9505 | CLUAP1        | -6509 | CASC5         | -3551 | HMG82         | -622 | TMEM50B       | 3147 | ADSS          | 10748 |
| LAPTM4B       | -9504 | MAMSTR        | -6508 | DMXL2         | -3550 | TMM17A        | -621 | ACTN2         | 3149 | SIRT3         | 10752 |
| TCF4          | -9503 | KCNH6         | -6507 | FRMD5         | -3549 | TMEM203       | -620 | METTL7        | 3150 | PECAM1        | 10765 |
| NUPF2         | -9502 | AIMP2         | -6506 | MIER3         | -3548 | UZAF2         | -619 | ITPK8         | 3151 | PARD3B        | 10770 |
| HERC4         | -9501 | UTP6          | -6504 | CKC2G         | -3547 | TRAPPC2 /// T | -618 | LPAR1         | 3152 | CARD14        | 10772 |
| HNRNP4L       | -9500 | COMMD2        | -6503 | SEC22A        | -3545 | SNRPC         | -617 | SYT12         | 3153 | GCOM1 /// PC  | 10778 |
| PCGF3         | -9499 | NDUFS1        | -6502 | CDK19         | -3544 | AMBRA1        | -616 | TCRA /// TRA  | 3154 | ZNF585A       | 10781 |
| TENM1         | -9498 | CNTLN         | -6501 | CBWD1 /// Ct  | -3543 | UBE3A         | -615 | OTP           | 3155 | EHF           | 10785 |
| KIAA1143      | -9497 | UBE4A         | -6500 | BNP2          | -3542 | WDHD1         | -614 | C19orf83      | 3156 | STL7          | 10789 |
| COG8          | -9496 | PEX13         | -6499 | DKC1 /// MIR  | -3541 | MIR4723 /// T | -613 | LOC10050765   | 3157 | CRHR1-IT1 /// | 10795 |
| MARK1         | -9495 | PCDI          | -6498 | FAM127B       | -3540 | DEPDC18       | -612 | GPRI3         | 3158 | LPP           | 10800 |
| HNRNP4L       | -9494 | PCOLCE        | -6497 | FAM60A        | -3539 | PCNA          | -611 | PKAR          | 3159 | STY1          | 10804 |
| COA6          | -9493 | CCZ1 /// CCZ1 | -6496 | DNAJC10       | -3538 | LPHN1         | -610 | FDC4          | 3160 | LINC00478     | 10805 |
| PMAIP1        | -9492 | RELL1         | -6495 | GN64          | -3537 | USP39         | -609 | CEP112        | 3161 | TBK2          | 10808 |
| AKT2          | -9490 | ARHGFB39      | -6494 | CTD-2292M11   | -3536 | GDAP1         | -608 | LOC10050591   | 3162 | LOC155060 /// | 10812 |
| UHRF1         | -9489 | ELL3          | -6493 | PRIM2         | -3535 | CBR4          | -607 | TPBG          | 3163 | ICA1          | 10813 |
| CEBF205       | -9488 | ZNF233        | -6492 | STK35         | -3534 | TCF19         | -606 | C1orf21       | 3164 | KALRN         | 10815 |
| SPS4K1        | -9487 | GOK3          | -6491 | CEACCG        | -3533 | CENPO         | -605 | PKM3P1        | 3165 | PKNOX1        | 10817 |
| ZCCHC8        | -9486 | VCPIP1        | -6490 | C4orf33       | -3532 | RAE1          | -604 | LILRB3        | 3166 | CNGB1 /// LOC | 10818 |
| CDADC1        | -9485 | HAU56         | -6489 | MTRM4         | -3531 | COP53         | -603 | MLYCD         | 3173 | AVL9          | 10826 |
| RNASEH2C      | -9484 | SOC52         | -6488 | ZNF318        | -3530 | ARL6IP6       | -602 | CBL           | 3174 | MIF           | 10829 |
| BRMS1L        | -9483 | COX15         | -6487 | POLR2G        | -3529 | ABI2          | -601 | ITGB6 /// LOC | 3175 | IPW /// LOC10 | 10840 |
| CYP20A1       | -9482 | LAS1L         | -6486 | FAMC9         | -3528 | SYNRG         | -600 | GLUD2         | 3178 | SMAD3         | 10841 |
| CT /// MIR1   | -9481 | IBP1-1        | -6485 | CHMP1A        | -3527 | DNM1L         | -599 | LOC10192881   | 3179 | ARBC3         | 10842 |
| Clorf29       | -9480 | TRIM33        | -6484 | PHF5A         | -3526 | BCO11086      | -598 | LOC10050661   | 3180 | TP53BP1       | 10857 |
| LOC10050721   | -9479 | HDXFRP3       | -6483 | PRRC2A        | -3525 | TCEB1         | -597 | TP53TG5       | 3181 | HR            | 10865 |
| UFCL1         | -9478 | POGK          | -6482 | TTG30B        | -3524 | RFK3          | -596 | LARP4B        | 3183 | TRPM3         | 10866 |
| SBDS /// SBDS | -9477 | ZNF518A       | -6481 | PAX6          | -3523 | INVS          | -595 | NPYGR         | 3184 | IL2ORA        | 10868 |
| LETM1         | -9476 | STAG3L1 /// S | -6480 | NAT8L         | -3522 | OPA1          | -594 | ZNF219        | 3185 | SYT12         | 10872 |
| CNIH4         | -9475 | SLC52A2       | -6479 | DNM1L         | -3521 | TAF9          | -593 | CBX7          | 3186 | ITGA11        | 10874 |
| KCNB1         | -9474 | LOC80154      | -6478 | NLUDC         | -3520 | KHORBS1       | -592 | STMN4         | 3188 | FNM2          | 10879 |
| RAD9A         | -9473 | MAREP2        | -6477 | HNRNP8        | -3519 | MRLP50        | -591 | CNN2P10 ///   | 3190 | NPAS3         | 10884 |
| EIOVL4        | -9472 | GOPC          | -6476 | KIAA1143      | -3518 | ELF2          | -590 | FAM230B       | 3192 | SUN5          | 10885 |
| KIT           | -9471 | SFXN4         | -6475 | PAICS         | -3516 | ATP2C1        | -589 | LINC00520     | 3194 | RAB30         | 10887 |
| TRLP3         | -9470 | ARMC2-AS1 /// | -6474 | NDUFB6        | -3515 | CENPA /// SLC | -588 | C7            | 3195 | ENOX2         | 10890 |
| RUC1          | -9469 | CACUL1        | -6473 | MRFPS18C      | -3514 | ZNF519        | -587 | LOC10192927   | 3197 | GNM3          | 10893 |
| RNF146        | -9468 | MANEA         | -6472 | ZKSCAN1       | -3512 | VDAC3         | -586 | MIR4          | 3198 | LOC244        | 10896 |
| SMIM7         | -9467 | CIPC          | -6471 | MLSTR         | -3512 | DPSY4         | -585 | SPATA32       | 3199 | SNCA          | 10897 |
| STX1A         | -9466 | TAB3          | -6470 | CAMTA1        | -3511 | GTSE1         | -584 | CLEC14A       | 3200 | BAD           | 10901 |
| NOL12         | -9465 | ANAPC1 /// LC | -6468 | BCLAF1        | -3510 | TMOD1 /// TS  | -583 | EGFR          | 3202 | CNTN1         | 10906 |
| PPP2R2D       | -9464 | CLDNND1       | -6467 | PSMB5         | -3509 | DPY7          | -582 | CKAR          | 3203 | YME1L1        | 10920 |
| FBLN18        | -9462 | Clorf713      | -6466 | DNMT1         | -3508 | KBTBD4 /// P1 | -581 | NRP2          | 3204 | ITGB1         | 10921 |
| LOC10028849   | -9461 | ZKSCAN1       | -6465 | ZKSCAN1       | -3507 | PHF4          | -580 | HNF1B         | 3205 | NUP214        | 10938 |
| PKP4          | -9460 | MFSDB         | -6464 | RNF41         | -3506 | CEACCG        | -579 | TUBAL3        | 3206 | FOXO2         | 10942 |
| FUT1          | -9459 | PCHD9         | -6463 | PGRMC2        | -3505 | ZNF551        | -578 | ATOH8         | 3208 | ZNF19         | 10943 |
| SELL3         | -9458 | CIZ1          | -6462 | C16orf87      | -3504 | RF2C          | -577 | AQP9          | 3209 | SLC7A2        | 10949 |
| DENN4C        | -9457 | FBXW9         | -6461 | CEP57         | -3503 | FAM149A       | -576 | PLEC          | 3210 | CARD11        | 10950 |
| LOC83861      | -9456 | DDX31         | -6460 | SENP3 /// SEI | -3502 | C17orf75      | -575 | STAT3         | 3211 | NTSDC4        | 10959 |
| RAB40B        | -9455 | MIR1292 /// T | -6459 | UBA5          | -3501 | RP11-1094M1   | -574 | FKBP3         | 3212 | PAX1          | 10960 |
| PA2GAP2 ///   | -9454 | CMSS1         | -6458 | FIP1L1        | -3500 | C11orf30      | -573 | HRH1          | 3214 | GFGR2         | 10961 |
| SLC39A6       | -9453 | MEI52         | -6457 | SOC55         | -3498 | IFT74         | -572 | LOC10050555   | 3215 | CD59          | 10968 |
| RNF103        | -9452 | FLJ46875      | -6456 | TMEM33        | -3497 | CDKN2A        | -571 | PODN          | 3216 | LOC727820     | 10984 |
| FLJ10038      | -9451 | KLHL10        | -6455 | BCL11A        | -3496 | KLHL8         | -570 | GRM5          | 3219 | RARG          | 10988 |
| STAU1         | -9450 | FAN1          | -6454 | PCK2          | -3495 | RFB0X1        | -569 | LOC221814     | 3220 | GULP1         | 10990 |
| SN            | -9449 | G453          | -6453 | LOC10050646   | -3494 | ZNF542P       | -568 | RNF15         | 3221 | LOC1095       | 11023 |
| DPSY19L       | -9448 | G453          | -6452 | LOC10050755   | -3493 | RUVBL2        | -566 | ORBB8         | 3222 | PDE7B         | 10996 |
| POLR2E        | -9447 | ZNF737        | -6451 | BLOC155 /// T | -3492 | CAAP1         | -565 | FAM9C         | 3224 | C19orf26      | 10997 |
| AMACR /// C1  | -9446 | GPATCH2L      | -6450 | SCOC          | -3491 | PLA2G12A      | -564 | LOC10192776   | 3225 | MKL2          | 10998 |
| POLR1E        | -9445 | MCM4          | -6449 | HSBP1         | -3490 | RP5-1074L1.4  | -563 | FAM199X       | 3226 | LOC10192930   | 11002 |
| MPPH1         | -9444 | GBAS          | -6448 | NUP62         | -3489 | MIR4697 /// T | -562 | CYP2A13       | 3228 | UBE2H         | 11003 |
| CKK1A /// C1  | -9443 | MACROD1       | -6447 | BCL11A        | -3488 | SP4           | -561 | FAM46A        | 3230 | TMM4B         | 11004 |
| EIF3F         | -9442 | CLZorf45      | -6446 | KIAA1715      | -3487 | MAD2L1        | -559 | TLR2          | 3231 | C12orf49      | 11005 |
| STRN          | -9441 | RNMTL1        | -6445 | TNRC6C        | -3486 | ORCA          | -546 | LOC10050640   | 3232 |               |       |

|               |       |               |       |               |       |               |      |              |      |               |       |
|---------------|-------|---------------|-------|---------------|-------|---------------|------|--------------|------|---------------|-------|
| BAI3          | -9404 | POM121C       | -6410 | G3BP2         | -3450 | METT12A /// I | -523 | TRIM63       | 3276 | CAMSAP1       | 11192 |
| SUCLA2        | -9403 | VP537A        | -6409 | ZNF226        | -3449 | CNOT6         | -522 | TCF7L2       | 3277 | UBE2H         | 11196 |
| DBT           | -9402 | GEMIN7        | -6408 | ZBTB805       | -3448 | NCAPG         | -521 | LOC10192908  | 3278 | TRPM3         | 11198 |
| SMU1          | -9401 | ZBTB10        | -6407 | RANBP2        | -3447 | RANBP2        | -520 | NCS1         | 3281 | RALGAP5       | 11204 |
| RP57          | -9400 | TLK2          | -6406 | ZMYM3         | -3446 | TMEM186       | -519 | TRIM5        | 3283 | PECAM1        | 11207 |
| TRBG1         | -9399 | ACTR1A        | -6405 | CDKN1B        | -3445 | HNRNP3A ///   | -518 | EPH4         | 3285 | RNF219        | 11218 |
| FAM132B       | -9398 | RP11-363E7.4  | -6404 | ZMIZ1         | -3444 | TSN           | -517 | GYPB         | 3286 | FAM162A       | 11220 |
| SLC25A6       | -9397 | DNAJA1        | -6403 | GPR173        | -3443 | CEP78         | -516 | RNF39        | 3287 | MBDO          | 11222 |
| SPAG9         | -9396 | IPP           | -6402 | ACP1          | -3442 | DDX46         | -515 | METTL20      | 3288 | GUSB          | 11230 |
| NR2E2         | -9395 | LAPTM4B       | -6401 | FMF5          | -3435 | TIP2          | -514 | PRDM2        | 3290 | ITPB8         | 11232 |
| TCEB2         | -9394 | PTGR2 /// ZNF | -6399 | ZNF668        | -3440 | C17orf100     | -513 | TCF2         | 3291 | TCF10L        | 11233 |
| ACTR2         | -9393 | SGCG          | -6398 | SNX4          | -3439 | LRR1          | -512 | TSPYL2       | 3292 | ATP9B         | 11241 |
| LOC10028889   | -9392 | PSMD10        | -6397 | SMCH01        | -3438 | PTPLAD1       | -511 | KIAA1257     | 3293 | GA2           | 11246 |
| GLS2          | -9391 | TMEM60        | -6396 | NUP85         | -3437 | TTK           | -510 | ITGB8        | 3295 | ATXN7L1       | 11247 |
| ITGB1         | -9390 | ZNF780A       | -6395 | PANK1         | -3436 | UBE2V2        | -509 | CYP2C9       | 3296 | PPP2R1B       | 11256 |
| ATA01         | -9389 | LSG1          | -6394 | FMF5          | -3435 | FUBP3         | -508 | CLEC1B       | 3297 | ATP10A        | 11260 |
| CSK3B         | -9388 | ARFIP1        | -6393 | RNKL28        | -3434 | CRCP          | -507 | CAPZ1        | 3299 | PLK3          | 11263 |
| MST01 /// M   | -9387 | ZNF382        | -6392 | ABCA11P       | -3433 | C22orf39      | -506 | IC1A         | 3300 | SP100         | 11265 |
| ZNF134        | -9386 | PATZ1         | -6391 | FAM204A       | -3432 | THOC6         | -505 | LOC10272507  | 3302 | ANKRD50       | 11270 |
| ATP6V1G1      | -9384 | FBX03         | -6390 | MYEF2         | -3431 | RP11-226L15   | -504 | CNTN6        | 3304 | PDE1A         | 11271 |
| HGS           | -9383 | BNIP2         | -6389 | HLTF          | -3430 | HAUS6         | -503 | EMP1         | 3305 | CNOT2         | 11277 |
| RNF115        | -9382 | KPNA1         | -6388 | CDT1          | -3429 | HILPDA        | -502 | RP11-109E24  | 3306 | G3BP1         | 11279 |
| PRD01         | -9381 | SMI2L2        | -6387 | DHXB3         | -3428 | PAM16         | -501 | ARRB1        | 3307 | FOXP2         | 11282 |
| RAB28         | -9380 | SDHA          | -6386 | USP14         | -3427 | AGO2 /// CAS  | -500 | CYSLTR2      | 3308 | ANKRD29       | 11284 |
| ELP3          | -9379 | C3orf14       | -6385 | PPIG          | -3426 | CHEK1         | -499 | HIC1         | 3309 | UHRF1BP1      | 11286 |
| GT2H3         | -9378 | PHF23         | -6384 | AKT1S1        | -3425 | NABP2         | -498 | DYNLRB1      | 3311 | MDM2          | 11294 |
| SUPT7L        | -9377 | PNMAL1        | -6383 | C19orf52      | -3424 | COX5A         | -497 | LOC1009671   | 3312 | STXBPS-AS1    | 11299 |
| INTS9         | -9376 | CRK           | -6382 | GPALP1        | -3423 | ICE2          | -496 | HMGAP1P ///  | 3313 | KCNJ1         | 11301 |
| HMGCL1        | -9375 | IPOT          | -6381 | NABP11        | -3422 | CENB2         | -495 | FLJ11292     | 3314 | SRR1          | 11316 |
| CKD12         | -9374 | PHF20L1       | -6380 | C18orf32 ///  | -3421 | TM5OS         | -494 | FAM109A      | 3315 | RORA          | 11317 |
| EMLE          | -9373 | DDX10         | -6379 | TMEM169       | -3420 | STAG1         | -493 | RP5-1184F4.5 | 3316 | AAGAB         | 11318 |
| OXLD1         | -9372 | PIA1          | -6378 | DYNNL2        | -3419 | PSMCP3P       | -492 | KLK4         | 3317 | WNT2B         | 11324 |
| ZNF20 /// ZNF | -9371 | ZSCAN22       | -6377 | C11orf81      | -3418 | PHAX          | -491 | BMS1P20      | 3318 | CTS5          | 11344 |
| ANAPC15       | -9370 | THAP11        | -6376 | MIR4784 ///   | -3417 | PHF3          | -490 | ZBTB10       | 3319 | ADAMTS9-AS2   | 11346 |
| LOC42852      | -9369 | YPM1          | -6375 | PSFC1         | -3416 | TUG1          | -489 | ELAC2        | 3322 | SPON1         | 11355 |
| ITFG2 /// LOC | -9368 | SLC35A1       | -6374 | UXS1          | -3415 | TM5B15A ///   | -488 | PVR          | 3324 | TNIP2         | 11359 |
| SPOPL         | -9367 | RBM28         | -6373 | ABC810        | -3414 | CAMSAP1       | -487 | GKN2         | 3325 | GUS3          | 11364 |
| CAND1         | -9366 | PCYOX1L       | -6372 | TRAPP2        | -3413 | DAAM1         | -486 | DENND2C      | 3326 | OR2H1         | 11366 |
| KDMA5         | -9365 | SARM1         | -6371 | WDR47         | -3412 | TAF11         | -485 | PRRX1        | 3327 | SLC25A28      | 11368 |
| ARHGAP32      | -9364 | FBXK6         | -6370 | HAT1          | -3411 | IOCE          | -484 | SLC7A13      | 3328 | DCUN1D1       | 11375 |
| NEMF          | -9362 | TRIO          | -6369 | TRAF2         | -3410 | TRAF2         | -483 | CHST5        | 3329 | TRAF2         | 11377 |
| ZNF426        | -9361 | TRD           | -6368 | DCAF16        | -3409 | INGS          | -482 | NPAS2        | 3331 | ARRB1         | 11383 |
| ABCA2         | -9360 | VANGL2        | -6367 | MED30         | -3408 | MSANTD4       | -481 | NKX6-3       | 3333 | OSGIN2        | 11386 |
| YTHDC1        | -9359 | FAM115A ///   | -6366 | MTF2          | -3407 | ZGRF1         | -480 | AP00117.1    | 3334 | BUD31         | 11391 |
| TMEM134       | -9358 | LINC00847     | -6365 | SLC37A3       | -3406 | INA           | -479 | MCM3AP       | 3336 | SEMAGA        | 11392 |
| PIGY /// PVUR | -9356 | LOC10272415   | -6364 | ZNF821        | -3405 | LCLAT1        | -477 | ENDOV        | 3338 | BAGE          | 11393 |
| LOC83788      | -9355 | LAPTM4B       | -6363 | HNRNPA2B1     | -3404 | KAT908        | -476 | HNRNPA2B1    | 3339 | TCF7L2        | 11395 |
| VP53          | -9354 | CKD12         | -6362 | LOC10106031   | -3403 | EXL1          | -475 | CITSD2       | 3341 | LPXAT2        | 11397 |
| H3F3A /// H3  | -9353 | NUP93         | -6361 | ZNF71         | -3402 | LSM2          | -474 | FOXN3        | 3342 | LAR1          | 11407 |
| NRXN2         | -9352 | KIF5B         | -6360 | PSMD12        | -3401 | CEN2E         | -473 | PAX1         | 3344 | PLAZR1        | 11409 |
| DYNLRB1       | -9351 | PHACTR4       | -6359 | LINC00262 /// | -3400 | MED29         | -472 | DCAF6        | 3345 | JADE2         | 11413 |
| RRP15         | -9350 | CKN2AIPNL     | -6358 | TMEM222       | -3399 | LSG1          | -471 | PRKDC        | 3346 | LOC10050647   | 11417 |
| PCFG2         | -9349 | SNY28P /// S  | -6357 | RFK           | -3398 | RRP36         | -470 | CLTA         | 3347 | IPW /// LOC10 | 11422 |
| FL2           | -9348 | LOC10272422   | -6356 | LRKCS7        | -3397 | FADS1 /// MIF | -469 | MIR6787 ///  | 3348 | SLC14A5       | 11445 |
| EIF3X         | -9347 | HP1BP3        | -6355 | MIS12         | -3396 | CREZF2        | -468 | MT4          | 3350 | S100A7A       | 11449 |
| MYLDC         | -9346 | TP53BP1       | -6354 | GTPBP4        | -3395 | SNRNP27       | -467 | TMEM45B      | 3351 | UBN2          | 11455 |
| RAB10         | -9345 | LEPROT        | -6353 | BAZ1A         | -3394 | POLR2D        | -466 | SPTAN1       | 3352 | E2F2          | 11460 |
| BNIP3L        | -9344 | AKO57657 ///  | -6351 | USP1          | -3393 | UGGT1         | -465 | LRRCL17      | 3353 | MKLN1         | 11463 |
| LOC10159334   | -9343 | FGF14-AS2     | -6350 | FAM83B        | -3391 | AURKA         | -463 | BC052578 /// | 3355 | RP58KA4       | 11464 |
| SEMAPD        | -9342 | IFIT2         | -6349 | ITFB2         | -3390 | KATNB1        | -462 | CDP1         | 3356 | LOC101199     | 11479 |
| NIPBL         | -9341 | FMR1          | -6348 | MAP7D2        | -3389 | PRRF40A       | -461 | LOC10012902  | 3357 | ABHD17B       | 11487 |
| FBX09         | -9340 | NUCKS1        | -6347 | NCOA5         | -3388 | CENJ          | -460 | HSPA1L       | 3358 | LOC10050640   | 11491 |
| NCKIP5D       | -9339 | AP2B1         | -6346 | TFDP1         | -3387 | ZNF510        | -459 | TBXA2R       | 3360 | LATS2         | 11493 |
| PTPN4         | -9338 | LOC10272501   | -6345 | VCE           | -3386 | MCM10         | -457 | TRIM29       | 3361 | GFAC          | 11494 |
| POU2          | -9337 | TMEM30A       | -6344 | KORC11L       | -3385 | ARG2          | -456 | LINC00320    | 3362 | TNR /// GJA9  | 11497 |
| SMC6          | -9336 | SPAT1         | -6343 | CDK1          | -3384 | LRP1          | -455 | CCDC159      | 3363 | NROB1         | 11510 |
| UIMC1         | -9335 | ZNHIT2        | -6342 | PSD3          | -3383 | CDK19         | -454 | PSGA /// PSG | 3365 | MEX3D         | 11514 |
| PASK          | -9334 | RNF27         | -6341 | TMEM148       | -3382 | DBN1          | -453 | SMIM21       | 3368 | LRCH4         | 11515 |
| TMCO6         | -9333 | ZNF713        | -6340 | BAG5          | -3381 | DHFR          | -452 | SLC7A11-AS1  | 3369 | SLC25A51      | 11525 |
| R3HCC1L       | -9332 | H0XAA         | -6339 | MIR1244-3     | -3380 | PRRF4B        | -451 | LOC285766    | 3370 | LINC00598     | 11536 |
| TIAM1         | -9331 | HELZ          | -6338 | LOC154        | -3379 | WSCR22        | -450 | LINC00305    | 3372 | UNC80         | 11539 |
| ERBP1         | -9330 | OP41          | -6337 | ZNF290        | -3378 | ZNF290        | -449 | SLC11A1      | 3374 | ANKK6         | 11546 |
| TMEM251       | -9329 | NRTN          | -6336 | CDC4A         | -3377 | LINC51A       | -448 | JADE2        | 3375 | TTBK2         | 11551 |
| DPDC          | -9328 | POLR3C        | -6335 | PCDH814       | -3376 | TRC           | -447 | LOC10012788  | 3377 | DLG4          | 11552 |
| TRO           | -9327 | TRPT1         | -6334 | SLITRK1       | -3375 | KIF3A         | -446 | TCF25        | 3378 | ORAI2         | 11555 |
| BMF           | -9326 | IMP2          | -6333 | NUP107        | -3374 | DDX25         | -445 | TCRA /// TCR | 3379 | VSTM4         | 11561 |
| SCAMP1        | -9325 | ZNF248        | -6332 | ZBTB34        | -3373 | ZNF562        | -444 | FN1          | 3380 | RBP1          | 11579 |
| XRN2          | -9324 | PHB8          | -6331 | NKX3-1        | -3372 | NKX3-1        | -443 | LAR1         | 3381 | FERL14        | 11584 |
| C11orf31      | -9323 | MPI           | -6330 | DFNB59        | -3371 | TIGD2         | -442 | ZFP92        | 3382 | TRAF2         | 11585 |
| COPZ1         | -9322 | YY1AP1        | -6329 | FASKT03       | -3370 | RADS1C        | -441 | DAOA-AS1     | 3383 | CALD1         | 11593 |
| MIA3          | -9321 | SMC1A         | -6328 | PMS2 /// PM   | -3369 | ACP1          | -440 | ADAMTS13     | 3386 | ITPR2         | 11594 |
| NDNL2         | -9320 | SEC62         | -6327 | PTCD3         | -3368 | TSN           | -439 | MYOCD        | 3387 | SOS1          | 11600 |
| KLF1 /// CKLF | -9319 | NPR1          | -6326 | NUP98         | -3367 | C6orf136      | -438 | GVN1P1       | 3388 | KIAA1217      | 11603 |
| RAB18         | -9318 | DCR8 /// MII  | -6325 | PHF3          | -3366 | NAAS5         | -437 | RP11-94D1.2  | 3389 | ARHGAP19      | 11604 |
| RUS1          | -9317 | GT2H3         | -6324 | COL1          | -3365 | COL1          | -436 | CDCL5        | 3390 | PHM1          | 11606 |
| DNAJC21       | -9316 | ZNF568        | -6323 | SLXAP         | -3364 | GALNT12       | -435 | MTFHD1L      | 3391 | MGST3         | 11606 |
| PCF1          | -9315 | POU4F1        | -6322 | MALSU1        | -3363 | DIAPH3        | -434 | FAM63A       | 3392 | ZNF821        | 11610 |
| LONRF2        | -9314 | PHF21B        | -6321 | TMEM161B      | -3362 | SPC25         | -433 | MED14        | 3393 | SOCS7         | 11616 |
| ZNF530        | -9313 | IKZF4         | -6320 | MAGI2         | -3361 | CRNK1         | -432 | S100A7A      | 3394 | LMO4          | 11619 |
| UBE2Z         | -9311 | PUM1          | -6319 | MTERF2        | -3360 | FANCL         | -431 | ERBB2        | 3395 | FN1           | 11627 |
| PIPD          | -9310 | ESR1          | -6318 | NCBP2         | -3359 | CARSP1        | -430 | MIR21 /// VM | 3396 | CD33          | 11633 |
| WBP11         | -9309 | UBE2D3        | -6317 | GLN3          | -3358 | ER13          | -429 | PDLIM4       | 3397 | SUSD4         | 11636 |
| ARIH1         | -9308 | TMEM107       | -6316 | BC12          | -3357 | RUNDC1        | -428 | EGFR         | 3400 | JMJ04         | 11639 |
| RP11-513M11   | -9307 | LIG3          | -6315 | DNAUC19       | -3356 | PBK           | -427 | DCN          | 3402 | CP5F2         | 11655 |
| PCSKIN1       | -9306 | INTS4         | -6314 | CUTA          | -3355 | RR11-4883.4   | -426 | KKR8         | 3405 | SFRP4         | 11657 |
| NELFD         | -9305 | TM5B15B       | -6313 | HRA5L5        | -3354 | CENPP /// LOK | -425 | LD3A /// TCR | 3407 | ARHGAP5       | 11670 |
| ZHMC21        | -9304 | RPL21 /// BC1 | -6312 | TRD           | -3353 | TRD           | -424 | ARRIGF12     | 3408 | LOC1005098    | 11675 |
| WTAP          | -9303 | HMGCR         | -6311 | ZNF740        | -3352 | HNRNP3A ///   | -423 | WLS          | 3409 | NUD17L        | 11688 |
| SMEX2         | -9302 | PIF           | -6310 | PRPF6         | -3351 | ACTL6B        | -422 | OPN5         | 3411 | WDR60         | 11697 |
| WNK3          | -9301 | MYYN          | -6308 | MZT1          | -3350 | PRR14L        | -421 | TNFSF10      | 3412 | BMPR1A        | 11705 |
| SPATS2        | -9300 | KDM4C /// KD  | -6307 | DENND6A       | -3349 | PGAP1         | -420 | BCD43355 /// | 3413 | ATP1B4        | 11707 |
| EIF38         | -9299 | SRR           | -6306 | COA1          | -3348 | PTPLAD1       | -419 | KCNK5        | 3414 | FBXW2         | 11710 |
| NDUFS1        | -9298 | SLMO4         | -6305 | ZRANB1        | -3347 | TM5           | -418 | CLMN         | 3415 | CAR1          | 11716 |
| PCP3          | -9297 | ILVLB         | -6304 | GTPBP8        | -3346 | NASP          | -417 | ZTRK2        | 3417 | IFNGR1        | 11718 |
| SRM           | -9296 | SPTAN1        | -6303 | HNRNP3A       | -3345 | POLD3         | -416 | PTAFR        | 3418 | DSG3          | 11722 |
| FAM162A       | -9295 | MORC2         | -6302 | ATP6V1G2      | -3344 | TTCC2-AS1     | -415 | CRISP1       | 3419 | SLC30A5       | 11726 |
| TMED7 /// TM  | -9294 | RABEP1        | -6301 | PDS5A         | -3343 | FAM216A       | -414 | FABP4        | 3420 | URB1          | 11727 |
| CXorf23       | -9293 | SNORA5B ///   | -6300 | FAM126A       | -3342 | CDK5RAP2      | -413 | AGTRAP       | 3423 | ZFP3611       | 11731 |
| PITH1         | -9292 | USP2          | -6299 | ZKSCAN8       | -3341 | TMUNP02       | -412 | ANKTR1       | 3424 | IPDS          | 11749 |
| TUBGCP3       | -9291 | FAM126A       | -6298 | UGT1          | -3340 | ZNF33A        | -411 | ZNF33A       | 3427 | ABC86         | 11751 |
| THADA         | -9290 | TROAP         | -6297 | KIAA1715      | -3339 | LOC10192933   | -410 | MEG3         | 3428 | GRAPL         | 11755 |
| BIRC5 /// EPR | -9289 | NAB1          | -6296 | IFT80         | -3338 | ORC2          | -409 | CCDC71L</    |      |               |       |

|               |       |               |       |              |       |                |      |               |      |                |       |
|---------------|-------|---------------|-------|--------------|-------|----------------|------|---------------|------|----------------|-------|
| CHRNA1        | -9253 | SABF2         | -6260 | SEZ6L        | -3304 | AGPAT1         | -375 | MROH2B        | 3468 | DERL3          | 11941 |
| TCEB2         | -9251 | ENOX2         | -6259 | KBTB06       | -3303 | RALGPS1        | -374 | LOC10099676   | 3469 | POLR2B         | 11943 |
| ALG14         | -9251 | PP1R2         | -6258 | TBR2         | -3302 | DGUC0          | -373 | LINC00328     | 3470 | ASMTL-AS1      | 11945 |
| CHGA          | -9249 | KRT8          | -6257 | YOMM70A      | -3301 | ADNP2A         | -372 | WN116         | 3471 | CLDN19         | 11946 |
| FBXO25        | -9248 | ARID4B /// RB | -6256 | DHFR         | -3300 | YEAT54         | -371 | AP001062.7    | 3474 | SSPN           | 11951 |
| DOOST         | -9247 | MRPS15        | -6255 | TOP3A        | -3299 | ZNF180         | -370 | KLK7          | 3475 | MEG3           | 11952 |
| GMEB1         | -9246 | HMGCR         | -6254 | RP11-47319.9 | -3298 | LYSMD2         | -369 | CCDC37-AS1    | 3476 | MITF           | 11954 |
| Csor55        | -9244 | PPCDC         | -6253 | PBRM1        | -3297 | NKIRAS2        | -368 | VWA3A         | 3477 | ZNF594         | 11973 |
| PAP07         | -9243 | NYFC          | -6252 | EZF2         | -3296 | HNI            | -367 | CYP2C9        | 3478 | SFI            | 11983 |
| ENAH          | -9240 | ARID2         | -6250 | SLMO1B       | -3295 | SRD9U1         | -367 | YBK3          | 3479 | IFPB8          | 11988 |
| CDC73         | -9241 | TPP2          | -6249 | ZNF43        | -3294 | AL10r157       | -365 | GHLR          | 3481 | PCBP1-AS1      | 11989 |
| CLNS          | -9240 | PUM1          | -6248 | CHRNA3       | -3293 | TMEM108        | -364 | CRYAB         | 3483 | CEACAM1        | 11995 |
| ZNF141        | -9239 | ARID4B        | -6247 | SERBP1       | -3292 | HELLS          | -363 | KLK3          | 3484 | IGF1           | 11999 |
| APSS1         | -9238 | DPY30         | -6246 | TGS1         | -3291 | CBLL1          | -362 | ZNF862        | 3485 | CTNM3          | 12001 |
| SERTAD4       | -9237 | CHKA          | -6245 | RSBN1        | -3290 | BU1B18         | -361 | E2F4          | 3486 | IL1RN          | 12006 |
| GNAS          | -9236 | KIF15         | -6244 | ZNF174       | -3289 | LBR2B          | -360 | SYNGR2        | 3488 | SLC52A3        | 12020 |
| TCOF1         | -9235 | NMT2          | -6243 | GPX7         | -3288 | DMY1           | -359 | MRC2          | 3489 | C15orf49       | 12021 |
| ACAD8         | -9234 | ABHD10        | -6242 | DNAH14       | -3287 | RNA5H2B        | -358 | DNAAF1        | 3491 | GAS7           | 12030 |
| DSTYK         | -9233 | ZC3H14        | -6241 | TNRC6B       | -3286 | COO7           | -357 | LOC10192771   | 3492 | PBOV1          | 12032 |
| SARNP         | -9232 | BICD1         | -6240 | EMC8         | -3285 | EMC1           | -355 | C9orf84       | 3495 | LINC01187      | 12033 |
| Csor42        | -9231 | PTPN11        | -6239 | PIIE         | -3284 | ZNF576         | -354 | HSPB6         | 3496 | LOC10050640    | 12043 |
| RBM22         | -9230 | MRPL13        | -6238 | PDE6B        | -3283 | TM5815A ///    | -353 | KIF6          | 3497 | C10orf128      | 12044 |
| FAM43B        | -9229 | MRPS18A       | -6237 | PGRM2        | -3282 | MC1010         | -352 | KLFB          | 3498 | FZD4           | 12045 |
| RPL22         | -9228 | PCBP1-AS1     | -6236 | CAND1        | -3281 | FBXO5          | -351 | CERS3         | 3499 | MUC12          | 12046 |
| COMM10        | -9227 | MDK           | -6235 | C11orf58     | -3279 | TIMM17B        | -350 | IFFO1         | 3501 | CEACAM1        | 12051 |
| PGK1          | -9224 | USP38         | -6234 | DCTP1        | -3278 | FAM217B        | -349 | LINC00908 /// | 3502 | PTPN11         | 12060 |
| POT1          | -9223 | C7orf73       | -6233 | FOXO6        | -3277 | FAM115A ///    | -348 | PHF6          | 3503 | LZTS1          | 12063 |
| SIAH3         | -9222 | RBP1          | -6232 | HSP9A        | -3276 | LPHN1          | -347 | C3orf62       | 3504 | HIFNT          | 12064 |
| IBF9 /// RNF3 | -9221 | DLX4          | -6231 | C2orf42      | -3275 | CHAF1A         | -346 | TSIB          | 3505 | FRS2           | 12066 |
| NSUN5F1       | -9220 | TIMM44        | -6230 | LROR         | -3274 | SFPO           | -345 | HRH4          | 3506 | PRIM2 /// PRII | 12068 |
| AP2A1         | -9219 | SCAI          | -6229 | KLCL1        | -3273 | HSPA9          | -344 | KNCN          | 3507 | HNF4G          | 12069 |
| LOC10192924   | -9218 | AKNA1         | -6228 | CELF1        | -3272 | ELAVL2         | -343 | CENPBD1 ///   | 3508 | ARVCF          | 12074 |
| HSDL2         | -9217 | IKBP          | -6227 | CP5F6        | -3271 | FANCC          | -342 | TMEM132A      | 3509 | E2F7           | 12078 |
| TRAP1         | -9216 | LOC10192871   | -6226 | PDE6B        | -3270 | POLR2D         | -341 | TSPAN32       | 3510 | ZNF107         | 12084 |
| TP73          | -9215 | CAAP1         | -6225 | MED4         | -3269 | NRSN2          | -340 | MIR612 /// N  | 3511 | STAT2          | 12086 |
| SXNS          | -9214 | THSD7A        | -6224 | EPMA2IP1     | -3268 | MRPL11         | -339 | ALOX12P2      | 3512 | GRB2           | 12098 |
| SATB1         | -9213 | PSPH          | -6223 | PGM2L1       | -3267 | ANAPC1 /// L   | -338 | PLACA         | 3513 | ITIH4          | 12099 |
| NIN           | -9212 | MRPL57        | -6222 | UCK1         | -3266 | PAIP1          | -337 | TNS1          | 3515 | MAP2K5         | 12112 |
| LOC153546     | -9211 | ZNF397        | -6221 | SF3B6        | -3265 | TUBB           | -336 | ETV1          | 3516 | CDC80          | 12117 |
| GUSBP1 /// G  | -9210 | LEM02         | -6220 | DCAF12       | -3264 | C8orf33        | -335 | MS4A3         | 3518 | HSPA9          | 12121 |
| ETFBH         | -9209 | LARP1         | -6219 | GLB1         | -3263 | DHRS4          | -334 | DHRS4-AS1     | 3519 | ITIH4          | 12122 |
| CHN2          | -9208 | CNNM2         | -6218 | GLB3         | -3262 | FEM1B          | -333 | NMBR          | 3520 | PPARGC1A       | 12124 |
| ZNF880        | -9207 | POLR2B        | -6217 | UBE3A        | -3261 | GPRIN1         | -332 | KRTAP19-1     | 3521 | HGD            | 12125 |
| DFNA5         | -9206 | SYNCRIP       | -6216 | MRPL47       | -3260 | UBE3A          | -331 | SPRYD3        | 3522 | ATXN1          | 12127 |
| GLS2          | -9205 | ALDH6A1       | -6215 | TIMM23 /// I | -3259 | SEH1L          | -330 | WNK3          | 3523 | PDE1A          | 12132 |
| LOC39803      | -9204 | LHX9          | -6213 | ZNF254       | -3258 | POXP /// SH3   | -329 | RBM52         | 3525 | POE1A          | 12133 |
| CCP81         | -9203 | LARP1B        | -6212 | ANKRD54      | -3257 | ZNF92          | -328 | ZNF92         | 3527 | TP53           | 12134 |
| HIP1          | -9202 | TMEM131       | -6211 | DCAF13       | -3256 | CENPJ          | -327 | SVOL1         | 3528 | CELF1          | 12135 |
| COG2          | -9201 | TMEM55B       | -6210 | NIPAL3       | -3255 | LSMS           | -326 | TCTE3         | 3530 | ARNT           | 12137 |
| NEUROD2       | -9200 | CSTF2T        | -6209 | ARMCK5       | -3254 | MUT            | -325 | KRMP1         | 3531 | MDM4           | 12138 |
| E1F4E2        | -9199 | PA2G4         | -6208 | HNRNPA3      | -3253 | DCAF7          | -324 | MST1L         | 3533 | GUSBP11        | 12158 |
| ATPSG1        | -9198 | C4orf29       | -6207 | NUSAP1       | -3252 | ERIZ           | -322 | ECM2          | 3534 | HMZ            | 12160 |
| CHURC1-FNTE   | -9197 | ZNF197        | -6206 | IFZ2         | -3251 | ZNF302         | -321 | MMP14         | 3537 | GNMT           | 12168 |
| PWP1          | -9196 | CHRFAM7A ///  | -6205 | TIFA         | -3250 | DCUN1D5        | -320 | ME1           | 3538 | KIAAL654       | 12170 |
| WDR90         | -9195 | PEB1          | -6204 | TUSC3        | -3249 | ENVY2          | -319 | COL4A4        | 3539 | HNRNP42        | 12171 |
| NFATC3        | -9194 | ALG1 /// UTF  | -6203 | KPNA1        | -3248 | CENPK          | -318 | INO80D        | 3543 | LINC00642      | 12174 |
| RP11-38P22.2  | -9193 | S1orf112      | -6202 | NOLA         | -3247 | ARHGAP19       | -317 | PCGEM1        | 3544 | GSTCD          | 12177 |
| IPO9          | -9192 | SFQO          | -6201 | DIS3L        | -3246 | SESTO1         | -316 | TMEM229B      | 3545 | CEACAM1        | 12182 |
| TRIM44        | -9191 | NFA           | -6200 | TMEM136      | -3245 | GF1            | -315 | HSPB11        | 3546 | C9orf41        | 12183 |
| RP11-846E15   | -9190 | MCM8P         | -6199 | KCMAP        | -3244 | SESTO1         | -314 | UPB1          | 3547 | MIR14          | 12184 |
| GLE1          | -9189 | ZW10          | -6198 | STOX2        | -3243 | KIAA2022       | -313 | TCPL12        | 3548 | FNDC3B /// LC  | 12190 |
| KALRN         | -9188 | ZCRB1         | -6197 | PPM1L        | -3242 | FAM200B        | -312 | CD82          | 3549 | XRCC4          | 12191 |
| GF3C4         | -9187 | DCBLD2        | -6196 | MRFAF1       | -3241 | ZNF420         | -311 | SAMHD1        | 3550 | CD48           | 12195 |
| RBM25         | -9186 | PHF2          | -6195 | CAMK4        | -3240 | MDCL1          | -310 | RANBP3        | 3551 | ZNF573         | 12199 |
| VAPA          | -9185 | FGOY          | -6194 | MAZD1BP      | -3239 | GP02           | -309 | TRPM6         | 3552 | EP400NL        | 12204 |
| UNC50         | -9184 | ALKBHD10      | -6193 | BRWD1        | -3238 | C10orf54       | -308 | MET           | 3553 | IFP3L1         | 12205 |
| KKAL          | -9183 | THOP1         | -6192 | SF1          | -3237 | IQCL-SCHIP1 /- | -307 | FHAD1         | 3555 | AHNAK          | 12209 |
| KIAA1919      | -9182 | MRPL39        | -6191 | LOC642852    | -3236 | CSRP2BP /// P  | -306 | CYP3A7 /// C  | 3556 | TLR3           | 12210 |
| ZNF83         | -9181 | RLF           | -6190 | ATP6V0E2-AS  | -3235 | ATAD2          | -305 | NUTM2B        | 3557 | RMDN1          | 12216 |
| PLEKHM3       | -9180 | C1orf80       | -6189 | NOLA         | -3234 | FAM229B        | -304 | LINC00708     | 3559 | SCAF4          | 12221 |
| HAUS7 /// TR  | -9179 | C12orf29      | -6188 | NTRC         | -3233 | RADS1          | -303 | MIR17-AS1     | 3560 | HUWE1          | 12225 |
| PAK7          | -9178 | ERLIN2        | -6187 | CENPL        | -3232 | CENPL          | -302 | TRIM49 /// T  | 3561 | RN2            | 12229 |
| TPST1         | -9177 | NYFC          | -6186 | ZNF566       | -3231 | SPDL1          | -301 | AMT           | 3562 | DISP4          | 12232 |
| FUJ38379      | -9176 | GPATCH1       | -6185 | TMEM143      | -3230 | HNRNPC         | -300 | SPRY3         | 3564 | ZNF740         | 12243 |
| LOC10028849   | -9175 | RABEP1        | -6184 | CERK         | -3229 | LOC284926      | -299 | CCDC129       | 3565 | MIR612 /// NE  | 12245 |
| RP11-29H23.4  | -9174 | SOCCAG8       | -6183 | PMS2P5       | -3228 | SSX2IP         | -298 | GRIN2         | 3567 | ALB            | 12252 |
| CHFR          | -9173 | HZAFY         | -6182 | U2SURP       | -3227 | ZNHIT3         | -297 | CNH4          | 3570 | TGFA           | 12267 |
| KLF7          | -9172 | SRP2          | -6181 | TM116N11     | -3226 | NOURF8         | -296 | TM3           | 3571 | FAM88A         | 12269 |
| KDM5B         | -9171 | IFRD1         | -6180 | HSE1P1       | -3225 | SPIN4          | -295 | DAB2 /// LOC  | 3573 | TPP1           | 12273 |
| MTAP          | -9170 | CNH1          | -6179 | MVB12B       | -3224 | SNORA29 ///    | -294 | RUSC2         | 3574 | HCFC1          | 12286 |
| BMP2          | -9169 | LOC645513     | -6178 | PCDH1A /// P | -3223 | MAGOHB         | -293 | MIR143HG      | 3576 | ADAM22         | 12294 |
| POGULT1       | -9168 | GET4 /// SUN  | -6177 | LRR75A       | -3222 | LOC10192933    | -292 | ESR1          | 3579 | ENSA           | 12297 |
| GPRI07        | -9167 | ZC3H13        | -6176 | ZDHHC13      | -3221 | ZNF281         | -291 | TMCC1         | 3580 | TA6FL          | 12300 |
| SFY7201       | -9166 | GGPD          | -6175 | EMC6         | -3220 | ZNF121         | -290 | UBE3A         | 3581 | FOXP2          | 12308 |
| PACRG         | -9165 | NFEH1         | -6174 | ATP13        | -3219 | SNRPD1         | -289 | WSP2          | 3582 | SGFR           | 12311 |
| IER3P1        | -9164 | POLR3D        | -6173 | IPO5         | -3218 | RC3H2          | -288 | TM45F1        | 3583 | LINC00470      | 12315 |
| RALY          | -9163 | FIG4          | -6172 | RAB23        | -3217 | RAD17          | -287 | C1orf94       | 3584 | GPRIN1         | 12317 |
| CCDC101       | -9162 | CALML4        | -6171 | FAM92A1      | -3216 | LOC93622       | -286 | LINC00284     | 3585 | DOCK8          | 12324 |
| TRAPP3        | -9161 | UBE2I         | -6170 | KBTBD7       | -3215 | WHSC1          | -285 | DOCK5         | 3586 | KANSL3         | 12326 |
| NRXN1         | -9159 | ENO1-AS1      | -6169 | ATP8A2       | -3214 | BEZ            | -284 | LINC00488     | 3587 | CRI1           | 12332 |
| TPPA2         | -9158 | CHP1          | -6168 | MRFA1        | -3211 | MC1010         | -283 | CSNK1A513     | 3589 | MCM9           | 12341 |
| LARP6         | -9156 | NKX1          | -6167 | SEPHS1       | -3210 | ARHGAP35       | -282 | NCALD         | 3590 | FAM20A         | 12345 |
| KIAA0586      | -9155 | TAKO1         | -6166 | LUC7L2       | -3209 | CHML           | -281 | STAM2         | 3591 | SOS2           | 12346 |
| FSD1L         | -9154 | CENPBD1       | -6165 | C11orf57     | -3208 | USP37          | -280 | AK128734 ///  | 3592 | Csor15         | 12348 |
| THSD7A        | -9153 | INVS1ABP      | -6164 | IFNAR1       | -3207 | FANR1          | -279 | CIITA         | 3593 | LOC10050640    | 12377 |
| SBF1          | -9152 | UTP15         | -6163 | DENNDMA      | -3206 | TRIM37         | -278 | GUCA1B        | 3594 | CDK5RAP2       | 12387 |
| COO9          | -9151 | LOC10106052   | -6162 | MIR619       | -3205 | MIR619         | -277 | TMPO-AS1      | 3595 | NBP1           | 12391 |
| MAPT          | -9150 | TERF2         | -6161 | CENPO        | -3204 | C4orf27        | -276 | CD25C         | 3596 | STX            | 12397 |
| GCLM          | -9149 | LHFPL3        | -6160 | IAH1         | -3203 | HOGFRP3        | -275 | ARHGFE12      | 3597 | ERBB2          | 12399 |
| CAMTA1        | -9148 | AP2M1         | -6159 | TUBB         | -3202 | SUV420H1       | -274 | EHF           | 3598 | ITGB8          | 12400 |
| KCTD7 /// RA1 | -9147 | PGPEP1        | -6158 | DPYSL3       | -3201 | PRPF38A        | -273 | BATF2         | 3600 | SRP72          | 12412 |
| RABC5         | -9146 | RK7           | -6157 | SABF         | -3200 | IPO5P1         | -272 | LOC10192691   | 3601 | CAT            | 12414 |
| CTBP1         | -9145 | METTL14       | -6156 | PKSL         | -3199 | H2AFV          | -271 | DOCK5         | 3602 | MAGI1          | 12416 |
| C6orf62       | -9143 | SCDS          | -6155 | C14orf1      | -3198 | KCNQ2          | -270 | LOC10192714   | 3603 | EHQ2           | 12428 |
| SACS          | -9142 | LOC283713 /// | -6154 | OARD1        | -3197 | CTPS1          | -269 | HRALS2        | 3605 | ALDH1L1        | 12429 |
| STAG1         | -9141 | TAF15         | -6153 | EEF1E1       | -3196 | CBX1           | -268 | CR1L          | 3607 | IKBK           | 12442 |
| NOP14         | -9140 | LPGAT1        | -6151 | ZFR          | -3195 | TEX10          | -267 | ELK3          | 3608 | MIR93          | 12447 |
| PGM2L1        | -9139 | BK            | -6150 | KIAA0408 /// | -3194 | FAM200B        | -266 | MBO2          | 3609 | MIR613 /// S   | 12450 |
| THAP7-AS1     | -9138 | NHAI6         | -6149 | UCTB         | -3193 | SNRPC1         | -265 | COL21         | 3610 | RADS18         | 12465 |
| CDC42EP3      | -9136 | GLC1          | -6148 | LRRCS8       | -3192 | ZNF764         | -264 | STEAP4        | 3611 | APBB2          | 12472 |
| URB2          | -9135 | CCDC93        | -6147 | SGCB         | -3191 | HDAC2          | -263 | PPARGC1A      | 3612 | MCTS1          | 12475 |
| PSME3         | -9134 | LN7C          | -6146 | ZIK1         | -3190 |                |      |               |      |                |       |

|              |       |             |       |               |       |               |      |               |      |               |       |
|--------------|-------|-------------|-------|---------------|-------|---------------|------|---------------|------|---------------|-------|
| CF1          | -9100 | C7orf13     | -6112 | KPNA6         | -3155 | MGA           | -228 | KCNK2         | 3652 | TMEM126B      | 12620 |
| RAB2A        | -9099 | LGSN        | -6110 | TRMT112       | -3153 | BOD1          | -227 | KCTD17        | 3654 | EPH8A         | 12624 |
| FBXO4        | -9098 | KULH7       | -6110 | FUS           | -3152 | TMEM11        | -226 | FOLH1 /// FO  | 3655 | GPR157        | 12629 |
| LC089906     | -9097 | ANKRD3C     | -6109 | CCDC176       | -3152 | MTF2          | -225 | GALNT5        | 3657 | SHANK2        | 12632 |
| RXR8         | -9096 | MDH1B       | -6108 | CEP170 /// CI | -3151 | FRLL1         | -224 | PAPOLB        | 3658 | CFI           | 12637 |
| PPP2R5C      | -9095 | LOC202181   | -6107 | ZNF415        | -3150 | NAA40         | -223 | TAT           | 3660 | SIGLEC7       | 12645 |
| SLC30A5      | -9093 | NFASC       | -6106 | NCAHP2        | -3149 | ZNF232        | -222 | TAPPB         | 3661 | S100A10       | 12647 |
| STMN1        | -9092 | NUP205      | -6105 | EARS2         | -3148 | DDIAS         | -221 | LINC00298     | 3663 | OFCC1         | 12648 |
| ZFA51        | -9091 | MPDZ        | -6104 | C5orf42       | -3147 | ZNF420        | -220 | LINC00167     | 3664 | TKB5          | 12657 |
| ADM3A        | -9090 | PRK11       | -6103 | PCSK1         | -3146 | PO5A          | -219 | CTD-1201.17   | 3665 | CREBBP        | 12660 |
| UBE2K        | -9089 | UBE2Q1      | -6102 | ZBTB44        | -3145 | MYE2F         | -218 | AC074212.6    | 3666 | IQCF1         | 12664 |
| RCCO1        | -9088 | TFDP2       | -6101 | DZP3          | -3144 | MCM4          | -217 | TRPMA         | 3667 | PAGR1         | 12665 |
| VP553        | -9087 | PPP1R7      | -6100 | ETAA1         | -3143 | ELAVL1        | -216 | GAL           | 3668 | DGCR8 /// MIH | 12668 |
| DPF2         | -9086 | FEZ1        | -6099 | EIF2AK1       | -3142 | HN1           | -215 | MIF7          | 3670 | IL12RB1       | 12672 |
| CNVY         | -9085 | LINC00339   | -6097 | MED27         | -3141 | MXN1          | -214 | GALNT16       | 3672 | DACT3         | 12674 |
| CNV          | -9084 | MRPL18      | -6096 | MRPL18        | -3140 | DHFR          | -213 | TMEM105       | 3673 | LGIM          | 12680 |
| DEDD         | -9083 | APOM        | -6095 | LOC10050721   | -3139 | PCMT1         | -212 | NRE41         | 3674 | SCAPER        | 12683 |
| RP11-196G18  | -9082 | CSRN3       | -6094 | RAB31P        | -3138 | FAM117B       | -211 | APOL2         | 3676 | SCNN1A        | 12690 |
| PRDX3        | -9081 | TTC5        | -6093 | GABPB1-AS1    | -3137 | ENV2          | -210 | PMFBP1        | 3677 | GLS           | 12702 |
| SEPECS       | -9080 | MTTC4       | -6092 | SNAPC4        | -3136 | ERCCGL2       | -209 | TNFRSF13C     | 3679 | TTC26         | 12705 |
| LOC10028956  | -9079 | MDH2        | -6091 | NR1D2         | -3135 | RHNO1         | -208 | LINC00265 /// | 3680 | RHD13         | 12707 |
| EED          | -9078 | KULH12      | -6090 | TRIM55        | -3134 | DGAP5         | -207 | GIPR          | 3681 | SERP2         | 12709 |
| SEC24B-AS1   | -9077 | C2orf15     | -6089 | KLHDC10       | -3133 | TMEM177       | -206 | SPON1         | 3682 | SKK2          | 12743 |
| BTA1F        | -9076 | NDFIP2      | -6088 | HNRNP1        | -3132 | EPT1          | -205 | AGFG2         | 3683 | TCF3          | 12726 |
| RP11-416N2.4 | -9075 | LINC00665   | -6087 | MANBAL        | -3131 | SOX12         | -204 | IL2ORA        | 3684 | CYP2C9        | 12730 |
| DPM1         | -9074 | SMAD2       | -6085 | EIF4G3        | -3130 | THYN1         | -203 | NPHP3-AS1     | 3687 | QRS1L         | 12731 |
| ALG2         | -9073 | TFDP1       | -6084 | LIG3          | -3129 | CENJ          | -202 | ARID1A        | 3689 | TNFSF8        | 12735 |
| MAR1         | -9072 | NHLRC2      | -6083 | FAM161A       | -3127 | ERCC62        | -201 | MMR6732 ///   | 3690 | ORF02         | 12742 |
| ATG101       | -9071 | MCAM /// MI | -6081 | PACR1         | -3126 | LSMS          | -200 | PIEZO1        | 3691 | SKK1          | 12743 |
| ZFAND1       | -9070 | SUV39H2     | -6080 | TAF4          | -3125 | ENPEL1        | -199 | SLC25A34      | 3692 | ERBB2         | 12747 |
| CDCA7        | -9069 | NONO        | -6079 | SMCHD1        | -3124 | FADS1 /// Mif | -198 | TTC6          | 3694 | MASP1         | 12752 |
| ZNF462       | -9068 | MMAB        | -6078 | NFKL1         | -3123 | CERS6         | -197 | OFCC1         | 3695 | DCN           | 12753 |
| RPL24        | -9067 | ANKRD39     | -6076 | SDRA2E1       | -3122 | MIR83         | -196 | G8A3          | 3696 | SERPIN9       | 12759 |
| ISYNA1       | -9066 | ISCA1       | -6075 | RBBP6         | -3121 | STRBP         | -195 | OSMR          | 3697 | SEL1L         | 12774 |
| CLB1         | -9065 | MED10       | -6074 | TMEM223       | -3120 | ALMS1         | -194 | TMCSB         | 3698 | MIR6P         | 12775 |
| DHODH        | -9064 | DHPS        | -6073 | RP11-672L10   | -3119 | CK2S          | -193 | LOC10192755   | 3699 | INT59         | 12788 |
| CEP70        | -9063 | POU2F1      | -6072 | EBP           | -3118 | MEGF8         | -192 | LINC00973     | 3701 | PPPAR1L       | 12789 |
| GOLGA7       | -9062 | RPS19BP1    | -6071 | ESF1          | -3117 | TIGD1         | -191 | MS4A6A        | 3702 | CACNB1        | 12790 |
| MGM1E1       | -9061 | HSD17B10    | -6070 | ZBTB9         | -3115 | MESP1         | -190 | CN3J          | 3703 | STRN          | 12791 |
| CNCG2        | -9060 | MFS09       | -6069 | BAD           | -3114 | SBR1          | -189 | ZDHHC8        | 3704 | C18orf8       | 12795 |
| RHICL2       | -9059 | ATXN1       | -6068 | NUPR8         | -3113 | MIF22         | -188 | SRRT          | 3707 | CENPN         | 12796 |
| RBM17        | -9058 | C11orf49    | -6067 | SROG1         | -3112 | CL11orf30     | -187 | ENP1          | 3709 | YWHAE7        | 12807 |
| ZZZ3         | -9057 | AKIP1       | -6066 | DNAJC18       | -3111 | FEN1          | -186 | LGALS8        | 3710 | SERP2         | 12808 |
| CADP5        | -9056 | FAM174B     | -6065 | TTC19         | -3110 | TMEM161B      | -185 | EPHAE6        | 3711 | ITGB6 /// LOC | 12812 |
| LOC10013235  | -9055 | RABGGT8 /// | -6064 | TBCA          | -3109 | YPEL1         | -184 | SAMM50        | 3712 | CTS8          | 12813 |
| PCBP1-AS1    | -9054 | DIRC2       | -6062 | FUT4          | -3108 | WHSC1         | -183 | AA55          | 3713 | ZBTB78        | 12819 |
| SMAD1        | -9053 | USP48       | -6061 | RPARP-AS1     | -3107 | NCAF2         | -182 | FOS           | 3714 | 3777          | 12821 |
| CU4B         | -9052 | RFXANK      | -6060 | NUP188        | -3106 | DCITM4        | -181 | MYH11         | 3715 | LOC283788     | 12822 |
| ALG13        | -9051 | UBA6        | -6059 | YSP           | -3105 | THYN1         | -180 | HTR1F         | 3717 | OR51E2        | 12826 |
| SBF1         | -9050 | APBB2       | -6058 | COK6A1        | -3104 | TBC1D31       | -179 | CCBE1         | 3719 | FCAR          | 12829 |
| TP53INP2     | -9049 | ADD2        | -6057 | ANAPC10       | -3103 | DUT           | -178 | GGTA1P        | 3720 | MS4A6A        | 12835 |
| CACNA1A ///  | -9048 | ILK1L-AS1   | -6056 | RBM8A         | -3102 | ZNF639        | -177 | FAM107A       | 3721 | WP2           | 12840 |
| MLX          | -9047 | YHDF3       | -6055 | TRIM45        | -3101 | HBS1L         | -176 | ILRL1         | 3722 | SNTB2         | 12843 |
| RAD50        | -9046 | TDRK1       | -6054 | ZNF364A       | -3100 | SEST1         | -175 | MYO7B         | 3723 | PAPPA         | 12845 |
| ZBED1        | -9045 | PSMG2       | -6053 | RAD18         | -3099 | SKA2          | -174 | ANKRD28       | 3725 | CD44          | 12848 |
| IL17RB       | -9044 | UBQLN2      | -6052 | SYNCRIP       | -3098 | JPH1          | -173 | MUC5B         | 3726 | CDH24         | 12857 |
| PSME4        | -9043 | EM1L        | -6051 | GRIN2D        | -3097 | ASRGL1        | -172 | LINC00692     | 3727 | FAM65A        | 12861 |
| DENND2A      | -9042 | GLD04       | -6050 | ASF1A         | -3096 | CENB1         | -171 | RIN3          | 3728 | CPM           | 12867 |
| TM67 /// TM  | -9041 | SLC16A1     | -6049 | ZNF473        | -3095 | MCM2          | -170 | MBNL1         | 3730 | FRMD4B        | 12895 |
| UBESC        | -9040 | NR04        | -6048 | NR04          | -3094 | PTL1          | -169 | ANG           | 3731 | NPC1          | 12903 |
| STRN         | -9038 | MTURN       | -6046 | DACH1         | -3093 | HGFRRP3       | -168 | CCT4          | 3733 | NKX1          | 12912 |
| RAB14        | -9037 | PWAR6       | -6045 | PIK2B /// SE  | -3092 | CISD2         | -167 | CYP2B6        | 3734 | LVRM2         | 12917 |
| NDUFA10      | -9036 | PIGO        | -6044 | SLC25A17      | -3091 | RADS1AP1      | -166 | ERVH-3        | 3736 | KYNU          | 12918 |
| HAUSA /// MI | -9035 | C1GALT1     | -6042 | ZNF227        | -3090 | BRCA1         | -165 | KLF6          | 3737 | TBC1D30       | 12925 |
| KIAA0319L    | -9034 | HRAS        | -6041 | BCL2L2-PABP1  | -3089 | ZNF227        | -164 | SYDE1         | 3738 | SAMDBL        | 12928 |
| CTD-2287016  | -9033 | LOC-2286161 | -6040 | SRGAP1        | -3088 | UBE2C         | -163 | C18orf15      | 3739 | PAE1          | 12929 |
| GET4         | -9032 | SKP1        | -6039 | EIF5B         | -3087 | RFC5          | -162 | GRIN1         | 3740 | MAPA          | 12933 |
| OGFOD3       | -9031 | HSF2        | -6038 | GALNT12       | -3086 | FRG1 /// LOC1 | -161 | C7orf34       | 3741 | ARL10         | 12937 |
| CMIP         | -9030 | RBM41       | -6037 | AAGAB         | -3085 | NGRN          | -160 | MIR612 /// N  | 3742 | AX47261       | 12940 |
| SMIM12       | -9029 | GNAO1       | -6036 | SYT4          | -3084 | CDC7          | -159 | CTD-2547L24   | 3744 | UTP11L        | 12942 |
| CHEK2        | -9028 | BAGALTS     | -6035 | DNTTIP1       | -3083 | PIGW          | -158 | SMIM2         | 3745 | CAS21         | 12948 |
| ZNF440       | -9027 | ANKRD49     | -6033 | ANKRD49       | -3082 | ANKRD49       | -157 | CYP2C12       | 3747 | M5NB          | 12950 |
| SPAIN        | -9026 | SSBP3       | -6031 | PIGK          | -3081 | PIGK          | -156 | RPL-27E28.1   | 3748 | TAC1          | 12953 |
| LSM14B       | -9025 | ARIH2       | -6031 | ABCF1         | -3080 | C18orf61      | -155 | PRSS36        | 3749 | CFTR          | 12954 |
| ELAVL4       | -9024 | ALDOA       | -6030 | MIR636 /// SI | -3079 | MIR636        | -154 | LINC00165     | 3750 | U2AF2         | 12958 |
| C18orf42     | -9023 | RPP         | -6029 | MOAP1         | -3078 | CRMP1         | -153 | PPM1M         | 3752 | SMIM21        | 12960 |
| TMEM242      | -9022 | ABHD16A     | -6028 | RECOL         | -3077 | CENPH         | -152 | STX           | 3754 | LRR37A7P ///  | 12961 |
| ZNF75        | -9021 | C11orf1     | -6027 | PCD11         | -3076 | HGFRRP3       | -151 | FBP1          | 3755 | OR5L1         | 12964 |
| RAD23A       | -9020 | MTAF9       | -6027 | COM7          | -3075 | ILF3-AS1      | -150 | RP11-96K19.4  | 3756 | PDE5A         | 12965 |
| PRRC2A       | -9019 | KIF1A       | -6025 | STK16         | -3074 | ZNF747        | -149 | GLYT12        | 3757 | PTAFR         | 12969 |
| POLR2E       | -9018 | DHX30       | -6024 | RNF34         | -3073 | MTFHD2L       | -148 | CNTROB        | 3758 | DCT           | 12972 |
| SLC15A4      | -9017 | ZNF777      | -6023 | HIC2          | -3072 | TCTEX1D2      | -147 | PDS5B         | 3759 | HDAC4         | 12975 |
| SKD1         | -9016 | C17orf85    | -6022 | PQBP1         | -3071 | CHAF1B        | -146 | AKO21537      | 3760 | RECK          | 12987 |
| SLC6GALNAC4  | -9015 | RHBD02      | -6021 | PPP2R3C       | -3070 | C2orf68       | -145 | PKCK1E2-AS3   | 3762 | PDE5A         | 12993 |
| C15orf40     | -9014 | MTAF9       | -6020 | MTAF9         | -3069 | WDR76         | -144 | WDR76         | 3763 | ACAT1         | 13003 |
| TMEM67       | -9012 | URB1        | -6019 | PRKRIR        | -3068 | PAFAH1B3      | -143 | ACSBG2        | 3764 | GGA2          | 13008 |
| RNF220       | -9011 | C12orf75    | -6018 | TRUB2         | -3067 | CDK5R1        | -142 | C1QTNF1-AS1   | 3765 | TMEM229B      | 13014 |
| MIF4GD       | -9010 | TADK1       | -6016 | OSER1-AS1     | -3066 | SPAG16        | -141 | GIPR          | 3766 | ZNF214        | 13015 |
| YIPF5        | -9009 | SUV420H1    | -6015 | COL9A2        | -3065 | ZNF260        | -140 | GYP4          | 3770 | KMT2C         | 13021 |
| MTHFD2L      | -9008 | VMAA21      | -6014 | TAF7          | -3064 | FRBP3         | -139 | CDS9          | 3771 | CDS2          | 13026 |
| ZMYM5        | -9007 | WDR44       | -6013 | PCDH11 /// P  | -3063 | FURP1         | -138 | LOC10218995   | 3772 | RHB8          | 13026 |
| TMTC2        | -9006 | LOC10192800 | -6012 | GTFF4A        | -3061 | GABRB3        | -137 | LOC1228       | 3773 | MOGAT2        | 13052 |
| LOC10192858  | -9005 | APIP        | -6011 | EIFLAX        | -3060 | FAM221A       | -136 | C1orf228      | 3774 | FRAS1         | 13061 |
| FRS2         | -9004 | RRM2        | -6010 | SMG8          | -3059 | CEP192        | -135 | NPAS3         | 3775 | BICD1         | 13062 |
| ZNHIT1       | -9003 | TUFM        | -6009 | C12orf49      | -3058 | ECT2          | -134 | ORS12         | 3777 | COPS7B        | 13064 |
| CRH1A        | -9002 | CNTRL       | -6008 | DNAAF2        | -3057 | FTSD          | -133 | PKP1          | 3780 | SREBF2        | 13065 |
| TBL1XR1      | -9001 | OCT1        | -6007 | BAGIN1        | -3056 | PTPRAD1       | -132 | CACNA1E       | 3783 | CELSF2        | 13067 |
| E1F3M        | -9000 | MR04        | -6006 | HYPK /// MIR  | -3055 | NAF1          | -131 | ENG           | 3785 | RABGAP1L      | 13072 |
| Csorf51      | -8999 | EPT1        | -6005 | FIGLN1        | -3054 | WDR76         | -130 | B4GALT6       | 3786 | LOC283693     | 13078 |
| GART         | -8998 | CDK12       | -6004 | HS6ST2        | -3053 | SSRP1         | -129 | ADAP1         | 3787 | FRMD8         | 13083 |
| KDM8         | -8997 | ZBTB6       | -6003 | SAP130        | -3052 | HNRNPA3       | -128 | SCNN1A        | 3788 | SPATA32       | 13099 |
| OTUD7A       | -8996 | UBE2G2      | -6002 | COCS          | -3051 | NAA40         | -127 | LINC00654 /// | 3789 | MTOR          | 13105 |
| PS3RK        | -8995 | EDN3        | -6001 | SAP94         | -3050 | EDN3          | -126 | CTH           | 3790 | ZNF396        | 13109 |
| HELQ         | -8994 | TMTP3BP2    | -6000 | RABL3         | -3049 | CTD-1201.17   | -125 | METAP1D       | 3791 | TMEM62        | 13114 |
| CAPRIN1      | -8993 | SCSD        | -5999 | ATPSG3        | -3048 | PLA2G12A      | -124 | KLC3          | 3794 | PKO2          | 13125 |
| HECTD2       | -8992 | HUNK        | -5998 | ZNF586        | -3047 | RNA5EH2A      | -123 | KIR3DL1       | 3795 | IL1R1         | 13128 |
| DYDC2        | -8991 | TRIM11      | -5997 | UBTF          | -3046 | DHFR          | -122 | ANKRD20A1     | 3796 | LOC10192881   | 13132 |
| ZNF837       | -8990 | WWC1        | -5996 | SON           | -3045 | ALMS1         | -121 | LILRA2        | 3797 | RP11-700H6.1  | 13139 |
| BPTF         | -8988 | THDC5       | -5995 | EIFLAX        | -3044 | ZNF776        | -120 | BRE-AS1       | 3799 | 38231         | 13142 |
| PHKB         | -8987 | IQGAP3      | -5994 | TKO5          | -3043 | PDCD2L        | -119 | ABC49         | 3800 | Csorf84       | 13143 |
| BIVM         | -8986 | SUPV3L1     | -5993 | RBM48         | -3042 | ZNF329        | -118 | EPB41L2       | 3801 | NIPAL2        | 13151 |
| RB1CC1       | -8985 | KIAA1549    | -5992 | ZNF670        | -3041 | CHEK1         | -117 | ARPC5         | 3802 | LARP7         | 13153 |
| ARMC10       | -8984 | SH          |       |               |       |               |      |               |      |               |       |

|               |       |               |       |              |       |               |      |               |      |               |       |
|---------------|-------|---------------|-------|--------------|-------|---------------|------|---------------|------|---------------|-------|
| TAOK2         | -8951 | H3F3A /// H31 | -5958 | STAMPB       | -3006 | SKA2          | -83  | FLJ16124 ///  | 3848 | ELL2          | 13313 |
| ZNF763        | -8949 | C3orf70       | -5957 | PEBP1        | -3005 | SSX2IP        | -82  | PDX1          | 3849 | FOXP1         | 13314 |
| TMEM258       | -8948 | GOLT1B        | -5956 | POU4F3       | -3004 | DPY5L5        | -81  | C2orf83       | 3850 | RDH13         | 13315 |
| CLC2          | -8947 | YPO2          | -5955 | TE1          | -3003 | CAPRN1        | 80   | ANGPTL3       | 3851 | HIC2          | 13332 |
| CCHCR1        | -8946 | MED23         | -5954 | RAD23A       | -3002 | CAND1         | -79  | DLCL1         | 3853 | KCTD5         | 13338 |
| POCIA         | -8944 | UZAF2         | -5953 | TRIM27       | -3001 | NCAPD3        | -78  | SVT11         | 3854 | TLI2          | 13352 |
| MCM3AP-AS1    | -8943 | TMEM80        | -5952 | MUT          | -3000 | THAP5         | -77  | LOC10192907   | 3855 | DNAJA4        | 13354 |
| BIRC6         | -8942 | RP11-884K10   | -5951 | IDH3B        | -2999 | LCMT2         | -76  | CEACAM1       | 3856 | PGC           | 13355 |
| LIAS          | -8941 | DHFR1L        | -5950 | BTF          | -2998 | NAA15         | -75  | TRAV20 /// T1 | 3857 | ZFYVE9        | 13358 |
| ATM7L3B       | -8940 | MYO2          | -5949 | ORC1         | -2997 | ORC1          | -74  | OKS2          | 3858 | TC12          | 13375 |
| CEP97         | -8938 | FLTA          | -5948 | SENP3        | -2996 | RMN4          | -73  | JAK3          | 3859 | PTGER3        | 13378 |
| AHCYL1        | -8937 | RP11-700J17   | -5947 | MTA2         | -2995 | RNF41         | -72  | LOC10050752   | 3861 | SFRP1         | 13383 |
| CAMK2N1       | -8936 | MAST1         | -5946 | C9orf72      | -2994 | FEN1          | -71  | SGK2          | 3862 | MAST4         | 13388 |
| ZNF684        | -8935 | PLEKHA5       | -5945 | KLHL8        | -2993 | IRAK1BP1      | -70  | TCF3          | 3863 | STK35         | 13392 |
| RFK3          | -8934 | THOCS         | -5944 | NUP62CL      | -2992 | PPM1E         | -69  | RP11-435O5    | 3864 | CDB6          | 13399 |
| HGF           | -8932 | KIF3B         | -5943 | FANCB        | -2992 | FANCB         | -68  | BNM51P6       | 3866 | RALGAP1       | 13407 |
| TDR2          | -8931 | RBF20C        | -5942 | GATS         | -2990 | MOCL1         | -67  | IQSEC3        | 3868 | FLT10         | 13410 |
| RPS21         | -8930 | THAP9         | -5941 | GTF3CG       | -2989 | SUMO1         | -66  | KIF26B        | 3870 | JPH3          | 13412 |
| CAPRN1        | -8929 | UBQLN1        | -5940 | ALG9         | -2988 | ARNT2         | -65  | MVLP1         | 3871 | NDRG2         | 13420 |
| METTL9        | -8928 | CENPB         | -5939 | SCAMP5       | -2987 | PKIA          | -64  | PPBP2         | 3872 | UGT1A1 /// U  | 13421 |
| AGFG1         | -8927 | CDC23         | -5938 | APTR         | -2986 | OSGEP11       | -63  | TNFRSF11B     | 3873 | SPAG8         | 13435 |
| LOC10192959   | -8926 | GABRB3        | -5937 | RNF20        | -2985 | COCH          | -61  | DI02          | 3875 | LOC10192933   | 13440 |
| NDU9A         | -8925 | ZMYND8        | -5936 | PSD3         | -2984 | ZNF567        | -62  | BNK2          | 3876 | TADA3         | 13441 |
| RBMA          | -8924 | HAUS5         | -5935 | CBX3         | -2983 | CKAP5         | -60  | EPS15L1       | 3877 | KLFE          | 13445 |
| MACROD2       | -8923 | TMPO          | -5934 | WHSC1        | -2982 | C2orf69       | -59  | BCL2L14       | 3878 | SPTBN1        | 13446 |
| SYNM          | -8922 | PSMC2         | -5933 | BRAP         | -2981 | DNAJC6        | -58  | S100G         | 3879 | KSR1          | 13452 |
| LOC10050731   | -8921 | ALKBH2        | -5931 | DARS         | -2980 | DBF4          | -57  | FGF10-AS1     | 3880 | LINC00643     | 13460 |
| SMDF1         | -8920 | ZMAT2         | -5929 | KLHC10       | -2979 | SRSF12        | -56  | DCN           | 3881 | RMS2          | 13464 |
| CSPT1         | -8918 | ZNF746        | -5928 | NUDT3        | -2978 | ARL3          | -55  | KANK3         | 3882 | MEF2A         | 13474 |
| KIF38         | -8917 | ACTR10        | -5927 | LINC00997    | -2977 | CAMSAP1       | -54  | USHBP1        | 3883 | DCN           | 13481 |
| KAA2018       | -8916 | KLF13         | -5926 | RP4-635E18   | -2976 | TIPIN         | -53  | DUSP1         | 3884 | XPR1          | 13494 |
| ADAM22        | -8915 | CLIP2         | -5925 | TUBA3BP      | -2975 | PRIM1         | -52  | RP11-402D21   | 3885 | ST7-AS2       | 13516 |
| LOC646778     | -8914 | CSTF3         | -5924 | ZNF496       | -2974 | RP5-93SK16.1  | -51  | C1orf54       | 3886 | ATP6VD02      | 13521 |
| FLJ27354      | -8913 | NUP210        | -5923 | GRSF1        | -2973 | COCH          | -50  | SERPIN81      | 3887 | TNSL          | 13526 |
| AUNIP         | -8912 | PUM1          | -5922 | HSP9AA       | -2972 | ARPP19        | -49  | ZNF280A       | 3888 | C17orf89      | 13527 |
| MAP9K         | -8911 | CNPY1         | -5921 | PKN2         | -2971 | CAMSAP1       | -48  | CYP2C9        | 3889 | LMIG2         | 13536 |
| REV1          | -8910 | NDC1          | -5920 | TRMT6        | -2970 | ZNF829        | -47  | SLC25A28      | 3891 | DNAJC16       | 13538 |
| PDE9A         | -8908 | SUN1          | -5919 | DNMT3A       | -2969 | SERF1A /// SE | -46  | AGTR2         | 3892 | ELK4          | 13539 |
| ZC3H7A        | -8907 | CNST          | -5918 | TFRC         | -2968 | LOC10192933   | -45  | PRR26         | 3893 | ADRB3         | 13544 |
| ZRANB1        | -8906 | RDX           | -5917 | SSU72        | -2967 | RNF5 /// RNF4 | -45  | ZSCAN20       | 3894 | TC2CD2        | 13548 |
| TMEM57        | -8905 | YXCC4         | -5916 | RFD3         | -2966 | RFD3          | -43  | ZNF676        | 3895 | SOX6          | 13551 |
| RNF208        | -8904 | RBP4          | -5914 | TMEM148 ///  | -2965 | ORC4          | -42  | KLK4          | 3896 | TMEM45B       | 13554 |
| RTN4RL1       | -8903 | ZNF23         | -5913 | C6orf203     | -2963 | CEP97         | -41  | ZFC3H1        | 3897 | MEG3          | 13555 |
| PP1L6         | -8900 | TMCC2         | -5912 | FDX1         | -2962 | METTL21A      | -40  | SLC6A4        | 3899 | METTL9        | 13565 |
| BHLHE22       | -8899 | SPTBN2        | -5911 | LMBR1        | -2961 | CSRP2BP /// P | -39  | WN7B          | 3901 | PTBP3         | 13566 |
| ZFYVE26       | -8898 | KLF13         | -5910 | PGAP1        | -2960 | NPAT          | -38  | PLEKH71       | 3902 | PRPF31        | 13573 |
| RABL5         | -8897 | C1orf80       | -5908 | RBPJ         | -2959 | SPAST         | -37  | HFE           | 3904 | NHSL1         | 13589 |
| OSER1         | -8896 | XRCC          | -5907 | PEX26        | -2958 | CENPV         | -36  | SSX2 /// SSX2 | 3905 | CD44          | 13596 |
| C1orf233      | -8895 | DOT /// DDTL  | -5906 | ANAPC7       | -2957 | KLUH23 /// PH | -35  | CNIH4         | 3906 | HNRNPM        | 13599 |
| NEK2          | -8894 | ACAA2         | -5905 | HNRNPM       | -2955 | C2CD3         | -34  | ATE1          | 3908 | DERL3         | 13612 |
| USP22         | -8893 | TMEM53        | -5904 | PTPRS        | -2954 | CENB1         | -33  | TNFAIP8L2     | 3909 | PRI14L        | 13614 |
| MPC2          | -8892 | KPNA4         | -5903 | RIMS3        | -2953 | KIF2A         | -32  | FAM171A2      | 3910 | UNKL          | 13625 |
| ALVR18        | -8891 | KDEL1         | -5902 | ADSL         | -2952 | MAD2L1        | -31  | MKNK2         | 3911 | ATP11A-AS1    | 13626 |
| ATC3DA        | -8890 | ERCC1         | -5901 | FCM1         | -2951 | PTCL17        | -30  | FCN2          | 3912 | ZFZ1          | 13627 |
| TRF2          | -8889 | ATP2C1        | -5900 | EED          | -2950 | SMC2          | -29  | BCD42811 ///  | 3913 | MME           | 13632 |
| ZBTB10        | -8888 | ECHDC1        | -5899 | EPICAM       | -2949 | KIAA1324L     | -28  | INPP4B        | 3917 | METTL10       | 13635 |
| CNTNAP5       | -8887 | ZNF253        | -5898 | GAR1         | -2948 | CBX3          | -27  | ADARB1        | 3919 | SMAD3         | 13638 |
| OCLR          | -8886 | UBAC1         | -5897 | HAUS6        | -2947 | SIMC1         | -26  | LECT2         | 3920 | IQCE          | 13645 |
| TMEM40L       | -8885 | DR1           | -5896 | ITGAE        | -2946 | ZNF542P       | -25  | ERIC3-AS1     | 3921 | LMF1          | 13646 |
| NOPEY2        | -8884 | RAB48         | -5895 | RAMB8        | -2945 | ELAVL1        | -24  | HPF4          | 3922 | TMEM151B      | 13655 |
| COX11         | -8883 | CIAPIN1       | -5894 | LOC10272444  | -2944 | RFAVR2        | -23  | TFP4A         | 3923 | LRRFIP1       | 13662 |
| INO80D        | -8882 | WDR61         | -5893 | HELO         | -2943 | AFG3L2        | -22  | AX747132 ///  | 3925 | MKL2          | 13669 |
| PSMD11        | -8881 | ERCC3         | -5892 | GEMIN2       | -2942 | YPEL1         | -21  | LOC10106042   | 3926 | USP33         | 13672 |
| SLC22A5       | -8880 | FOXRED2       | -5891 | ACSL6        | -2941 | B3GNT1        | -20  | POU5F2        | 3927 | HGF           | 13676 |
| ZNRD1         | -8879 | KPNB1         | -5890 | SLC38A1      | -2940 | C2orf44       | -19  | CST3          | 3928 | PRF38         | 13681 |
| RAB2B         | -8878 | TRAF1         | -5889 | TCERG1       | -2939 | SUMO1         | -18  | COL27A1       | 3929 | TRP2          | 13683 |
| RP40          | -8876 | YF1B          | -5888 | ZNF585A      | -2938 | COCH          | -17  | SOD3          | 3930 | SEMA6D        | 13684 |
| PNPLA8        | -8875 | JRK1          | -5887 | GTF2H2 /// G | -2937 | TTF1          | -16  | OFCC1         | 3931 | FBXL20        | 13685 |
| DCTN2         | -8874 | MRLP9         | -5886 | DNAJC21      | -2936 | ZNF606        | -15  | MOGAT1        | 3934 | TRIO          | 13694 |
| BABAM1        | -8873 | NME4          | -5885 | FAM222A      | -2935 | LSMS          | -14  | TM4SF1        | 3936 | MCL1          | 13698 |
| ZNF564        | -8872 | LOC642852     | -5884 | WAC          | -2934 | TOPBP1        | -13  | MMP14         | 3937 | C6orf36       | 13701 |
| MIR313D       | -8871 | SUN1          | -5883 | TNRC18       | -2933 | TNRC18        | -12  | HSP90A        | 3938 | RUNX2         | 13705 |
| CKNAB3        | -8870 | NUDT16L1      | -5882 | UR1          | -2932 | RSF1          | -11  | ACKR4         | 3939 | LAMB4         | 13711 |
| AGBL5         | -8869 | SUMO3         | -5881 | RP3-428L16.2 | -2931 | SCG3          | -10  | IL1B          | 3941 | RHOQ          | 13721 |
| GA2           | -8868 | LYSMD1        | -5879 | WHSC1        | -2930 | TMOD2         | -9   | SMG7-AS1      | 3942 | ZBTB20        | 13722 |
| CALML4        | -8866 | DGCR14 /// T5 | -5878 | ZZZ3         | -2929 | ZBTB26        | -8   | LOC10192718   | 3945 | APOH          | 13733 |
| BODML1        | -8865 | MDM2          | -5876 | CREB3L4      | -2928 | EPC2          | -7   | EGFR          | 3946 | SAGRF1        | 13737 |
| RP7           | -8864 | RNF5          | -5875 | SRSF12       | -2927 | DPY19L2P2     | -6   | NCR1          | 3947 | RNRD2         | 13739 |
| RP252 /// C15 | -8863 | LOC286367     | -5874 | SMO5         | -2926 | CENPV         | -5   | KLFP          | 3948 | GUCYA1        | 13742 |
| ANKRD11       | -8862 | DXK6          | -5873 | ZNF239       | -2925 | MSANTD3-TM    | -4   | SNX33         | 3949 | C19orf66      | 13747 |
| PKMYT1        | -8861 | XRCC6BP1      | -5872 | RALGAP1A /// | -2924 | ZFP62         | -3   | BOD1L2        | 3950 | C5orf56       | 13749 |
| CMT-2555O16   | -8860 | THUMPD3       | -5871 | ACP1         | -2923 | RM1L          | -2   | LOC10050964   | 3951 | PTBP1         | 13758 |
| BRWD1         | -8859 | DFFA          | -5870 | FAM73A       | -2922 | NTS1C8-RDH1   | -1   | C1orf56       | 3952 | TACC1         | 13765 |
| UFPS3A        | -8858 | KOYL1A2       | -5869 | ITGB9B       | -2921 | MAP38X        | 2    | ME024         | 3953 | RAI1          | 13772 |
| LOC645903     | -8857 | GZL1          | -5868 | BKCN1        | -2920 | GZL1          | 3    | LOC10042275   | 3955 | UDUSF7        | 13773 |
| NDFIP2        | -8856 | RBM14-RBM4    | -5867 | ZNF805       | -2919 | ND01          | 4    | FAM198B       | 3956 | POLG          | 13775 |
| CSRN3P        | -8855 | SAB8          | -5866 | SMIM8        | -2918 | OAF           | 5    | SLC6A7        | 3957 | TMEM106A      | 13776 |
| LSAMP         | -8854 | RAC1          | -5865 | GPR180       | -2917 | TRADD         | 9    | CLDN1         | 3958 | SDCBP2-AS1    | 13781 |
| CSGALNACT1    | -8853 | DNAJA2        | -5864 | SIVA1        | -2916 | MCTP1         | 12   | NLGN2         | 3959 | DCAF5         | 13788 |
| LOC90784 ///  | -8852 | SPOP          | -5863 | CUEDC2       | -2915 | LOC388692     | 13   | ORD2          | 3960 | PROSC         | 13795 |
| UFPS3B        | -8851 | SBD5 /// SBD5 | -5862 | EDIL1        | -2914 | EDIL1         | 16   | LILRA4        | 3961 | ITC2B-AS1     | 13802 |
| CELF5         | -8850 | COP58         | -5861 | NOM1         | -2913 | F7            | 18   | YSSK6         | 3962 | FAM71B        | 13803 |
| MCMBP         | -8849 | ARID4A        | -5860 | FAM27E2 ///  | -2912 | TP63          | 19   | ERIC1-AS1     | 3963 | RQCD1         | 13805 |
| RNF170        | -8848 | ZWILCH        | -5859 | ZNF431       | -2911 | EMP1          | 20   | KDM7A         | 3964 | B4GALT1       | 13806 |
| C2orf76       | -8847 | 39873         | -5858 | APBA2        | -2909 | DNAH12        | 23   | CT55          | 3967 | L3MBTL2       | 13827 |
| SERTAD4       | -8846 | RNF165        | -5857 | TAF2         | -2908 | CCL20         | 25   | HFE           | 3968 | NFKB2         | 13831 |
| AKIRIN1       | -8845 | POU5F1        | -5856 | CENPD1P1     | -2907 | MVZAP         | 27   | CYPA411 /// C | 3969 | PCGEM1        | 13833 |
| LOC10192985   | -8844 | ORCS          | -5855 | ANAPC13      | -2906 | CPXM2         | 28   | KLK14         | 3970 | HMGGA2        | 13835 |
| FLC1          | -8843 | C10orf82      | -5854 | YBK1         | -2905 | ADAMTS9-AS1   | 33   | PPP4R1L       | 3971 | FOXP2         | 13837 |
| INSIG2        | -8841 | TM6SF1        | -5853 | IRGQ         | -2904 | PEL1          | 36   | PLEKHN1       | 3972 | TMEM170A      | 13844 |
| ACAD9         | -8840 | KIAA1430      | -5852 | HN1L         | -2903 | FLJ6848       | 37   | KCNJ15        | 3974 | MSX2          | 13849 |
| IL17D         | -8839 | MLLTA-AS1     | -5851 | KPNB1        | -2902 | LINC00312     | 38   | VNDR10P       | 3975 | TNFRD2        | 13851 |
| LRRCL1        | -8838 | ATP11         | -5850 | RNF41        | -2901 | RNF41         | 39   | ANKRD30BL /// | 3976 | ARHGAP24      | 13856 |
| NUDT5         | -8837 | ZNF536        | -5849 | TOPORS       | -2900 | TYMP          | 3977 | TYMP          | 3977 | DLCL1         | 13860 |
| POLB          | -8836 | RP11-839N5    | -5848 | PPP2R1A      | -2899 | MIRS193 /// L | 42   | LOC10192781   | 3978 | CD59          | 13871 |
| FAM134B       | -8835 | CTC-428G20.3  | -5847 | ARHGFB3      | -2898 | ZNF365        | 43   | UBQLN3        | 3980 | ARHGFE12      | 13878 |
| LOC10192871   | -8834 | ARHGDI6       | -5846 | DNAJC24      | -2897 | TLRS          | 44   | CDB6          | 3982 | C5orf51       | 13879 |
| PALM2         | -8832 | BEZG          | -5845 | GOPC         | -2896 | PRGCSA        | 48   | KLK7          | 3983 | DGCR14 /// T5 | 13882 |
| HDBP8         | -8831 | GNL2          | -5844 | COX7A2       | -2895 | RP11-138A9.1  | 49   | IFNGR1        | 3984 | CDB4          | 13884 |
| ESD           | -8830 | SKP1          | -5843 | MSL1         | -2894 | WDR59         | 50   | TMPS56        | 3986 | MCL1          | 13886 |
| RPL38         | -8829 | FASTKD2       | -5842 | EFS          | -2893 | MYOF          | 53   | PRSS3P3       | 3987 | FABP4         | 13888 |
| SLC39A7       | -8828 | ZNF626        | -5840 | ZNF77        | -2892 | LOC10192861   | 54   | ENTH2D        | 3988 | SLC24A1       | 13895 |
| SYNRG         | -8827 | UBE2R2        | -5839 | YROC         | -2891 | MVLY          | 57   | RASA3         | 3989 | RBMS3         | 13899 |
| RP            |       |               |       |              |       |               |      |               |      |               |       |

|                     |                       |                    |                     |                   |                     |
|---------------------|-----------------------|--------------------|---------------------|-------------------|---------------------|
| KDMSB -8792         | LPHN3 -5805           | NAA25 -2857        | ACTR3BP2 /// 101    | PERM1 4031        | ZC3H15 14026        |
| ASPM -8790          | CDCX7 -5804           | SLC3D9 -2856       | CA1 104             | ZNF552 4032       | TJP2 14027          |
| ZNF626 -8789        | USP27X -5803          | VLPM1 -2855        | SERPIN86 106        | C18orf12 4033     | CHP1 14029          |
| FTBD10 -8788        | MRRP16 -5802          | KIF21 -2854        | KIF21 107           | BEST1 4034        | BIGALTS 14030       |
| STEGGALNAC4 -8787   | CDC82 -5801           | DOPEY1 -2853       | LOC10065277 108     | TMCO4 4037        | RHOBT83 14034       |
| NFATC2IP -8785      | SKP1 -5800            | RBM14 -2852        | ARF1 109            | SPAG11A /// 4038  | ARL10 14036         |
| RSFH108 /// I -8784 | MNAT1 -5799           | PDCL -2850         | P2RX1 110           | GPHA2 4040        | CYP3A7 /// CY 14040 |
| APOOL -8783         | LOC10050654 -5798     | VRK3 -2849         | RIPK3 111           | AX747444 4041     | ZBTB20 14042        |
| FBXO22 -8782        | MLH1 -5797            | KIF2C -2848        | PMCHL2 112          | ITPB8 4042        | ARSD 14043          |
| ARHGAP18 -8781      | JADE1 -5795           | NCL1 -2847         | LOC1003012 113      | IL1F10 4043       | PRDM15 14045        |
| ZNF529 -8780        | XU -5794              | MMP4K4 -2846       | NEU1 115            | SLC12A9 4044      | DPH16 14048         |
| UBALD2 -8779        | ZBTB10 -5793          | KCMF1 -2845        | MP2L2 116           | CG3CL1 4048       | FRAS1 14050         |
| DYNL2 -8778         | PGS1 -5792            | KPNA1 -2844        | PLCD1 117           | SH3YL1 4049       | ADH4 14053          |
| ATG12 -8777         | ROBO2 -5791           | CHST9 -2843        | LOC10289002 /// 118 | GPRG6A 4050       | PCNX 14054          |
| ZSCAN26 -8776       | FUT9 -5790            | BCL7A -2842        | ITPR2 120           | LOC10192946 4051  | NAA30 14058         |
| CEBPZ05 -8775       | NLS1 -5789            | NM1T -2841         | NM1T 121            | TBCL100C 4052     | LRRFP1 14059        |
| KHLH24 -8774        | SMO2 -5788            | ARMC8 -2840        | ZFP36 122           | FGA 4053          | BMP91A 14061        |
| NCS1 -8773          | TTIC3 /// TTIC3 -5787 | LOC1019270 -2839   | FOSB 123            | HHLA3 4054        | ODF3B 14067         |
| MRRP24 /// U -8772  | CACNG4 -5786          | RAO1 -2838         | HFE 124             | AHCYL2 4055       | CBX2 14080          |
| LOC10192760 -8771   | INOB08 /// IN -5785   | KHORB53 -2837      | LOC284454 /// 125   | FGA 4058          | SFTPC 14082         |
| DRP2 -8770          | ARID1A -5784          | PDHX -2836         | MMP27 126           | CD70 4059         | PPM1K 14097         |
| SUB1 -8769          | C1orf52 -5783         | KPNB1 -2835        | RP11-443871 127     | SLC12A4 4060      | NFASC 14102         |
| VWDE -8768          | EXOC5 -5782           | BCORCP -2834       | LINC01118 128       | FBXO28 4061       | LRRP2 14111         |
| ZNF493 -8767        | ASF1A -5781           | POM121 /// I -2833 | HFE 131             | FLJ11710 4062     | DKFZp451A21 14119   |
| SPATC11 -8765       | ZNF555 -5780          | VAPB -2832         | N4BP1 134           | DAPK1 4063        | EDL3 14121          |
| R5BN1L -8764        | CENPB -5779           | RRM2 -2830         | DES /// SUPT2 135   | IL7R 4065         | KLK3 14126          |
| STX5 -8763          | YELP3 -5778           | FLAD1 -2829        | TRADO 136           | LOC10192815 4066  | GPR82 14133         |
| RNF30 -8762         | LARC20 -5777          | TADA1 -2828        | ANKRD20ASP 137      | TRPV5 4067        | SOMA 14136          |
| ERL3 -8761          | CP58 -5776            | TM9P9-AS1 -2827    | NRA43 138           | ATP2C 4069        | OCAD1 14137         |
| SLC7A1 -8760        | SNHG7 /// SN -5775    | KIF5C -2826        | RP11-30506.3 139    | SYNP02 4070       | SAMD1 14139         |
| C12orf4 -8758       | PARN -5774            | ATA1 -2825         | LOC647323 140       | HMMR-AS1 4071     | ZDHC21 14143        |
| GTF2F1 -8757        | RADS1L3-RFL -5773     | TOP2B -2824        | CR1 144             | SP110 4072        | CD6 14144           |
| LNK2 -8756          | VRK3 -5772            | GGH -2823          | CNN1 145            | SNX29 4073        | AKAP10 14148        |
| TRAPPC1 -8755       | HPDL -5770            | ZNF664 -2822       | LOC10050754 146     | POM121LIP 4074    | ELMO2 14150         |
| PTMA -8754          | MRRP21 -5769          | GTP21 -2821        | ACACB 148           | NRA1 4076         | C12orf66 14156      |
| 39326 -8753         | SPAT5 -5768           | PHACTR4 -2820      | C1orf186 /// I 149  | KCNAB1 4077       | SLGEC1 14157        |
| CUL4B -8752         | HSPA2 -5767           | SLC27A2 -2819      | CXCL2 151           | EPHA3 4078        | CYP3A4 14160        |
| PCDH1A /// P -8751  | KMT2A -5766           | CACNA1B -2818      | PODN 152            | IRS4 4083         | CXCR6 14161         |
| TNX -8750           | BMDIN3D -5765         | RPE -2817          | DIAPH3-AS1 153      | KCND3 4084        | PCCB 14162          |
| DDC -8749           | VP53 -5764            | GGP51 -2816        | PTGS2 154           | SP3 4085          | USP32 /// USF 14167 |
| SCSD2 -8748         | PAF1 -5763            | ENKCA -2815        | ENKCA 158           | LINC00824 4086    | LRR9B 14176         |
| PPP1R8 -8747        | BCLAF1 -5762          | RFK -2814          | IHH 159             | KIF9 4087         | EH3 14177           |
| BAG4 -8746          | NRXN3 -5761           | GFPT1 -2813        | DBET /// DUX 160    | LOC10272485 4088  | MTSS1 14179         |
| SUN1 -8745          | MRLP36 -5760          | PIGL -2812         | FOSL2 161           | MUCL1 4089        | ANKUB1 14184        |
| PGD -8744           | EPI1 -5759            | PRDM10 -2811       | XG /// XGY2 163     | ERAP1 4091        | FAM83A 14185        |
| ERHC1 -8743         | TOR1C -5758           | FAM118B -2810      | NUDT17 164          | RP11-403P17 4092  | NELL1 14192         |
| CARHSP1 -8742       | NCRP1 -5757           | RANBP1 -2809       | CHRNA 165           | IKZF2 4093        | MRE11A 14197        |
| ATP13A1 -8741       | RBM23 -2808           | ZNF689 -2808       | ADHFE1 166          | LOC10050731 4094  | GREB1 14200         |
| ACSL6 -8740         | DUS4 -5755            | FAM204A -2807      | LINC01448 167       | SYNJ2 4098        | MCM8 14205          |
| ZNF677 -8739        | SRPK2 -5754           | SNX13 -2806        | ASAP3 170           | HEXDC 4099        | KDM8 14209          |
| C17orf97 -8738      | GREB1 -5753           | MKRN1 -2805        | SPRN 171            | LOC10192741 4100  | PAPPA 14213         |
| NONO -8737          | KIAA0232 -5752        | GOLGA1 -2804       | AC092192.1 172      | TUBGCP6 4102      | ZNF407 14232        |
| UBE2J -8736         | NDAUF2 -5751          | DKC1 /// MIR -2803 | FGF7 173            | BCA11 4104        | WNT7B 14235         |
| CPED1 -8735         | TBF -5750             | TRAF5 -2802        | WFKS59 174          | PPP2R3A 4105      | EXL4 14243          |
| GALNT13 -8734       | GEMIN2 -5749          | DKFZP43407 -2801   | FCRL4 176           | SMIM24 4106       | ATPEV0E1 14252      |
| EF3J -8733          | SLC35B4 -5748         | RAD23B -2800       | LOC10050549 177     | MIR124-2HG 4107   | HIP1 14255          |
| SFR1 -8732          | KFBP7 -5747           | CASP8AP2 -2799     | RP11-180N14 178     | HDAC11 4108       | CCDC134 14259       |
| BRD2 -8731          | RAP1GAP2 -5746        | NIPSNAP3A -2798    | SEMA4A 179          | FIFAB 4109        | C16orf13 14262      |
| GRM8 -8730          | NCL -5745             | HNRNP38 -2796      | LOC283855 180       | ORL2 4110         | LOC10050731 14269   |
| FHL1 -8729          | OCAD1 -5744           | KCPKAPK5-A 2795    | OCAT 4111           | CTC1 4112         | GTFP910 /// I 14271 |
| RABPK -8728         | ZMYM4 -5743           | ANF64 -2794        | HAS1 182            | CACNA1C 4112      | ZBTB37 14272        |
| ZNF397 -8727        | RP30 -5742            | VWDE -2793         | MEDAG 183           | SLC35F5 4114      | RXR8 14282          |
| RP3-406P24.1 -8726  | ITGB1BP1 -5741        | FBXO45 -2792       | ERP27 184           | CLDN10 /// U 4115 | DOCK5 14291         |
| G3BP1 -8725         | TRIM27 -5740          | NETO2 -2790        | BC041947 /// 185    | DCT 4116          | IKZF1 14293         |
| PCGF2 -8724         | DDAH1 -5739           | SMCR8 -2789        | BCLE 186            | CECR2 4117        | HLDBP 14295         |
| STSSA2 -8723        | FBXO22 -5738          | TRAF8 -2788        | PKD1 -2788          | KCHIP1 -2788      | COL4 14297          |
| DTNBP1 -8721        | DK6 -5737             | OSP -2787          | DKFZP434K02 188     | GPR37L /// I 4119 | FAM26F 14317        |
| CTC-471J1.2 -8720   | ZNF326 -5736          | DOLPP1 -2786       | LOC10192764 189     | CASP4 4120        | SOCCAC3 14319       |
| PLEHA7 -8719        | RP1-30M3.5 -5735      | SKA3 -2785         | TAS2R4 190          | CARD14 4121       | RBM48 14323         |
| RPIA -8718          | SMARCD1 -5734         | GNA11 -2784        | TRIM15 193          | C18orf61 4122     | WNT5B 14326         |
| KDM6B -8717         | ELAVL3 -5733          | TSPAN3 -2783       | CNN2 194            | ORF104P 4123      | PKP4 14334          |
| HEATR1 -8715        | SCY3 -5732            | LOC10192717 -2782  | MGC04103 195        | THEG5 4125        | SLC43P7 14337       |
| MAREP1 -8714        | XPT -5731             | SCRN3 -2781        | TRIM38 196          | KLCL 4128         | TRIM69 14342        |
| LOC10272431 -8713   | NCAM1 -5730           | HNRNPR -2780       | ELK4 197            | ZNF169 4129       | RASGRP2 14347       |
| PCMTD2 -8712        | SYCE2 -5729           | MBD4 -2779         | C1orf61 198         | GALNT5 4130       | DCN 14352           |
| SUGT1 -8711         | ADCY1 -5728           | RPA1 -2778         | LOC10013069 199     | TMPSR52 4131      | LOC400794 14358     |
| STAU1 -8710         | NRB1 -5727            | GTS1E -2777        | GAREM 200           | AICDA 4132        | SMYD2 14359         |
| FAM126B -8709       | HNRNPF -5726          | ZNF217 -2776       | CYC5 201            | SNR2 4133         | GFGR2 14362         |
| NAB1 -8708          | TMED4 -5725           | KNSTRN -2775       | BAGLT1 202          | GNB1L 4136        | SNK2 14372          |
| AP5M1 -8707         | DUXAP10 /// I -5724   | MRLP50 -2774       | EHBAP11 203         | POLD4 4137        | DR1 14373           |
| ALKB4 -8706         | DLG3 -5723            | CAMK2N2 -2773      | APOL6 204           | IFNW1 4140        | ENDOV 14376         |
| PPPAC -8705         | UBE2N -5722           | RBBP4 -2772        | FGF23 205           | LM52 4141         | AKR1C2 /// LC 14382 |
| CTMT4 -8704         | KIAA2026 -5721        | TSPC01 -2771       | FOLH1 /// FOI 206   | LOC283665 4142    | TACB4 14384         |
| FRA51 -8703         | ZBTB18 -5720          | FAM72A /// I -2770 | FU13 207            | NR12 4144         | NYA 14388           |
| CNCK12 -8702        | SAYS11 -5719          | MIR55 -2769        | LOC414161 208       | ADAM18 4145       | TMEM223 14390       |
| PTGR2 /// ZNI -8701 | ANKRD36BP2 -5718      | NSG1 -2768         | RP11-700H6.1 210    | CD300L8 4146      | RAB21 14391         |
| LRRN3 -8699         | CBX5 -5717            | NME1 -2767         | RUNX2 212           | RASGRF1 4148      | TP53AIP1 14397      |
| NATD1 -8698         | MARCKS -5716          | ZNF8 -2766         | BCLE 214            | ZBTB7B 4149       | WDR89 14398         |
| FADD -8697          | SNIP1 -5715           | SVIP -2765         | UBE2V2P3 /// 216    | AKAP13 4151       | C19orf47 14402      |
| TNSL -8696          | ZNF629 -5714          | PANK2 -2764        | FAM58 217           | TG 4153           | KSR2 14405          |
| DAD2 -8695          | SCY3 -5713            | LOC10192743 -2763  | GAD65B 219          | CD207 4155        | COL22A2 14407       |
| ZMYND8 -8694        | AKO55981 /// -5712    | C5orf15 -2762      | AKAP7 220           | OVOL1 4156        | SOX6 14409          |
| HDDC2 -8693         | PCDC5 -5711           | ING3 -2761         | NAMPT 224           | LINC00452 4157    | MYYH11 14410        |
| LINC00959 -8692     | NIPAL3 -5710          | NIF3L1 -2760       | PTCR4 225           | CTC1 4158         | LINC00938 14418     |
| SPTLC1 -8691        | ARL6 -5709            | RBM38 -2759        | DCT 226             | LOC10192913 4160  | EPM2A 14436         |
| GTF3C2 -8690        | PANK3 -5708           | CO3 -2758          | ACSM5 227           | C2orf73 4161      | R9orf47 14439       |
| LHDC9 -8689         | CEP19 -5707           | PAIP2 -5707        | MIR5183 /// I 228   | PAIP2 4164        | CARHSP1 14440       |
| TMEM116 -8688       | ENHO -5706            | FLAD1 -2756        | BOLA2 /// LOX 229   | ANKDD1A 4165      | LOC10192705 14444   |
| TNFRD2 -8687        | USP31 -5705           | C11orf73 -2755     | LG4 230             | PTPN5 4166        | LRP10 14453         |
| ZFA51 -8686         | SLC16A2 -5704         | IVD -2754          | SLC17A9 232         | CERS3 4167        | UBR4 14455          |
| WRAP53 -8685        | C21orf119 -5703       | CEP350 -2753       | LOC10099672 235     | FLJ2694 /// 4168  | TACSTD2 14459       |
| DUS4L -8684         | IFIT4 -5702           | MTPAP -2752        | PMP22 237           | SOR10 4169        | CAST 14462          |
| RFB1 -8683          | METL14 -5701          | MEI1 -2751         | PAIP1 -2751         | KYNU 4170         | MAGI2 14466         |
| DLG1 -8682          | ARHGEP9 -5700         | ANKF1 -2750        | SLC15A1 240         | SCorf47 4171      | ZBTB20 14472        |
| MTG2 -8681          | MRRP36 -5699          | HMG81 -2749        | BAGE2 /// BA1 241   | LINC00563 4172    | MROH2B 14474        |
| AES -8680           | METAP2 -5698          | KIA1731 -2748      | NAMPT 243           | TBL1XR1 4173      | LPP 14478           |
| FRMD3 -8679         | THUMPD1 -5697         | TATDN3 -2747       | VSTM4 244           | Xorf36 4176       | HAUS7 /// TR 14480  |
| FAM208B -8678       | APOO -5696            | MORNA -2746        | CA12 246            | LOC25654 4177     | Xorf36 14481        |
| RALA -8677          | BJF1 -5695            | MAJ2 -2745         | BP /// LOC14 249    | LOC10192891 4178  | TM6C 14482          |
| C12orf29 -8676      | PPP38 -5694           | BRD1 -2744         | LOC284294 251       | C1orf53 4179      | HERC1 14484         |
| RBM41 -8675         | ISY1 -5693            | GPATCH11 -2743     | PYHIN1 252          | TAS2R14 4180      | AMMECR1 14487       |
| ZNF275 -8674        | C6orf48 -5692         | SMARCA4 -2742      | SLC4A4 253          | TCN1 4183         | MAP2K6 14488        |
| ZNF44 -8673         | MIEF1 -5691           | DCAF5 -2741        | GAGE1 254           | TEX28 4184        | LINC00518 14489     |
| AKAP9 -8672         | KIAA0391 /// -5690    | HIRA -2740         | FAXDC2 255          | CIB3 4185         | IPW /// LOC10 14496 |
| SEC6 -8671          | DPD -5689             | CYC5 -2739         | DNX5 256            | LINC0103392 4186  | MAPA 14497          |
| MPHOSPH9 -8670      | SAMMS0 -5688          | SAAL1 -2738        | NDUFV1 257          | NDUFV1 187        | PRDM5 14498         |
| ERLN1 -8669         | LARS -5687            | ZFP30 -2737        | SPRY1 259           | SRGAP2 4188       | FAM129B 14515       |
| ACLY -8668          | MBD6 -5686            | GTPBP1 -2736       | AKO26714 /// 260    | RP56K5 4189       | TTL5 14524          |
| EIF2B2 -8667        | TTC28 -5685           | PSMA4 -2735        | MRRP31 261          | PRICKLE1 4190     | DSTYK 14527         |
| ARHGAP5 -8666       | BRCC3 -5684           | CCAR2 -2734        | HAB1 262            | GOT1L1 4191       | BRF1 14534          |
| SLC25A39 -8665      | ZNF628 -5682          | SVIP -2733         | LOC613266 264       | IL1BRAP 4193      | PATL1 14537         |
| BBS1 -8664          | WDR34 -5681           | TRAF2 -2732        | RNF145 265          | GNG2 4194         | ITGB3 14538         |
| ANOS -8662          | MIR6516 /// I 5-5680  | C16orf13 -2731     | HNF1B 269           | CHRNA6 4195       | SAV1 14545          |
| LOC389906 -8661     | ROR2 -5679            | CHAC2 -2730        | OTUD5 270           | KLKB1 4196        | SLC39A3 14547       |
| MAP9 -8660          | SHPRH -5678           | INIP -2729         | SNORD8 272          | GJB1 4197         | BMP1 14550          |
| SCAMP1 -8659        | BTRC -5677            | FIBP -2727         | DNAI4 273           | GSTK1 4200        | CREB3L1 14552       |
| KCNMB2 -8658        | TRRAP -5676           | HDFGRP3 -2726      | LOC10050746 274     | LINC00588 4201    | LMC01 14553         |
| CDC150 -8657        | SKOR2 -5674           | ENTR2 -2725        | XIST 275            | ENTR2 275         | COA1 14557          |
| ARPC1A -8656        | DACT3 -5673           | HMG84 -2724        | RP11-65L19.4 277    | ZNF483 4203       | PIGG 14561          |
| HDFFRP2 -8654       | AC144652.1 -5672      | YTHDF2 -2723       | PMCHL1 278          | FIGN 4204         | ENPP1 14562         |
| PTPRN2 -8652        | MYO1B -5671           | ZNF10 -2722        | KLRG2 279           | GPR115 4205       | GRIA3 14568         |
| URGPC -8651         | TTC28 -5670           | BRD2 -2721         | CXCR1 280           | DCBLD2 4207       | TRPM6 14578         |
| STARD9 -8650        | NOL4 -5669            | POLA2 -2720        | SLC2A9 281          | CTA-250D10 4208   | RAD51-AS1 14609     |
| ZNF111 -8649        | TNFR -5668            | TMEM129 -2719      | GAI4 282            | NCAM1 4209        | CE26L2 14611        |
| ZNF52P -8648        | NSTC3B -5667          | S100BP -2718       | IGHG1 283           | LAMA5-AS1 4210    | DNAF1 14614         |
| STRN3 -8647         | TOMM22 -5666          | AGPS -2717         | SP140L 286          | LOC339539 4211    | TPP2 14618          |
| TMEM41B -8646       | RBMX2 -5664           | DCUN1D3 288        | ZBTB20 288          | ZBTB20 4212       | EP51L1 14619        |
| CNPY3 -8645         | ABHD8 -5663           | RAB11A -2715       | ABCC3 289           | CLK4 4213         | LAMA3 14634         |
| ATG4D -8644         | LANCL1 -5662          | CNPY2 -2714        | LOC10265928 290     | PDE4DIP 4214      | CLASP1 14640        |
| KDM4A -8643         | CLA1 -5661            | TMEM129 -2713      | TSAC -2713          | NCAM1 4215        | CNBR2 14645         |
| RP511 /// SNK -8642 | ZNF8 -5660            | SRSF8 -2712        | ZFP36L1 294         | MIR612 /// N 4216 | AC141928.1 14647    |
| EIF4G1 -8641        | ZNF451 -5659          | FAM213A -2711      | LOC285902 /// 295   | SP110 4217        | CLEC12A 14649       |
| MIF4GD -8639        | MYO19 -5658           | PANK2 -2           |                     |                   |                     |

|            |          |              |         |              |        |               |             |              |          |             |          |            |       |
|------------|----------|--------------|---------|--------------|--------|---------------|-------------|--------------|----------|-------------|----------|------------|-------|
| HSP90A1    | -8636    | TADA3        | -5655   | DDX42        | -2707  | ALS2CL        | 300         | VNN3         | 4222     | DGKA        | 14671    |            |       |
| C22orf29   | /// I    | MTA3         | -5654   | ENPH1        | -2706  | COMMD10       | 303         | WLS          | 4223     | ORCS        | 14676    |            |       |
| SN         | -8634    | MNPD         | -5653   | PUS3         | -2705  | NFKB2         | 304         | RP1-170019   | :4224    | ORBS1       | 14678    |            |       |
| CL17orf58  | -8633    | UBN2         | -5652   | SH3B         | -2704  | SH3           | 307         | ORF24        | 4225     | SAM9DL      | 14683    |            |       |
| ATFH       | -8632    | GCN2         | -5651   | ZC3H14       | -2703  | CD40LG        | 309         | RECK         | 4226     | EMLA        | 14695    |            |       |
| GEMIN7     | -8631    | SEPS5CS      | -5650   | CCDC88A      | -2702  | YBX3          | 311         | RP11-124L9.5 | :4228    | PRRX1       | 14703    |            |       |
| GSE1       | -8630    | PFN2         | -5649   | GNAQ         | -2701  | DNAH1         | 312         | SOX9         | 4229     | CLUC5       | 14706    |            |       |
| FAHD1      | -8629    | MCM8         | -5648   | NANP         | -2700  | DHX8          | 313         | ETV6         | 4230     | CHIC1       | 14708    |            |       |
| MRPS18C    | -8628    | WRAP73       | -5647   | KBTBD2       | -2699  | DAAM2         | 314         | JDPE         | 4231     | EXOSC2      | 14724    |            |       |
| HELL1      | -8627    | ZNF47        | -5646   | NFRA1        | -2698  | NFRA1-IT1     | 316         | RAE1         | 4232     | LA52        | 14731    |            |       |
| SH         | -8625    | CEP290       | -5645   | MFHAS1       | -2697  | IKKBE         | 317         | GRB10        | 4235     | RBM15       | 14736    |            |       |
| ACOT7      | -8624    | DWNC2U1      | -5644   | CBX5         | -2696  | TYR           | 320         | LMF1         | 4236     | DENND1B     | 14737    |            |       |
| TMEM106B   | -8623    | CTPS2        | -5643   | CADM4        | -2695  | POM121L9P     | 321         | OGFR         | 4238     | CEACAM3     | 14748    |            |       |
| CLASP2     | -8622    | OIP5-AS1     | -5642   | FGF12        | -2694  | ANKUB1        | 322         | SH3D19       | 4239     | PDE1C       | 14750    |            |       |
| COP56      | -8621    | CHRA1        | -5641   | TMEM194A     | -2693  | 41153         | 323         | MTBP         | 4240     | FAM84A      | 14751    |            |       |
| HERC1      | -8620    | NDVAF1       | -5640   | CDKN2AIP     | -2692  | RHOD          | 326         | LOC10013392  | 4241     | ZNF554      | 14753    |            |       |
| WRPF5      | -8619    | ORMDL1       | -5639   | UPF4         | -2691  | B3GALT1       | 327         | FOSL1        | 4242     | STRN        | 14756    |            |       |
| MROH7-ITC4 | -8618    | ZNF253       | -5638   | F8XB03       | -2690  | STAR13-AS     | 330         | YES1         | 4244     | NYFC        | 14757    |            |       |
| TP53       | -8617    | FTSJ1        | -5637   | ACAT2        | -2689  | IL1RN         | 331         | TPP1         | 4246     | ECT2        | 14771    |            |       |
| IGLON5     | -8616    | ERF          | -5636   | LCORL        | -2688  | FCRL5         | 332         | CPNE8        | 4247     | ZFAND4      | 14773    |            |       |
| HYOU1      | -8615    | PP70B0       | -5635   | DLEU1        | -2687  | CEACAM1       | 334         | NPTXR        | 4248     | ANHX        | 14774    |            |       |
| APTX       | -8614    | C11orf54     | -5634   | DHXTD1       | -2686  | SUN5          | 335         | FNBP1        | 4249     | AGFG2       | 14775    |            |       |
| TOMM20     | -8613    | GAP93        | -5633   | ORAI2        | -2685  | HCCP1         | 345         | CSRP1        | 4253     | TREM2DC2    | 14776    |            |       |
| DENND1B    | -8612    | DMAPI1       | -5632   | MRS2         | -2684  | LUNC01082     | 337         | Clorf105     | 4255     | ZNF585B     | 14781    |            |       |
| DNAI4      | -8611    | FYN          | -5631   | ENPP4        | -2683  | LUNC00877     | 339         | EML4         | 4256     | PARVG       | 14783    |            |       |
| SBP3       | -8610    | E1F18        | -5630   | MBD3         | -2682  | GRIK2         | 342         | SSX3         | 4257     | CCDC14      | 14786    |            |       |
| KANSL1-AS1 | -8609    | TUBB8A       | /// TL  | -5629        | SCAMP1 | -2681         | LOC10106060 | 341          | CD48     | 4258        | SLC8A1   | 14788      |       |
| TRIM23     | -8608    | ZNHIT2       | -5628   | HSPA4        | -2680  | RORA          | 343         | SCD5         | 4259     | TMEM92      | 14791    |            |       |
| FGD5-AS1   | -8606    | TRIM27       | -5627   | TMEM50       | -2679  | NIPAL2        | 345         | NIPAL2       | 4261     | SLC15A1     | 14792    |            |       |
| ZYMM5      | -8605    | APIS         | -5626   | SMIM7        | -2678  | GNRHR         | 346         | HSID17B14    | 4262     | C20orf202   | 14796    |            |       |
| LAMTOR5    | -8604    | MIR302B      | -5624   | GLRB         | -2677  | SH3BP5        | 347         | CAPN5        | 4263     | TENM3       | 14807    |            |       |
| ATF6       | -8603    | TUBB4B       | -5623   | RP4-758J24.5 | -2675  | LPAR1         | 348         | TRIM22       | 4264     | KCNJ5       | 14813    |            |       |
| NMRAL1     | -8601    | MYYN         | -5622   | ZNF497       | -2674  | TAGLN         | 350         | LOC10192731  | 4265     | BTRC        | 14831    |            |       |
| NIN        | -8600    | E1F1         | -5621   | DDP2         | -2673  | EHD4          | 351         | FM06P        | 4266     | SNTB2       | 14836    |            |       |
| ZNF202     | -8599    | NRC1         | -5620   | XPO5         | -2672  | CASP5         | 352         | GLUL         | 4267     | PWWP2B      | 14841    |            |       |
| ALDH4A1    | -8598    | APOL         | -5619   | LARS         | -2671  | WAS           | 353         | LPAR5        | 4268     | SLC11A1     | 14844    |            |       |
| AKO74476   | -8597    | PUF60        | -5618   | MARPS18B     | -2670  | ZNF556        | 354         | MASP2        | 4269     | TNXX        | /// TNX1 | 14845      |       |
| MFF        | -8596    | WRDS         | -5617   | SEC22A       | -2669  | RRBP1         | 355         | RP6-91H8.2   | 4270     | ADHA        | 14847    |            |       |
| CLR1A      | -8595    | RSBN1        | -5615   | COG1         | -2668  | AKO96159      | 359         | RSPH6A       | 4271     | EBP         | 14856    |            |       |
| ACTR1A     | -8594    | PDZRN3-AS1   | -5614   | USP13        | -2667  | ARL4D         | 360         | ACO10145.4   | 4272     | PRKFB2      | 14857    |            |       |
| TIMM10     | -8593    | SLC1         | -5613   | SNAREC1      | -2666  | ARHGAP27      | 363         | AK74699      | 4273     | ZF1         | 14867    |            |       |
| FAM120AOS  | -8592    | R1OK2        | -5612   | C11orf59     | -2665  | KLF2          | 362         | SERPINB1     | 4274     | PROSC       | 14868    |            |       |
| LSM14A     | -8591    | ZC3H15       | -5611   | MTFH02L      | -2664  | CD1B          | 366         | ANO1         | 4275     | POU2F1      | 14876    |            |       |
| KDEL1      | -8590    | SOF2         | -5610   | SVIP         | -2663  | UNC13D        | 367         | POM121L12    | 4277     | ZNF425      | 14882    |            |       |
| METAP1     | -8589    | SP3          | -5609   | PHF21B       | -2662  | KLF8          | 369         | FZD2         | 4278     | DLG1        | 14884    |            |       |
| NOP16      | -8588    | MNT          | -5608   | DCAF17       | -2661  | LUNC00408     | 371         | SNRPN        | 4280     | UNC19B      | 14886    |            |       |
| ZNF34      | -8587    | TEI1         | -5607   | MIR4745      | ///    | ANKK48        | /// AN      | 372          | STAT6    | 4282        | AP2A1    | 14888      |       |
| ZNSCAN5    | -8586    | GNAL1        | -5606   | AURKB        | -2660  | IL34          | 374         | MDM2         | 4283     | WAPAL       | 14892    |            |       |
| TNF        | -8585    | ASNA1        | -5605   | PRPS1        | -2658  | RP11-496I2.2  | 375         | STON2        | 4287     | MAP4        | 14897    |            |       |
| PEX5       | -8584    | SPECCL1      | -5604   | RAB11FP2     | -2657  | MDFI          | 376         | RP11-274H2.1 | 4288     | ITPR2       | 14901    |            |       |
| CDR2       | /// LOC: | BOLA3        | -5603   | TIMM8B       | -2656  | SLCSA1        | 377         | ZRANB3       | 4289     | LUNC00674   | 14902    |            |       |
| UBR3       | -8582    | NRC2         | -5602   | TFDP2        | -2655  | KIAA1109      | 382         | ZC3HAV1      | 4293     | CSF1        | 14910    |            |       |
| SFR1       | -8581    | ITCH         | -5601   | CD20         | -2654  | F0XC2         | 386         | RP11-499E18  | 4294     | CAPN3       | 14914    |            |       |
| USP16      | -8580    | S0MC         | -5600   | ZC3H45       | -2653  | ALS2CL        | 387         | ITC7A        | 4295     | LUNC01410   | 14916    |            |       |
| TIMM23B    | -8579    | ZNF200       | -5599   | KIF14        | -2652  | LTF           | 388         | AK747031     | 4296     | MSA46A      | 14917    |            |       |
| WHSC111    | -8578    | PDAP1        | -5598   | PHIP         | -2651  | GS1-279B7.1   | 390         | HBE1         | 4297     | ZNF551      | 14918    |            |       |
| YKT6       | -8577    | NUDC2        | -5597   | USP1L        | -2650  | PADI1         | 391         | OCLM         | 4298     | YIF1B       | 14919    |            |       |
| NBURL      | -8576    | CAMK4        | -5596   | PRR12        | -2649  | FAM83A        | 392         | ZNF443       | 4299     | PM20D2      | 14920    |            |       |
| DHX34      | -8575    | SFA1         | -5595   | FAM24B       | -2648  | LUNA          | 393         | CASCA        | 4300     | TACS7D2     | 14921    |            |       |
| ZNF706     | -8574    | ZNF55        | -5594   | ATXN7        | -2647  | ATXN7         | 394         | ATXN7        | 4301     | BAEC2       | 14922    |            |       |
| ATP6V0C    | -8573    | SETBP1       | -5593   | SLC35E1      | -2646  | TRIM8         | 395         | KCNIP4       | 4303     | MIPOLL      | 14929    |            |       |
| GNB1       | -8572    | TBC1D15      | -5592   | BCIP1        | -2645  | SHOX          | 397         | GNB3         | 4304     | ATE1        | 14933    |            |       |
| NAE1       | -8571    | LUNC01420    | -5591   | NIFK         | -2644  | IGLV4-3       | /// IG      | 398          | COL6A6   | 4307        | CP       | 14939      |       |
| BC042372   | ///      | CENPJ        | -5590   | SEORBP1      | -2642  | ACO07401.2    | 399         | NPY2R        | 4309     | APOL6       | 14948    |            |       |
| MRPS5      | -8569    | EFPA1        | /// LC: | -5589        | GRSF1  | -2641         | SIDT        | 401          | ATP2A3   | 4310        | ARVCF    | 14954      |       |
| LMO3       | -8568    | TRK3         | -5588   | SRFBF7       | -2640  | LRB1          | 402         | ADH4         | 4311     | ZF1         | 14955    |            |       |
| DYRK2      | -8565    | TRIM44       | -5587   | KLC1         | -2639  | FLG-AS1       | 402         | LIRC32       | 4313     | FBXL20      | 14959    |            |       |
| TAM2       | -8564    | KIFC1        | -5586   | SVOP         | -2638  | FAM20A        | 403         | PDCD1        | 4314     | FBXW11      | 14962    |            |       |
| LRR1       | -8563    | ZNF264       | -5585   | RAB11FP2     | -2637  | A2M           | 404         | ARSK         | 4315     | NOVA1       | 14963    |            |       |
| SLC30A4    | -8562    | ELMO2        | -5584   | MAGEF1       | -2636  | AP2A1         | 406         | DHX30        | 4316     | ATRX        | 14967    |            |       |
| HPCA       | -8561    | MIAT         | -5583   | RPF2         | -2635  | NFKB2         | 408         | LSM14B       | 4317     | TCF11L2     | 14971    |            |       |
| OCS2       | -8560    | NR2C1        | -5582   | KIAAN008     | -2634  | NR2C1         | 409         | ADAM10       | 4319     | CHAB1       | 14976    |            |       |
| SCRN1      | -8559    | NOL8         | -5581   | BAG5         | -2633  | TAGAP         | 411         | LOC10192844  | 4320     | Clorf161    | 14977    |            |       |
| PACS2      | -8558    | LOC101932757 | -5580   | FMR1         | -2632  | POE4D         | 413         | IFNE         | 4321     | RAP2A       | 14978    |            |       |
| DOK6       | -8557    | RP56KB1      | -5579   | E1F5B        | -2631  | RHBDB1        | 414         | LLGL1        | 4322     | GAB1        | 14982    |            |       |
| FOXK2      | -8556    | BCRC3        | -5578   | TRIM32       | -2630  | RP11-164P12.4 | 415         | PHOSPHO1     | 4323     | ARL17A      | /// AR   | 14992      |       |
| RIML8      | -8555    | DCLE1EA      | -5577   | MRPL4        | -2629  | CDX1          | 416         | LOC728099    | 4325     | SRSF3       | 15002    |            |       |
| VPS13B     | -8554    | YF1          | -5575   | CC1          | -2628  | ANKP972       | ///         | 417          | 417      | TCAM1       | 15006    |            |       |
| RBM11      | -8553    | ATP11C       | -5574   | POU3F2       | -2627  | GRAP          | 418         | LOC101927871 | 4328     | ENG         | 15013    |            |       |
| TMEM167A   | -8552    | ITC37        | -5573   | SLB          | -2626  | BOLL          | 419         | DPEP2        | 4330     | LARP6       | 15020    |            |       |
| CNCF       | -8551    | PIA51        | -5571   | SLC41A3      | -2625  | TMEM39A       | 420         | TYRO3P       | 4331     | CDH19       | 15022    |            |       |
| COMMD5     | ///      | CA11         | -5570   | 3R777        | -2624  | PGLYRP4       | 421         | MSX2         | 4332     | SAMD10      | 15026    |            |       |
| FAM658     | -8549    | FOCAD        | -5569   | AC           | -2623  | TMEM92        | 423         | SEEL         | 4333     | FOLR2       | 15028    |            |       |
| IFT122     | /// LC:  | PE51         | -5568   | TARBP2       | -2622  | FAM71B        | 424         | FAM13A-AS1   | 4335     | MSA46A      | 15030    |            |       |
| PPP1R35    | -8547    | ATP11C       | -5567   | DPY19L1P     | -2621  | RHOI          | 425         | TM6F7        | 4325     | ZNF672      | 15038    |            |       |
| PSTPIP1    | -8546    | CEP89        | -5566   | SCAI         | -2620  | FKSG49        | 426         | TACSTD2      | 4338     | MUC13       | 15046    |            |       |
| CSD1       | -8545    | GAPDH        | -5565   | RNF157       | -2619  | PLA2G4F       | 427         | MMP11        | 4339     | TGF82       | 15048    |            |       |
| SETD2      | -8544    | EFTUD2       | -5564   | GD1          | -2618  | GLYATL1       | /// I       | 429          | 429      | LGALS13     | 4340     | STGGALNACA | 15049 |
| PKM        | -8543    | CHRNA3       | -5563   | POLH         | -2617  | PAX3          | 431         | TNS3         | 4342     | CA12        | 15051    |            |       |
| AMBR1A     | -8542    | NAPA         | -5562   | TSPAN3       | -2616  | FLT1          | 432         | ATMIN        | 4344     | JMJD7-PLA2G | 15056    |            |       |
| PMAA1      | -8541    | SLC1         | -5561   | SLC12A1      | -2615  | SUGT4         | 434         | RIP          | 4346     | POU5F1      | 15067    |            |       |
| ARBD2      | -8540    | DNAI12       | -5560   | ASPHD1       | -2614  | UNT2M2        | /// I       | 437          | 437      | FAM71C      | 4347     | DOCK1      | 15071 |
| SLC24A1    | -8539    | MGAT2        | -5559   | KIF4A        | -2613  | LOC10012938   | 438         | FAM65A       | 4348     | TANC2       | 15082    |            |       |
| HDAC5      | -8538    | APOM         | -5558   | ANKHD1       | /// I  | MYL12A        | 441         | CCDC144A     | 4349     | GOT1L1      | 15084    |            |       |
| FREL       | -8537    | PAR2         | -5557   | C11orf54     | -2611  | SERTAD1       | 442         | BN1          | 4350     | SCD5        | 15094    |            |       |
| NMR0D2     | -8536    | ERAS2        | -5556   | RIPPLY2      | -2610  | RUMK1-IT1     | 445         | CD160        | 4351     | PMF22       | 15096    |            |       |
| RHOT1      | -8535    | LOC1008906   | -5555   | LOC1008906   | -2609  | NARX          | 446         | PTSD         | 4353     | LOC1008906  | 15098    |            |       |
| AUH        | -8534    | LIRC57       | -5552   | NSG1         | -2608  | STAT6         | 447         | LOC10050687  | 4354     | TTL3        | 15098    |            |       |
| FYTD1      | -8533    | NCOR1        | -5551   | GPR137C      | -2607  | ATXN1         | 448         | LOC284669    | 4355     | ARL3        | 15102    |            |       |
| MRP19      | -8532    | LOC375196    | -5550   | ILKAP        | -2606  | EGF           | 450         | SPON1        | 4356     | LUNC01206   | 15103    |            |       |
| CREB1      | -8531    | MAP2         | -5549   | UBXN2A       | -2605  | MIR612        | /// NI      | 451          | 451      | RIMS4       | 4357     | PLD1       | 15104 |
| TMEM62     | -8530    | GP1BB        | /// SEP | -5548        | DEPDC1 | -2604         | SLC44A      | 452          | SLC405B1 | 4361        | PIEZO1   | 15109      |       |
| RRP7       | -8529    | PCAT1        | -5547   | POLR2B       | -2603  | GOLM3         | 453         | ACE2         | 4363     | CR11        | 15111    |            |       |
| 39142      | -8527    | BARO1        | -5546   | RBM17        | -2602  | GADD45B       | 454         | SLC11A1      | 4364     | ENG12       | 15115    |            |       |
| NAT9       | -8526    | ECHDC1       | -5545   | PICALM       | -2601  | FGF2          | 456         | TSPAN8       | 4366     | NDUFA11     | 15116    |            |       |
| MRPS21     | -8525    | CACTIN       | -5544   | YPEL1        | -2600  | GOLGA6L1      | ///         | 458          | 458      | LOC151657   | 4368     | Clorf153   | 15118 |
| LRR1Q3     | -8524    | GPAM         | -5543   | FAM126B      | -2599  | SNED1         | 459         | RAB31L       | 4369     | DEAF1       | 15120    |            |       |
| SMIM14     | -8523    | SRSF10       | -5542   | TM9SF1       | -2598  | TPG3          | 460         | SERPINB2     | 4370     | CLIP1       | 15124    |            |       |
| IND        | -8522    | PINA-AS1     | -5541   | BCLAF1       | -2597  | TMEM63A       | 461         | CFB          | 4371     | Clorf12     | 15126    |            |       |
| C2orf88    | -8521    | KCNH2        | -5540   | NFB9         | -2596  | HR            | 462         | FRMD8        | 4372     | EHD3        | 15128    |            |       |
| ATRX       | -8520    | PTPN9        | -5539   | PUM2         | -2595  | POUSF1        | /// PI      | 463          | 463      | STAB2       | 4373     | GNAS       | 15140 |
| STRN       | -8519    | MIR6125      | /// L   | -5538        | CCT2   | -2593         | DRD2        | 464          | PTFR     | 4374        | VPS      |            |       |



|             |               |              |              |              |              |              |               |             |              |             |               |
|-------------|---------------|--------------|--------------|--------------|--------------|--------------|---------------|-------------|--------------|-------------|---------------|
| IFT140      | -8483         | CCDC126      | -5503        | TMEM128      | -2557        | FGD2         | 520           | MKRN7P      | 4419         | CCDC82      | 15349         |
| ACVRS2A     | -8482         | ACSL6        | -5502        | SLC9A7       | -2556        | RB8P8NL      | 521           | PIK3CG2     | 4420         | MYT1        | 15368         |
| HCVR2A      | -8481         | MCPH1        | -5501        | CRYL21       | -2555        | ATP6AP1L     | 523           | LILRAS      | 4422         | CREBBP      | 15381         |
| C21orf58    | -8480         | C16orf13     | -5500        | TPSNB32      | -2544        | TPSNB32      | 524           | LINC01013   | 4423         | KLFB        | 15384         |
| TCF3        | -8479         | LOC389765    | -5499        | LOC730101    | -2553        | CTD-2076M15  | 525           | DEFB127     | 4425         | PSPC1       | 15386         |
| ORA2        | -8478         | WDR74        | -5498        | INT57        | -2552        | SRD5A2       | 526           | PGC         | 4426         | RARB        | 15389         |
| TMED1       | -8477         | TMCC1        | -5497        | ISY1         | -2551        | PROM2        | 528           | RNA5EH2B    | 4428         | TMPPRS15    | 15400         |
| AG03        | -8476         | RBM12        | -5496        | BRSK2        | -2550        | NR2F2-AS1    | 529           | SPHKAP      | 4429         | CEP128      | 15401         |
| SRM1        | -8475         | R8BP6        | -5495        | TMTCA        | -2549        | SYNP20       | 530           | SEPT5-GP1BB | 4430         | AXIN2       | 15407         |
| AC018755.16 | -8474         | TP15         | -5494        | AF5F1        | -2548        | FAM123B      | 531           | FAM123B     | 4431         | TRAF4       | 15408         |
| RS1         | -8473         | CHNRB2       | -5493        | ABAB8780     | -2547        | CCDC149      | 532           | HCAR3       | 4432         | ASS5        | 15410         |
| SRP72       | -8472         | C7orf55-LUC7 | -5492        | EBF1         | -2546        | SULTC2       | 533           | PM2         | 4433         | LPCAT2      | 15411         |
| PPWD1       | -8471         | C7orf25      | /// P5 -5491 | NUDT3        | /// RP -2545 | ADAMT510     | 534           | AX747261    | 4434         | AF3         | 15416         |
| ZC3H7A      | -8470         | SIK2         | -5490        | PPP2R2D      | -2544        | FGF14-IT1    | 535           | C20orf166   | 4435         | ADAM18      | 15420         |
| ELF4        | -8469         | DOX11        | -5489        | HINT2        | -2543        | GK-AS1       | /// Gk 536    | SAMD8       | 4436         | FNDC3B      | /// LC 15426  |
| GZF3        | -8468         | OLFML1       | -5488        | FAF2         | -2542        | MIR612       | /// NI 537    | IL17A       | 4438         | FCRL5       | 15431         |
| TC30B       | -8467         | TAFL1B       | -5487        | MTSL2        | -2541        | ADAMT56      | 539           | CTNXC2      | /// SLC 4439 | TBC1D7      | 15436         |
| RUFY2       | -8466         | RHBDD2       | -5486        | GCFC2        | -2540        | NCOA2        | 541           | PNM5A       | 4440         | TMEM39A     | 15440         |
| DNM1        | -8464         | PPP4R2       | -5485        | ATP6V0E2     | -2539        | PBOV1        | 542           | LYPD4       | 4442         | MYOF        | 15445         |
| ED1         | -8463         | TNRC6A       | -5484        | AIMP1        | -2538        | SLC2A14      | /// S 543     | KIR2DL2     | 4443         | IGHG1       | 15446         |
| DGL         | -8462         | ANKHD1       | /// A -5483  | STAG3L4      | -2537        | ACKR2        | 544           | NATD1       | 4444         | NUP50       | 15453         |
| ISLR1       | -8461         | MAPK19P1L    | -5482        | PIAS2        | -2536        | RP11-285F7.2 | 545           | ETV7        | 4448         | LMNA        | 15454         |
| TMEM106B    | -8460         | FTY1         | -5481        | PHIP         | -2535        | MI02         | 546           | CUBN        | 4449         | INTS6       | 15456         |
| ARHGFE26    | -8459         | VDAC3        | -5480        | HNRNP3A      | /// -2534    | FZD10-AS1    | 549           | EGFLAM-AS2  | 4450         | PPP2R5C     | 15466         |
| TCF3        | -8458         | ELP5         | -5479        | HEPACAM2     | -2533        | RAB3GAP2     | 551           | PGM5        | 4451         | PTPRB       | 15467         |
| RP4-81311.4 | -8457         | TRIP12       | -5478        | PHIP         | -2532        | ZNF736       | 552           | C1orf186    | /// 4452     | SLC7A2      | 15471         |
| RHEB        | -8456         | CASP2        | -5477        | SHROOM2      | -2531        | NAAA         | 553           | IPO8        | 4454         | NCAM1       | 15473         |
| ZNF786      | -8455         | SMARCC1      | -5476        | RNF44        | -2530        | ADAM15       | 555           | D5C3        | 4455         | ITPR2       | 15482         |
| FAM222B     | -8454         | BNIP2        | -5475        | PPP3R1       | -2529        | FRP2         | 558           | WDRY4       | 4457         | RNF168      | 15484         |
| ALG10       | /// ALG -8453 | RAB33B       | -5474        | PLAGL2       | -2528        | ITSN1        | 560           | HHLA3       | 4458         | KIF13A      | 15492         |
| HUWE1       | -8452         | NDE1         | -5473        | KNTC1        | -2527        | SPG20        | 561           | FLJ41170    | 4459         | BPXIP1      | 15501         |
| HOKA10-HOX  | -8451         | PRPF40A      | -5472        | C14orf93     | -2526        | EGR3         | 564           | RRH         | 4460         | STK35       | 15504         |
| E1F5B       | -8450         | RP11-95D17.1 | -5471        | STAU2        | -2525        | RBM47        | 565           | PAPOLG      | 4461         | NRP2        | 15505         |
| SLC16A9     | -8449         | GRR4         | -5470        | MDM2         | -2524        | LOC10272388  | 566           | PRB1        | 4462         | STRN        | 15511         |
| IMPAD1      | -8448         | FCF1         | -5469        | SNRNP25      | -2523        | STG3         | 567           | LOC1005064  | 4463         | BN1         | 15521         |
| RLINE       | -8447         | VPS13A       | -5468        | XPO1         | -2522        | CA14         | 568           | CYP2C9      | 4465         | FARS2       | 15523         |
| FAM111B     | -8446         | AUP1         | -5467        | TMX4         | -2521        | SPRED3       | 569           | SAMHD1      | 4466         | TIAM1       | 15536         |
| NCKAP1      | -8445         | SLC35E1      | -5465        | PHF19        | -2520        | RNLS         | 570           | BC070118    | 4467         | TMEM116     | 15542         |
| ZSCAN5A     | -8444         | PRPS2        | -5464        | ZNF607       | -2519        | FOX1         | 572           | C19orf66    | 4470         | ZNRD1       | 15544         |
| TMEM126B    | -8443         | C8orf2       | -5463        | SPAL7        | -2518        | PKFB2        | 574           | LMAN1       | 4471         | CYP19A1     | 15546         |
| SUPF7L      | -8442         | YBK1         | -5462        | YBK1         | -2517        | KNAB         | 576           | KNAB        | 4472         | SLC11A1     | 15553         |
| NFATC2IP    | -8441         | KHDC2        | -5461        | HTATSF1      | -2516        | LOC10050571  | 577           | ULR3B       | 4475         | IFB8        | 15562         |
| INVS1ABP    | -8440         | MCUR1        | -5460        | RP11-30566.4 | -2515        | ERVFH21-1    | 578           | PYGB        | 4476         | AKO55458    | 15576         |
| TSEN15      | -8439         | PIF1         | -5459        | MASTL        | -2514        | ENAH         | 583           | LOC283788   | 4477         | TGM4        | 15578         |
| PDIA6       | -8437         | TAB2         | -5458        | CCAR1        | -2513        | RBMS3        | 584           | AOC4P       | 4478         | ILSRA       | 15580         |
| ZNF436      | -8436         | GCAT         | -5457        | CAPRN1       | -2512        | LOC10192844  | 585           | PRYR12      | 4479         | NAPEPLD     | 15582         |
| MARK8       | -8435         | AGTPBP1      | -5456        | YBFB1        | -2511        | LOC101187    | 586           | CARD11      | 4480         | POU2F2      | 15588         |
| SCARB2      | -8434         | PHF1         | -5455        | BOB1         | -2510        | RP11-812E11  | 587           | ABRA        | 4481         | HNRNPCC     | 15594         |
| NFYC        | -8433         | NAP1L4       | -5454        | ZCCHC17      | -2509        | ACAP1        | 588           | CD274       | 4482         | GGT1        | /// GGT 15604 |
| ITPR1L      | -8432         | TRIP4        | -5453        | SLC25A40     | -2508        | TBC1D27      | 590           | RPH3AL      | 4483         | CNOT4       | 15611         |
| ATFS        | -8431         | RBM45        | -5452        | CKMT2-AS1    | -2507        | RP1-118J21.2 | 591           | LOC10065295 | 4486         | PGR         | 15612         |
| NRG1        | -8430         | ADNP         | -5451        | KIF2C        | -2506        | FKSG49       | 592           | MUSTN1      | /// I 4488   | LMNA        | 15617         |
| RTN1        | -8429         | FAM103A1     | -5450        | SMURF2       | -2505        | AK093362     | /// 595       | BAZ2A       | 4489         | ATOH8       | 15623         |
| RAB39       | -8428         | TMEM1170A    | -5449        | BOB1         | -2504        | BC03266      | /// 597       | COX6CP2     | /// 4491     | C12orf45    | 15624         |
| ZFAND2B     | -8427         | CNIH4        | -5448        | XKRC5        | -2503        | ABO          | 599           | ITGA11      | 4493         | PMP22       | 15639         |
| HNRNPH1     | -8426         | KATNB1L      | -5447        | WDR7         | -2502        | BTAGE5       | /// M 600     | MUC3B       | 4494         | SH3BP2      | 15647         |
| SNX13       | -8425         | CACNB3       | -5446        | SUGT1        | -2501        | SELP         | 601           | PCED1B-AS1  | 4495         | SLC39A8     | 15664         |
| WDFY3-AS2   | -8424         | PNO1         | -5445        | HEATR2       | -2500        | PRRX2        | 602           | P2RY6       | 4497         | TFE2        | 15665         |
| Y11         | -8423         | LINC00461    | /// -5444    | PSMB7        | -2499        | UM53-LOC441  | 603           | CSPG4P5     | 4498         | SLC29A2     | 15669         |
| SELF4       | -8422         | ACTD20       | -5443        | KCTD15B      | -2498        | LINC00911    | 604           | TFE14       | 4499         | IGT82       | 15672         |
| LRP8        | -8421         | ACIN1        | -5442        | NTPCR        | -2497        | LOC284395    | 606           | BC044611    | /// 4500     | FLYWCH1     | 15673         |
| ATAT1       | -8420         | ELOVL6       | -5441        | WDR13        | -2496        | OTUB2        | 608           | SVT2        | 4501         | SMAD2       | 15675         |
| LRRCC1      | -8419         | EFNB3        | -5440        | HAUS2        | -2495        | PRSS23       | 610           | IAPP        | 4502         | FASN        | 15679         |
| RDH13       | -8418         | DOPEY1       | -5439        | ALFK1        | -2494        | IFB4         | 612           | IFNA17      | 4503         | FAM208B     | 15686         |
| POPS        | -8417         | CYBBE1D2     | -5438        | ZFPHZ3       | -2493        | CLIQ1NF9     | /// 613       | IFNB5       | 4504         | MTMR11      | 15688         |
| STXBPA      | -8416         | YBX3         | -5437        | ZEB2         | -2492        | YBX3         | 614           | HEXA        | 4505         | FAM16A2     | 15690         |
| CBX2        | -8414         | SLC43A3      | -5436        | CKNMB2       | -2491        | ALDOA2       | 615           | TNNT3       | 4506         | AXL         | 15695         |
| ANKRD40     | -8413         | CDPF1        | -5435        | CYP51A1      | /// I -2490  | CA12         | 616           | TGIF1       | 4508         | SLC35A2     | 15696         |
| PRKAG2-AS1  | -8412         | TGFS2        | -5434        | SNAP25       | -2489        | HLA-DPB1     | 617           | LOC10013064 | 4510         | LMCD1       | 15709         |
| NUZF2       | /// NU -8411  | MIR943       | /// NI -5433 | GTF2A2       | -2488        | OR7E111P     | /// 618       | GRPR        | 4511         | NAMPT       | 15716         |
| MEF2B       | -8410         | LOC10192793  | -5432        | C8orf33      | -2487        | EDN1         | 619           | LOC1005058  | 4512         | LOC10192889 | 15717         |
| ZDNH2       | -8409         | ACT3         | -5431        | MIR33        | -2486        | DIPK3        | /// DP1 620   | LINC00354   | 4513         | NSMCE4A     | 15721         |
| BSG         | -8408         | TBC1         | -5430        | APCS         | -2485        | BMP4         | 621           | BMP4        | 4515         | TMEM165     | 15722         |
| ALG13       | -8407         | CCDC15       | -5429        | KBTBD4       | -2484        | SLC8A1       | 622           | CIDEA       | 4516         | LOC10192959 | 15726         |
| TMEM200C    | -8406         | LMAN2L       | -5428        | FAM210A      | -2483        | FCRLB        | 623           | KRT10       | 4517         | PKA         | 15730         |
| HNRNP18     | -8405         | SLC10A4      | -5427        | WDRH1        | -2482        | LOC10192968  | 627           | ARPP21      | 4518         | CNDP2       | 15732         |
| TMEM259     | -8404         | SEN2P        | -5426        | DFFA         | -2481        | PTBP1        | 628           | FAM214B     | 4519         | TRIP12      | 15751         |
| USF9B       | -8403         | MEAF6        | -5425        | WDR6         | -2480        | ZNF624       | -2479         | FBXL8       | 4521         | C12orf8     | 15753         |
| CHD6        | -8402         | ACT5         | -5424        | TERF1        | -2479        | CAA          | /// CAB / 632 | RP11-495P10 | 4522         | CHD7        | 15757         |
| SZRD1       | -8401         | AXSL2        | -5423        | LOC10099651  | -2478        | FAM129B      | 633           | HHP1-AS1    | 4523         | MSA46A      | 15763         |
| RCHY1       | -8400         | C1D          | -5422        | RAD17        | -2477        | SH3GL3       | 635           | RTTN        | 4524         | TCTN2       | 15766         |
| TCF3        | -8399         | USP42        | -5421        | ZNF574       | -2476        | ABCG4        | 639           | SMOCC2      | 4525         | NRG1        | 15767         |
| DIS3        | -8398         | DNAI2C       | -5420        | GUF1         | -2475        | PRDM1        | 641           | CREB3L1     | 4527         | POE4D       | 15777         |
| PHL3        | -8397         | TMEM200B     | -5419        | RBM12B       | -2474        | SAPF0L       | 642           | EPAD0NL     | 4528         | GC4A1A      | 15778         |
| PP36        | -8396         | CCSA         | -5418        | CCSA         | -2473        | CHD9         | 643           | PLAC3       | 4529         | NET         | 15781         |
| ZNF536      | -8395         | ZBT82        | -5417        | TMEM185B     | -2472        | ZNF577       | 644           | TTL7-IT1    | 4532         | CSRN2P      | 15781         |
| PBX3        | -8394         | CNOT7        | -5416        | TSR1         | -2471        | LRMP         | 645           | SDPR        | 4533         | PDGFRA      | 15782         |
| TMEM168     | -8393         | EWSR1        | -5415        | ZNF146       | -2469        | KIR2DS1      | 646           | RP11-297L17 | 4534         | CD109       | 15785         |
| EBAG9       | -8392         | LAMTOR5-AS1  | -5414        | SNRPD3       | -2468        | FZD4         | 648           | ZNF578      | 4535         | HLA-DOA     | 15794         |
| NUFIP1      | -8391         | TRPC1        | -5413        | RAN          | -2467        | CCDC14B      | 649           | LINC00663   | 4538         | LRP1        | 15795         |
| NAP2K4      | -8390         | AGO2         | -5412        | BOB1         | -2466        | BOB1         | 650           | NAA0125     | 4539         | ARSD        | 15796         |
| TCEA2       | -8389         | ACL1928.1    | -5411        | ZNF784       | -2465        | BGLT3        | 653           | SEPNIN4L3   | 4541         | SIM1        | 15798         |
| ZNF791      | -8388         | GDPD1        | -5410        | CDKN2C       | -2464        | NACC1        | 654           | NPEPL1      | 4542         | MVK         | 15803         |
| FRYL        | -8387         | PAN3-AS1     | -5409        | TRKH         | -2463        | MPC1         | 655           | ADD3-AS1    | 4543         | HFE         | 15810         |
| BBS9        | -8386         | C11orf83     | -5408        | DSCAML1      | -2462        | PLG1B2       | 656           | BNC2        | 4545         | TMEM259     | 15821         |
| C7orf26     | -8385         | ZSCAN1B      | -5407        | BA21B        | -2461        | LOC10272409  | 659           | IFITM3      | 4547         | FLJ40288    | 15824         |
| SSCA1       | -8384         | PPP1R1       | -5406        | NDFY4        | -2465        | NDYF1        | 660           | LOC10050736 | 4548         | HFE         | 15824         |
| TAOK1       | -8383         | FAM184B      | -5405        | DNAAF3       | -2459        | BD34319      | /// 661       | LOC10050705 | 4549         | HUWE1       | 15833         |
| BCKDHB      | -8382         | TM6DNC9      | -5404        | CFBAZ2       | -2458        | LOC10272484  | 662           | C4BP4       | 4550         | ME1         | 15845         |
| MDH1        | -8381         | VCPKMT       | -5403        | WDR17        | -2457        | FKSG49       | 669           | ZNF746      | 4551         | RP11-456O19 | 15853         |
| AREL1       | -8380         | MIR1292      | /// I -5402  | PTPRG        | -2456        | GSDMD        | 670           | SLC39A12    | 4553         | MMP8        | 15854         |
| CHMP3       | /// RP -8379  | SON          | -5401        | ZNF230       | -2455        | JUNB         | 672           | CYP4F11     | 4554         | GLS         | 15855         |
| PTPRG       | -8378         | MTR          | -5400        | HNRNPDL      | -2454        | PROM2        | 673           | NAA0A       | 4555         | NAA0A       | 15858         |
| TSR1        | -8377         | CASP2        | -5399        | CDK1         | -2453        | FKSG49       | 674           | SLC12A1     | 4557         | PHF20       | 15860         |
| PCDH9       | -8376         | HSP90AA1     | -5398        | AADAT        | -2452        | XYL72        | 675           | PTGER3      | 4558         | TLOC1       | 15863         |
| HRH3        | -8375         | DDX52        | -5397        | SMARCCAD1    | -2451        | BC038731     | /// 676       | ATP6V0D2    | 4559         | PHYKPL      | 15871         |
| SEC63       | -8374         | DTWD1        | -5396        | KLHL2        | -2450        | LOC10050687  | 677           | ARNT        | 4561         | ADCY2       | 15883         |
| PCMA2       | -8373         | PIEZO2       | -5395        | TMEM246      | -2449        | AQP5         | 679           | RNF32       | 4562         | CHDH        | 15885         |
| POK         | -8372         | ACD          | -5394        | GLEE         | -2448        | TRIM34       | /// TR 680    | VSIG1       | 4563         | EPSS        | 15887         |
| RAB14       | -8371         | METTL10      | -5392        | DIRAS1       |              |              |               |             |              |             |               |

|              |               |             |                 |           |              |                 |               |              |              |             |             |
|--------------|---------------|-------------|-----------------|-----------|--------------|-----------------|---------------|--------------|--------------|-------------|-------------|
| DNAJCS       | -8335         | CD21        | -5355           | PPIG      | -2411        | CLDN17          | 732           | TNKS         | 4625         | COL27A1     | 16044       |
| GPATCH8      | -8334         | PTPNS       | -5354           | CMC2      | -2410        | VIPR2           | 733           | GRHL2        | 4626         | MKNK1       | 16046       |
| DNAJC4       | -8333         | ALOR1B      | -5353           | TCERG1    | -2409        | ASPA            | 734           | ZNF429       | 4629         | MUC4        | 16049       |
| MAVS         | -8332         | GRBP        | -5352           | CLF50     | /// U        | GI2R            | 736           | MORNL        | 4630         | ZNF529      | 16055       |
| RSMN1L       | -8331         | FSTL5       | -5351           | H2BFX     | -2407        | LOC10192866     | 739           | DIAPH2       | 4631         | ARRB1       | 16059       |
| NAIP         | -8330         | SRGAP1      | -5350           | TMEM18    | -2406        | PLA2G4A         | 740           | C2CD2        | 4633         | BCAP29      | 16066       |
| HSPA4L       | -8329         | RSPH3       | -5349           | ZNF304    | -2405        | IKBK6           | 742           | PSEN1        | 4634         | TAGAP       | 16069       |
| GKAP1        | -8328         | ARFGF1      | -5348           | TTL       | -2404        | ADAP1           | 743           | KIF13A       | 4636         | FGF14       | 16073       |
| AK2          | -8327         | SNAPC3      | -5347           | OARD1     | -2403        | F2RL3           | 744           | MIR7515      | ///          | CCDC186     | 16076       |
| FAM120A      | -8326         | NAK         | -5346           | NLGN2     | -2402        | LOC10192776     | 745           | EFNB         | 4640         | KDM3A       | 16078       |
| UH1          | -8325         | GZ2         | -5345           | FLVCR1    | -2401        | BRD4            | 746           | EHD4         | 4641         | CRABP1      | 16079       |
| NDUF88       | -8324         | TUBD1       | -5344           | LEO1      | -2400        | PPM1L           | 747           | UPK1B        | 4645         | CDK9        | 16095       |
| PNK1-AS      | -8323         | MTHF01      | -5343           | MTHF01    | -2399        | ALPK1           | 748           | CCDC184      | 4646         | PAPLN       | 16099       |
| WNT10A       | -8322         | E1F1        | -5342           | NCBP2-AS2 | -2398        | STAB1           | 749           | CXCR6        | 4647         | SNCA        | 16110       |
| RARA         | -8321         | JMJD4       | -5341           | PARBP8    | -2397        | RBM33           | 750           | SAT1         | 4652         | POSSB       | 16117       |
| PTGR1        | -8320         | SURF2       | -5340           | FAM161A   | -2395        | AKR1C2          | /// LC 751    | IFNAR2       | 4653         | EDRF1       | 16121       |
| PHF21A       | -8319         | NUP50       | -5339           | SET       | -2394        | LOC10192933     | 752           | LOC644090    | ///          | BC053266    | ///         |
| FRAT1        | -8318         | C6orf62     | -5337           | AIMP1     | -2393        | SLOC1C1         | 755           | LOC10024077  | 4657         | PSEN1       | 16127       |
| CNOT8        | -8317         | PLCXD2      | -5336           | NDUFS1    | -2392        | SAMD12          | 756           | LOC642236    | 4661         | PHYKPL      | 16128       |
| BCAS3        | -8315         | SEC61A2     | -5335           | THOC2     | -2391        | RPS6KA4         | 757           | IGF2BP2      | 4663         | KIF5A       | 16133       |
| SEC63        | -8314         | GCSH        | /// LOC: -5334  | CEP70     | -2390        | APOB            | 758           | LOC10192905  | 4664         | CD8A        | 16135       |
| PARG6A       | -8313         | TMEM74      | -5333           | RNF14     | -2389        | CNS151          | 761           | TSSK3        | 4665         | MYO1C       | 16147       |
| ARID4B       | /// RB        | WDR51       | -5332           | UBR7      | -2388        | SAMSO4          | 762           | HPG2         | 4666         | PXB         | 16156       |
| SRF7         | -8310         | ACBD5       | -5330           | LONRF2    | -2387        | FER1L4          | 764           | LOC10050644  | 4667         | INPP4B      | 16162       |
| NSMCE4A      | -8309         | NAALAD1L    | -5329           | RBM33     | -2386        | XPNPPEP1        | 766           | RNF187       | 4668         | KMT2A       | 16164       |
| TSYPL1       | -8308         | GSGN2       | -5328           | CENB1P1   | -2385        | FAM179A         | 770           | SEBOX        | /// VT1      | FCRL2       | 16167       |
| BNIP3        | -8307         | USP45       | -5327           | POLR3A    | -2384        | GP82            | 772           | RNF212B      | 4675         | BMP1        | 16168       |
| NDUFS5       | /// R1        | SMURF2      | -5326           | DOCK7     | -2383        | KLK6            | 775           | ALOX15B      | 4674         | SLC39A8     | 16179       |
| EF3B         | -8305         | ATF5        | -5325           | SFB4      | -2382        | RAPGEF3         | 776           | SLK4         | 4675         | SLK4        | 16205       |
| FEM1A        | -8304         | H3F3A       | /// H31 -5324   | SMIM8     | -2381        | MIR281B         | 778           | RNF187       | 4677         | NABP1L      | 16206       |
| ATP5B        | -8303         | PLEKHG4     | -5323           | C7orf55   | -2380        | CDH6            | 779           | NTSDC4       | 4678         | R3HC1L      | 16207       |
| IKZF4        | -8302         | PIGH        | -5322           | FLJ37453  | -2379        | TTC7A           | 780           | CYLD         | 4679         | DYRK1A      | 16215       |
| PDZD8        | -8301         | APPB2       | -5321           | C2CD5     | -2378        | TCF7L2          | 781           | GRHL1        | 4683         | KLK2        | 16222       |
| AGD03        | -8300         | FAM104A     | -5319           | PAGR3     | -2377        | FAM201B         | /// 783       | FMO1         | 4684         | TPMT        | 16227       |
| ALG6         | -8299         | WDR61       | -5318           | BCAS2     | -2376        | RP11-110C10.785 |               | AGT1         | 4685         | TCF3        | 16236       |
| TPST         | -8298         | TRMT61B     | -5317           | MESANTD3  | -2375        | KRTAP4-1        | 787           | SPIN2A       | 4686         | ZCCHC14     | 16239       |
| DIEKF        | -8297         | FANCA       | -5315           | DYCN1L    | -2374        | MIR29A          | /// M 788     | LMNA         | 4687         | CYP4A11     | /// C 16242 |
| USP42        | -8296         | IPW         | /// LOC1C -5314 | LRBA      | -2373        | LOC10050740     | 790           | LOC10192824  | 4688         | NR1I2       | 16245       |
| RAB27A       | -8295         | SRP9        | -5313           | NDUFS4    | -2372        | CD300LG         | 792           | HPYR1        | 4689         | BCL2L1      | 16250       |
| GALNT11      | -8294         | RBN1        | -5312           | RPL26L1   | -2371        | HMGCS2          | 793           | CA1          | 4690         | NCKAP1      | 16256       |
| RRC4         | -8293         | SF3A1       | -5311           | SPK2      | -2370        | 795             |               | FAM68P9      | 4691         | CRF9        | 16259       |
| RP3-522P13.2 | -8291         | ASXL2       | -5310           | FAM112B   | -2369        | CAMK2B          | 796           | LOC440982    | ///          | MASP1       | 16262       |
| HNRNPDL      | -8290         | RCTB1       | -5309           | RBM25     | -2368        | EHD3            | 797           | PABPC1       | 4693         | ATP10B      | 16266       |
| SLC39A6      | -8289         | ABHD13      | -5308           | PDC13     | /// PK -2367 | OR12D2          | 799           | ATP1B4       | 4694         | LOC10050663 | 16269       |
| SAP18        | -8288         | MIR3656     | /// T -5307     | ZFP69     | -2366        | SLOC1C1         | 802           | PPP1R1       | 4695         | UBE2O       | 16274       |
| HOKA7        | -8287         | MYSM1       | -5306           | FAM19A5   | -2365        | LOC10012919     | 807           | CD109        | 4696         | ANKDD1A     | 16277       |
| MRF510       | -8286         | MCL1        | -5305           | LMNT2     | -2364        | MET             | 807           | SLC12A3      | 4698         | LOC624852   | 16281       |
| TEM43        | -8285         | MAPT        | -5304           | ZNF141    | -2363        | STAR            | 809           | LINC00910    | 4700         | CS3         | 16284       |
| MED8         | -8283         | LINC00957   | -5303           | SEMA6A    | -2362        | LOC10192834     | 810           | NFAM1        | 4701         | COMT        | 16284       |
| CREBBP       | -8282         | ZNF891      | -5302           | REEP1     | -2361        | SLC2A3          | 811           | SIRPD        | 4702         | C2orf72     | 16287       |
| MRPL57       | -8281         | GSR         | -5301           | TGS1      | -2360        | H19             | /// MIR6: 812 | FGD2         | 4703         | PRDM5       | 16295       |
| SMAD2        | -8280         | LN78        | -5300           | NAASO     | -2359        | NFKBIA          | 814           | FBXO4        | /// U 4706   | IRGQ        | 16302       |
| PRPF40A      | -8279         | SRP14       | -5299           | SNORA29   | /// -2358    | ENPP1           | 814           | SIGLEC5      | 4707         | C1orf68     | 16304       |
| PIA40556     | -8278         | TMEM4       | -5298           | MIR47     | -2357        | MIR47           | 815           | CHRB2        | 4708         | NF58        | 16306       |
| PARL         | -8277         | RNMD5B      | -5297           | SLRP      | -2356        | RP11-32413.1    | 817           | GSTM5        | 4709         | FUT3        | 16308       |
| CUEDC1       | -8276         | LPHN3       | -5296           | MRPL28    | -2355        | LOC10012865     | 819           | AMACR        | 4710         | RBPMS       | 16314       |
| UFL1         | -8275         | C1QB        | -5295           | TXNL4A    | -2354        | PSG5            | 820           | MAPK12       | 4711         | CD84        | 16320       |
| PUSL1        | -8274         | SERF1       | /// SE -5294    | ARLGP1    | -2353        | ARFGAP2         | 821           | OSBP10       | 4712         | PARP14      | 16328       |
| SRP54        | -8273         | CENPD1P1    | /// -5293       | SKP2      | -2352        | FLVCR2          | 823           | KLK2         | 4713         | SNR2        | 16329       |
| FAF4H1B1     | -8272         | TMEM16      | -5292           | NPR4      | -2351        | DNOC1           | 824           | LOC10192691  | 4714         | CD84        | 16345       |
| C17orf70     | -8271         | ZNF252P     | -5291           | AGPAT5    | -2350        | LOC1000668      | 825           | TAPT1        | 4718         | MLX         | 16348       |
| FARP2        | -8270         | CEP78       | -5290           | RNF3A     | -2349        | GRIK1-AS2       | 827           | SPTBN1       | 4719         | SOS2        | 16358       |
| SNX13        | -8269         | TRNT1       | -5289           | CACNA1D   | -2348        | LOC340340       | 828           | TPBG         | 4720         | CARD14      | 16365       |
| ATRN         | -8268         | METAP2      | -5288           | PPP2R5E   | -2347        | LOC10192911     | 829           | RNF186       | 4721         | SNAMD1      | 16366       |
| KAT6B        | -8267         | FAM174A     | -5287           | STARO7    | -2346        | BHD2            | 831           | PRDM9        | 4723         | C18orf61    | 16370       |
| KTSC         | -8266         | ELOC1       | -5286           | CAH5E     | -2345        | FLJ11292        | 832           | FILIP1       | 4724         | NTRK2       | 16371       |
| LOC10013493  | -8264         | DCH51       | -5284           | SRSF3     | -2344        | IFNA14          | 833           | STYXL1       | 4725         | CHN2        | 16373       |
| SRSF6        | -8263         | LOC10012936 | -5283           | NRXN1     | -2343        | ARHGFE12        | 834           | ZNF425       | 4726         | SLC29A2     | 16380       |
| TIMM8A       | -8262         | PIH1D1      | -5282           | SYNCRIP   | -2342        | CTAGE4          | /// C1 836    | SLC19A3      | 4727         | VAPA        | 16387       |
| ATL2         | -8261         | MAPK8       | -5281           | BLOC156   | -2341        | LINC01339       | 838           | RHOQ         | 4729         | DPP9        | 16414       |
| SLC30A5      | -8260         | PAP1        | -5280           | CENPF     | -2340        | LINC00599       | /// 839       | SLC40A1      | 4730         | SASH1       | 16418       |
| LOC10012936  | -8259         | LOC10012936 | -5279           | HMG1A     | /// U -2339  | LOC10050804     | 843           | LOC1019285C  | 4731         | ZNF5F11B    | 16421       |
| ATP5L        | -8257         | ZSCAN16-AS1 | -5278           | RALGAP1A  | -2338        | ZNF287          | 842           | NF287        | 4732         | ARNT        | 16427       |
| PRR14        | -8256         | PPM1E       | -5277           | ZNF202    | -2337        | DSCAM-AS1       | 846           | CSGALNACT2   | 4734         | AKAP13      | 16442       |
| PNKP         | -8255         | CACNB3      | -5276           | FAM105A   | -2336        | SOX10           | 847           | FOSL2        | 4735         | XAF1        | 16449       |
| ATR          | -8254         | AGBL3       | -5275           | CLGN      | -2334        | CDH17           | 849           | BNP2         | 4736         | L3MBTL1     | 16451       |
| AP52         | /// C15 -8253 | ENOSF1      | -5274           | NUP214    | -2333        | SLC11A1         | 850           | EPOR         | 4737         | SPLM3       | 16453       |
| RP2          | -8252         | UBAL2L      | -5273           | UBAL2     | -2332        | LOC10192770     | 872           | ARSD         | 4750         | PLKCD2      | 16514       |
| MIR7114      | /// I -8251   | DDP3        | -5272           | ZND4      | -2331        | NR5F1           | 879           | COL18A1      | 4751         | RNF1        | 16515       |
| CUL5         | -8250         | BBIP1       | -5271           | CDH2      | -2330        | RP11-456019     | 853           | HTRSA        | 4740         | ACACB       | 16467       |
| ULK2         | -8249         | SNRNP       | /// SNI -5270   | SART3     | -2329        | MBL2            | 856           | ARVCF        | 4741         | DDX59       | 16470       |
| ASXL3        | -8248         | CRYL1       | -5269           | NSMCE4A   | -2328        | APOLA4          | 857           | STAB2        | 4742         | PPAP2B      | 16476       |
| APP4         | -8247         | PEX14       | -5268           | FARS8     | -2327        | LOC10192705     | 859           | LM13         | 4743         | IGF1R       | 16483       |
| PPP2R4       | -8246         | CKOCPC2     | -5267           | PRMT1     | -2326        | PRDM5           | 860           | CEBPB        | 4744         | IGF2OL2     | 16484       |
| CKX          | -8245         | SNK1        | -5266           | SNK1      | -2325        | ATG1            | 862           | BOI2         | /// LO: 4745 | STX16       | 16492       |
| PGM3         | -8244         | WHSC1       | -5265           | UG1       | -2324        | SSH3            | 864           | TRABD2A      | 4746         | METTL15     | 16501       |
| GSTM3        | -8243         | SNN         | -5264           | DCAF16    | -2323        | AX746823        | 865           | CPB2         | 4747         | KIAA0226    | 16503       |
| AKAP17A      | -8242         | VARS        | -5263           | UBE2V2    | -2322        | LINC00478       | 868           | SOX9         | 4748         | TMCO3       | 16506       |
| TTC13        | -8241         | ANK1        | -5262           | ASH1L     | -2321        | TINAGL1         | 870           | FOXP3        | 4749         | PSMB2       | 16512       |
| ZNF74        | -8240         | NARF2       | -5260           | CERS3     | -2320        | LOC10192770     | 872           | ARSD         | 4750         | PLKCD2      | 16514       |
| CH24         | -8239         | MIR57       | -5259           | MIR57     | -2319        | NR5F1           | 879           | COL18A1      | 4751         | RNF1        | 16515       |
| PRPF40A      | -8238         | RACS2       | -5258           | SMC3      | -2318        | AC007967.3      | 876           | ORLX1        | /// OR 4752  | CKLK        | 16517       |
| SYT9         | -8237         | MAGOH       | /// M -5257     | RBN1L1    | -2317        | FAXDC2          | 878           | PLACA        | 4753         | MCFL2       | 16528       |
| GTFC3        | -8236         | SYN12BP     | /// S' -5256    | SLC27A2   | -2316        | TRIM15          | 879           | S100A5       | 4754         | MYB         | 16530       |
| ZNF343       | -8235         | ZBED1       | -5254           | ZNF777    | -2315        | RP11-805124     | 875           | CCDC170      | 4755         | LOC10099650 | 16532       |
| MED8         | -8234         | MCPH1       | -5253           | SART3     | -2314        | C20orf202       | 881           | LINC01272    | 4756         | DRK1A       | 16539       |
| TTC18        | -8233         | NCOA1       | -5252           | APPBP2    | -2313        | APPBP2          | 882           | ITGA12       | 4757         | ITGA12      | 16541       |
| MINPP1       | -8232         | ZNF518B     | -5251           | SV2A      | -2312        | VIT             | 883           | JMID1C       | 4758         | ANO1        | 16576       |
| MED1         | -8231         | BRD7        | -5250           | TMF1      | -2311        | GRIA3           | 884           | MMP13        | 4759         | PHYKPL      | 16579       |
| GCA          | -8230         | YIPF5       | -5249           | CELF1     | -2310        | KCNIP3          | 885           | LYPD8        | 4760         | GJA9-MYCBP  | 16580       |
| CASK         | -8229         | TMEM198     | -5248           | RPRL1A    | -2309        | LOC10106060     | 886           | NCOA2        | 4761         | MOCOS       | 16582       |
| FAM155B      | -8227         | ECL1        | -5247           | LOC150776 | /// -2308    | TAOK1           | 887           | LINC01267    | 4763         | CACUL1      | 16586       |
| IPRL         | -8226         | MCD1        | -5246           | TM64      | -2307        | HSPB7           | 888           | LINC00474    | 4764         | LPF         | 16591       |
| CELF4        | -8225         | ZNF814      | -5245           | NDUFA7    | -2306        | HERC2           | /// HEI 889   | RP11-44F14.8 | 4765         | PCDH7       | 16593       |
| TECB3-AS1    | -8224         | MSI2        | -5244           | ZRANB2    | -2305        | PI16            | 890           | GPR182       | 4767         | SYNE1       | 16596       |
| SMAD5        | -8223         | EXOS        | -5243           | SGCB      | -2304        | HTRA            | 891           | NRG1         | 4769         | PSD4        | 16602       |
| CNOT4        | -8222         | DNLM        | -5242           | MEAF6     | -2303        | MKNK2           | 893           | AC012360.6   | 4770         | NDE1        | 16603       |
| OPA3         | -8221         | SZTAR       | -5241           | BSN       | -2302        | CYP4Z1          | 894           | LINC157860   | 4771         | GPR180      | 16605       |
| TDRD3        | -8220         | ZFANL6      | -5240           | TM64      | -2301        | HSPB7           | 897           | LOC10192705  | 4784         | RAD54L2     | 16607       |
| PTPOC1       | -8219         | PKS3C       | -5239           | NDUFS1    | -2300        | ZNF843          | 899           | RP1-68D18.4  | 4773         | MRO         | 16629       |
| ABC2         | -8218         | NUPL2       |                 |           |              |                 |               |              |              |             |             |

|               |       |               |       |               |       |               |       |               |       |              |       |       |       |
|---------------|-------|---------------|-------|---------------|-------|---------------|-------|---------------|-------|--------------|-------|-------|-------|
| MED25 /// MI  | -8182 | TRPM7         | -5200 | CLASP1        | -2264 | PLC82         | 947   | RPS-1039K5.3  | 4828  | HGF          | 16817 |       |       |
| SH3GL3        | -8180 | ADCK2         | -5199 | MRPL37        | -2263 | LINC01121     | 948   | RBPM5         | 4832  | KDM4C        | 16823 |       |       |
| FAM120A05     | -8179 | JADE1         | -5198 | CAND1         | -2262 | LRCH3         | 949   | PVRL1         | 4834  | MYO5A        | 16830 |       |       |
| TPAL          | -8178 | RBP5          | -5197 | HADH          | -2261 | ACTR3         | 950   | ABHD11        | 4835  | GP2          | 16832 |       |       |
| PEL3          | -8177 | H2AFY         | -5195 | GMFB          | -2260 | LOC388456     | 951   | SLC22A8       | 4836  | ABCC13       | 16834 |       |       |
| PHRF1         | -8176 | ARHGAP35      | -5194 | HMG81         | -2259 | PKN2          | 952   | ADAMTS9-AS    | 4837  | CTS8         | 16836 |       |       |
| PCID2         | -8175 | KIAA0101      | -5193 | ASB3 /// GPR  | -2258 | CAST          | 954   | RNA5E3        | 4838  | PTGER3       | 16837 |       |       |
| CHD1          | -8174 | SIPA111       | -5192 | SMARCA4       | -2257 | NED09         | 956   | TGDS          | 4839  | CD4          | 16838 |       |       |
| ATG5          | -8173 | AP301         | -5191 | TRIM13        | -2256 | METTL20       | 957   | LCLN1         | 4840  | ARPP21       | 16842 |       |       |
| FNTA          | -8172 | ADK           | -5190 | MPHOSPH10     | -2255 | LOC10192876   | 959   | A2M-AS1       | 4841  | CSNK1A1      | 16843 |       |       |
| RBM42         | -8171 | TMM22         | -5189 | NUP153        | -2254 | CDC117        | 960   | TBL1X         | 4842  | LETM1        | 16844 |       |       |
| ZNF318        | -8170 | KIZ           | -5188 | SALL2         | -2253 | ORSH1         | 961   | KCNJ1         | 4843  | CCDC150      | 16847 |       |       |
| THOC2         | -8169 | DACT1         | -5187 | EHF1C1        | -2252 | POM121L8P     | 962   | PLEKH02       | 4844  | EHMT2        | 16848 |       |       |
| SLC4A3        | -8168 | NKAP          | -5186 | PXMP2         | -2251 | CCDC144CP     | 963   | FMN1          | 4845  | F5           | 16850 |       |       |
| NTT           | -8166 | SERBP1        | -5185 | H2AFV         | -2250 | ACSS2         | 964   | HBB           | 4847  | GPR125       | 16853 |       |       |
| HAR3 /// LOC  | -8165 | AGBL5         | -5184 | AGBL5         | -2249 | APOR5         | 965   | HMMT          | 4849  | GRIK5        | 16856 |       |       |
| DAP3          | -8163 | PCAF1         | -5183 | HMC9          | -2248 | GLP1R         | 967   | GSTA1         | 4852  | CITA         | 16864 |       |       |
| ALKBH5        | -8162 | LOC10028936   | -5182 | LRRCA2        | -2247 | MGIL          | 968   | TEX11         | 4854  | NOS1         | 16871 |       |       |
| YPR4          | -8161 | RAB11B-AS1    | -5181 | BCLAF1        | -2246 | LOC10013366   | 969   | LINC00690     | 4855  | SCAMP5       | 16879 |       |       |
| SLC33A1       | -8160 | CSRN9         | -5180 | PSME4         | -2245 | PTGDR         | 970   | TAS2R3        | 4856  | NTRK2        | 16892 |       |       |
| DPH5          | -8159 | USP36         | -5179 | PSMD5-AS1     | -2244 | C11orf30      | 971   | NAALAD        | 4857  | PARVA        | 16895 |       |       |
| METTL3        | -8158 | ARCE1         | -5178 | NEURL4        | -2243 | MVP           | 976   | PARDD6G-AS1   | 4858  | ASB14        | 16896 |       |       |
| MAP2K5        | -8157 | PREPL         | -5177 | PREPL         | -2242 | REG1P         | 978   | ITGB3         | 4859  | TCF11L2      | 16898 |       |       |
| PKIB          | -8155 | KLHL9         | -5176 | FASTK02       | -2241 | EREG          | 979   | ADAM29 /// I  | 4860  | SLAMF1       | 16906 |       |       |
| PPP1R3        | -8154 | GPR98         | -5175 | KPNB1         | -2240 | SLC17A7       | 981   | BOC           | 4861  | MLLT6        | 16913 |       |       |
| LRRC34        | -8153 | CDKN2D        | -5174 | DCTN4         | -2239 | SMO           | 982   | LINC00423     | 4862  | ZFP3612      | 16920 |       |       |
| TMEM205       | -8152 | MED7          | -5173 | C6orf62       | -2238 | TMPRSS11E     | 984   | SLAMF9        | 4863  | TMEM151B     | 16921 |       |       |
| UBAP2         | -8151 | PPAG9         | -5172 | FOPNL         | -2237 | MFS07         | 985   | TRABD2B       | 4864  | KIF6         | 16927 |       |       |
| RIMKB         | -8150 | BOLA1         | -5171 | HELLS         | -2236 | MMP8          | 986   | SIGLEC10      | 4865  | RNAS57       | 16928 |       |       |
| UQCRC2        | -8149 | GOLGA2P5      | -5170 | YWHAE         | -2235 | LOC10050707   | 987   | HCG22         | 4866  | TMEM132A     | 16930 |       |       |
| DSTN          | -8148 | MTFR1L        | -5169 | CEBP6         | -2233 | LOC10099628   | 988   | VSTM4         | 4867  | STOM         | 16934 |       |       |
| TRNL1         | -8147 | RIMKB         | -5168 | LPIN2         | -2232 | CACNA1C       | 990   | MMAA          | 4868  | CEP57L1      | 16937 |       |       |
| ZNF791        | -8145 | KPNA1         | -5167 | TSSC1         | -2231 | CYP287P       | 991   | DUOXA1        | 4869  | SGTB         | 16940 |       |       |
| TFPT          | -8144 | PTRPA         | -5166 | ZNF416        | -2230 | ABLUM3        | 992   | MIR142        | 4870  | ADAM22       | 16953 |       |       |
| PTAR1         | -8143 | SNRPE         | -5165 | EFS3-AS1      | -2229 | TGOLN2        | 993   | TGFB2         | 4871  | NHSL1        | 16957 |       |       |
| NEK1          | -8142 | LDZAF1        | -5164 | GEMIN2        | -2228 | LOC10192712   | 995   | DGCR14 /// T  | 4872  | POMGN1       | 16958 |       |       |
| GCDF          | -8141 | MDH1B         | -5163 | ZNF689        | -2227 | LINC00152 /// | 996   | SP110         | 4874  | ARPP21       | 16978 |       |       |
| NADK2         | -8140 | GTPBP4 /// ID | -5162 | ZNF91         | -2226 | INTS4         | 997   | SLC25A30      | 4875  | DUSP4        | 16980 |       |       |
| AUTS2         | -8139 | PSMD13        | -5161 | BUB3          | -2225 | H1FN1         | 998   | SLCG6A        | 4876  | EMP1         | 16982 |       |       |
| TMEM27        | -8138 | RP1           | -5160 | CC73 /// LOC  | -2224 | PODGRA        | 999   | FLT3          | 4877  | H2AFZ        | 16984 |       |       |
| CHCHD1        | -8137 | MAD2          | -5159 | MPTAN1        | -2223 | LINC00056     | 1001  | LINC00056     | 4878  | SAMM50       | 16988 |       |       |
| CRIP1         | -8136 | AUTS2         | -5158 | MESDC2        | -2222 | SP7AN1        | 1003  | SP7AN1        | 4879  | SMPDL3B      | 16997 |       |       |
| TINF2         | -8135 | TMEM27        | -5157 | ZNF271        | -2221 | TP53I11       | 1004  | CTB-43E15.1   | 4882  | ATP11A-AS1   | 17003 |       |       |
| YWHAH         | -8134 | CHCHD1        | -5156 | COK7B         | -2220 | PADI1         | 1006  | LOC1027241E   | 4883  | PALMD        | 17005 |       |       |
| CDC36         | -8133 | HSPD1         | -5155 | RC3H2         | -2219 | AADAC         | 1008  | LOC1019289J   | 4884  | ZNF7         | 17006 |       |       |
| LOC10272496   | -8132 | STAU1         | -5154 | EF3B          | -2218 | GBG71         | 1009  | GPT           | 4885  | FCAR         | 17008 |       |       |
| HSPD1         | -8131 | ZDHHC21       | -5153 | EF3B          | -2218 | MUC8          | 1010  | NLGN2         | 4886  | 40787        | 17013 |       |       |
| STAU1         | -8130 | DDX20         | -5152 | FAM76A        | -2217 | FRS1B         | 1012  | ASCL1         | 4887  | RALGAP1      | 17020 |       |       |
| ZDHHC21       | -8129 | ALG13         | -5151 | PAAF1         | -2215 | RP11-521D12   | 1012  | CES1 /// LOC1 | 4889  | PTPRS        | 17024 |       |       |
| DDX20         | -8128 | C2orf43       | -5150 | CP5F2         | -2214 | CLASP2        | 1013  | FOXP2         | 4890  | VNN3         | 17030 |       |       |
| ALG13         | -8126 | LPH           | -5149 | HSD17B6       | -2213 | GPR144        | 1015  | TICRR         | 4893  | BAIAP2-AS1   | 17043 |       |       |
| C2orf43       | -8125 | UPAR2         | -5148 | PTTG3P        | -2212 | LOC10013482   | 1016  | PTPRB         | 4894  | PECAM1       | 17045 |       |       |
| LPH           | -8124 | MIRP39        | -5147 | ZKSCAN1       | -2211 | STXB2         | 1023  | PHOX2B        | 4895  | TMEM116      | 17050 |       |       |
| UPAR2         | -8123 | ATP11A        | -5146 | DHX40         | -2210 | LOC10192736   | 1022  | LOC10192736   | 4897  | LOC10192736  | 17050 |       |       |
| MIRP39        | -8122 | GSP11         | -5145 | CENPD01P1     | -2209 | ANHX          | 1019  | RG52          | 4898  | AMA3         | 17058 |       |       |
| C6orf40A      | -8121 | RAB11FIP4     | -5144 | GCF2C         | -2208 | LOC10050560   | 1020  | RASGRP3       | 4900  | LMF1         | 17070 |       |       |
| ALG13         | -8120 | ZNF655        | -5143 | ZNF430        | -2207 | LOC10193023   | 1021  | C15orf54      | 4901  | RARA         | 17072 |       |       |
| C2orf43       | -8125 | COM1D9        | -5142 | NASP          | -2206 | LOC10192736   | 1022  | IQSE2         | 4902  | ZNF324B      | 17083 |       |       |
| LPH           | -8124 | COM1D9        | -5142 | NASP          | -2206 | LOC10192736   | 1022  | IQSE2         | 4902  | ZNF324B      | 17083 |       |       |
| UPAR2         | -8123 | MIRP39        | -5141 | HILPDA        | -2205 | STXB2         | 1023  | PHOX2B        | 4895  | IFIT2        | 17091 |       |       |
| MIRP39        | -8122 | ZNF655        | -5140 | UTP23         | -2204 | LOC10192736   | 1022  | LOC10192736   | 4897  | IFIT2        | 17091 |       |       |
| ATP11A        | -8121 | GSP11         | -5139 | COPRS         | -2203 | CTB-31020.2   | -2203 | CTB-31020.2   | -2203 | DEFB107A /// | 4903  | MYO7B | 17100 |
| GSP11         | -8120 | RAB11FIP4     | -5138 | CDK2          | -2202 | LOC441666     | 1026  | MKL2          | 4906  | NCKIP5D      | 17102 |       |       |
| RAB11FIP4     | -8119 | ZNF655        | -5138 | GNPTAB        | -2201 | GNPTAB        | 1027  | MAP3K8        | 4907  | ASAH2B       | 17106 |       |       |
| ZNF655        | -8118 | COM1D9        | -5137 | AGO1          | -2200 | NR2           | 1031  | ITGB7         | 4909  | ATFPH        | 17107 |       |       |
| COM1D9        | -8117 | ASCC3         | -5136 | COD3          | -2199 | LOC10050617   | 1033  | CR936796      | 4910  | LLGL1        | 17108 |       |       |
| ASCC3         | -8116 | MAR1          | -5135 | RECP1         | -2198 | FLJ21408      | 1034  | C6orf60       | 4911  | TMEM17A      | 17113 |       |       |
| MAR1          | -8115 | SLC25A1A      | -5134 | ADAM22        | -2197 | PDLIM5        | 1035  | GGT1 /// GGT1 | 4913  | LINC00354    | 17115 |       |       |
| SLC25A1A      | -8114 | TMEM261       | -5133 | HNRNPUL2      | -2196 | AMHR2         | 1036  | ALDH3B2       | 4914  | METTL22      | 17117 |       |       |
| TMEM261       | -8113 | HPCAL1        | -5132 | SMG9          | -2195 | DCN           | 1038  | CKAP2         | 4915  | LZTS2        | 17120 |       |       |
| HPCAL1        | -8112 | NKAIN1        | -5131 | GABPB1        | -2194 | BC053951      | 1039  | LTA           | 4917  | GM2A         | 17125 |       |       |
| NKAIN1        | -8111 | PAPOLA        | -5129 | TSN           | -2193 | WRP1L         | 1041  | VIL1          | 4918  | CD44         | 17132 |       |       |
| PAPOLA        | -8109 | R02D11        | -5128 | PCX1          | -2192 | NR2           | 1042  | MIR10A        | 4920  | NCR2         | 17137 |       |       |
| R02D11        | -8108 | ZSCAN2        | -5127 | R3HDM1        | -2191 | PCDH1         | 1043  | PCDH1         | 4921  | CDC14B       | 17142 |       |       |
| ZSCAN2        | -8107 | SLC30A5       | -5126 | CTA-29F11.1   | -2190 | FLJ30064      | 1044  | LOC1010604E   | 4922  | SH3GLB2      | 17143 |       |       |
| SLC30A5       | -8106 | TWISTNB       | -5125 | PRKG2         | -2189 | LAD1          | 1045  | IPO11         | 4923  | EGFR         | 17145 |       |       |
| TWISTNB       | -8105 | NFATC3        | -5124 | USP49         | -2188 | FNDC4         | 1046  | LMAN1L        | 4926  | C11orf21     | 17157 |       |       |
| NFATC3        | -8104 | RPN1          | -5123 | PLK4          | -2187 | EVIS          | 1048  | ABCC5         | 4927  | SFT2D1       | 17159 |       |       |
| RPN1          | -8103 | SSTA          | -5122 | FAM149A       | -2186 | SPANXA1 /// I | 1049  | IMPAD1        | 4929  | IMPAD1       | 17161 |       |       |
| SSTA          | -8102 | YPR4          | -5121 | DTYMK         | -2185 | RASD1         | 1050  | LOC10099675   | 4931  | NCDN         | 17164 |       |       |
| YPR4          | -8101 | GG42          | -5120 | UBTDO         | -2184 | LPAL2         | 1051  | MAT1A         | 4932  | GATA1        | 17167 |       |       |
| GG42          | -8100 | FAM208B       | -8099 | PDE4D         | 1052  | IFITM1 /// IF | 4933  | IFITM1 /// IF | 4933  | CNTROB       | 17171 |       |       |
| FAM208B       | -8099 | SLC35B3       | -8098 | PGBD2         | 1053  | PLAC1         | 4934  | PLAC1         | 4934  | RP13-39P12.3 | 17172 |       |       |
| SLC35B3       | -8098 | CKMT1A /// C  | -8097 | JPH2          | 1055  | HLA-DRB1 ///  | 4935  | HLA-DRB1 ///  | 4935  | CYP4B1       | 17175 |       |       |
| CKMT1A /// C  | -8097 | SDE2          | -8096 | UNC00919      | 1056  | CDC42SE2      | 4936  | CDC42SE2      | 4936  | ATP6V1H      | 17180 |       |       |
| SDE2          | -8096 | AP3B2         | -8094 | LOC10272344   | 1057  | ITGB8         | 4937  | ITGB8         | 4937  | SEEL         | 17182 |       |       |
| AP3B2         | -8094 | C7orf25 /// P | -8093 | LRC4A         | 1058  | FAM166B       | 4938  | FAM166B       | 4938  | TPSANC1      | 17183 |       |       |
| C7orf25 /// P | -8093 | HMG83         | -8092 | ODF3L         | 1059  | LOC1019275E   | 4939  | LOC1019275E   | 4939  | PPAP2B       | 17191 |       |       |
| HMG83         | -8092 | INSIG1        | -8091 | ZNF280B       | 1062  | VMP1          | 4940  | VMP1          | 4940  | NPY2R        | 17193 |       |       |
| INSIG1        | -8091 | ZBTB41        | -8090 | C2orf27A      | 1063  | LINC01268     | 4941  | LINC01268     | 4941  | PITPN1       | 17202 |       |       |
| ZBTB41        | -8090 | CTBP1         | -8089 | SH3GL3        | 1065  | CD44          | 4942  | CD44          | 4942  | LOC400620    | 17207 |       |       |
| CTBP1         | -8089 | DKC1 /// MIR  | -8088 | TLR10         | 1066  | TRP51         | 4944  | TRP51         | 4944  | NCR2         | 17208 |       |       |
| DKC1 /// MIR  | -8088 | PPP1R26       | -8086 | IL37          | 1067  | ETV3          | 4945  | ETV3          | 4945  | LINC00226    | 17220 |       |       |
| PPP1R26       | -8086 | SLC35B4       | -8085 | PLA2R1        | 1068  | MCHR2         | 4946  | MCHR2         | 4946  | WRNP1        | 17224 |       |       |
| SLC35B4       | -8085 | BCL2L13       | -8084 | AC007364.1 /  | 1071  | RP11-55K13.3  | 4947  | RP11-55K13.3  | 4947  | RIMBP2       | 17235 |       |       |
| BCL2L13       | -8084 | GIA9 /// GIA9 | -8083 | CA13 /// LOC1 | 1073  | CCM2L         | 4948  | CCM2L         | 4948  | GEMIN7       | 17247 |       |       |
| GIA9 /// GIA9 | -8083 | CUK1          | -8082 | HLA-DOA       | 1074  | HLA-DOA       | 1074  | C6orf15       | 4949  | LAT2         | 17250 |       |       |
| CUK1          | -8082 | ARL9          | -8081 | ZFP1          | 1075  | ZFP1          | 1075  | LOC10192865   | 4950  | ILRL1        | 17254 |       |       |
| ARL9          | -8081 | RUFY2         | -8080 | LOC10192736   | -5102 | NOP58         | -2166 | LOC728040     | 1079  | FGF5         | 4951  |       |       |
| RUFY2         | -8080 | TRAP1         | -8079 | IPO9          | -5101 | ZBTB10        | -2165 | ABHD4         | 1080  | ILRL1        | 4952  |       |       |
| TRAP1         | -8079 | BAIAP2L1      | -8078 | PLS1          | -5100 | RNMD5A        | -2164 | EEDP1         | 1082  | LOC10192841  | 4954  |       |       |
| BAIAP2L1      | -8078 | MORF4L1       | -8077 | DCAF13        | -5099 | ZNF135        | -2163 | C15orf52      | 1084  | KLRD1        | 4955  |       |       |
| MORF4L1       | -8077 | MIR304 /// I  | -8075 | KIF1B         | -5098 | SF3B1         | -2162 | AC004538.3 /  | 1085  | MASP1        | 4956  |       |       |
| MIR304 /// I  | -8075 | NPEP5         | -8074 | MTO1          | -5097 | MFS09         | -2161 | STAR05        | 1086  | GLIS3        | 4957  |       |       |
| NPEP5         | -8074 | BAHD1         | -8073 | OLFM1         | -5096 | BM2           | 1088  | FAM205A ///   | 4959  | FAM205A ///  | 4959  |       |       |
| BAHD1         | -8073 | GT2H2 /// G   | -8072 | MCPH1         | -5094 | EXOC6         | -2158 | FMO4          | 1089  | DG592442     | 4961  |       |       |
| GT2H2 /// G   | -8072 | INPP5K        | -8071 | SKA1          | -5093 | CAD           | -2157 | GABRR2        | 1090  | MAGEB3       | 4963  |       |       |
| INPP5K        | -8071 | KIAA0753      | -8070 | KRT19         | -5092 | ZNF439        | -2156 | ACTR3BP2      | 1091  | RP11-493L12  | 4964  |       |       |
| KIAA0753      | -8070 | EFCAB12       | -8069 | KCTD13        | -5091 | TMD23         | -2155 | SPANXA1 /// I | 1092  |              |       |       |       |

|              |       |              |         |               |       |               |          |              |      |              |       |
|--------------|-------|--------------|---------|---------------|-------|---------------|----------|--------------|------|--------------|-------|
| MCUR1        | -8056 | MALSU1       | -5077   | RNF111        | -2142 | LOC284454 //  | 1109     | CLP          | 4981 | IGF1         | 17333 |
| SLC37A1      | -8055 | HMGNC        | -5076   | STRBP         | -2141 | HERC2P7       | 1110     | TMEM174      | 4982 | LN37         | 17340 |
| EF2AK1       | -8054 | GRIN2C       | -5075   | PPIG          | -2140 | ADCY4         | 1111     | UNC101012    | 4984 | SREK1        | 17342 |
| ZC3H10       | -8053 | NDFY53       | /// P1- | FAC1          | -2139 | UTS2B         | 1112     | G6PC2        | 4986 | ITSDC2       | 17345 |
| LARP1B       | -8052 | KIAA1958     | -5073   | ZNF548        | -2138 | MIR22 // Mir  | 1114     | IL16         | 4988 | ESR1         | 17346 |
| HDAC3        | -8051 | CAND1        | -5072   | SNRPC         | -2137 | COMT          | 1116     | TNFRSF10B    | 4989 | LANCL1       | 17348 |
| ROGDI        | -8050 | PUS7         | -5071   | FBXW2         | -2136 | GAST          | 1117     | NR1H4        | 4990 | OSGIN2       | 17351 |
| UBBP1 // UB  | -8049 | GLT1D1       | -5070   | TEFM          | -2135 | NEXN          | 1118     | TRAP         | 4991 | NAAL5        | 17352 |
| TAS2R14      | -8048 | HARS2        | -5069   | TMM21         | -2134 | TAA9          | 1119     | PTGER3       | 4993 | CAMK2B       | 17358 |
| NCLDIP2      | -8047 | NDFY53       | -5068   | SLC21A3       | -2133 | SLC21A3       | /// 1120 | SLC34A2      | 4994 | LOC1013011   | 17365 |
| BENND5B      | -8046 | SLC35C2      | -5067   | BHLHE40       | -2132 | CH24          | 1122     | LMD1         | 4995 | GNAO1        | 17366 |
| KPNA3        | -8045 | POU4F1       | -5066   | DT01          | -2131 | FAM201B //    | 1123     | LOC220077    | 4996 | LEPR // LEPR | 17367 |
| INO80E       | -8044 | CECR2        | -5065   | SCOC          | -2130 | C4orf17       | 1124     | PPP9         | 5000 | HRASL52      | 17368 |
| SOX6         | -8043 | USP12        | -5064   | CACYPB        | -2129 | EDA2R         | 1125     | DOCK1        | 5001 | DNAH1        | 17369 |
| PRR1M        | -8042 | USMG65       | -5063   | RPS29         | -2128 | SSH3          | 1127     | THRB-IT1 //  | 5002 | KIDINS220    | 17376 |
| FXL3         | -8041 | FBXW2        | -5062   | NLK           | -2127 | LOC10050645   | 1128     | ADIPQ1       | 5003 | COL27A1      | 17377 |
| RP11-199F11  | -8040 | LARS         | -5061   | FKBP1         | -2126 | PITPNLC1      | 1130     | TRA@ // YM   | 5005 | UBR2         | 17382 |
| KRBOA        | -8039 | PRPF31       | -5060   | TCF3          | -2125 | ABCBA         | 1131     | PKFKB2       | 5007 | LOC642236    | 17387 |
| ARIH1        | -8038 | SFA2         | -5059   | SRSF3         | -2124 | SYCP1         | 1132     | LOC57399     | 5008 | EFCAB6       | 17390 |
| LOC10050654  | -8036 | KHDRBS1      | -5058   | RTN3          | -2123 | LOC286009     | 1133     | PIIRA        | 5009 | MAP7D3       | 17407 |
| FUZ          | -8035 | CDC125       | -5057   | MAGED4 // I-  | -2122 | SLC25A16      | 1135     | KYNU         | 5010 | LOC10192903  | 17410 |
| TMT2C        | -8033 | FAM71E1      | -5056   | SUZ12 // SU-  | -2121 | UNC00459 //   | 1136     | GIP          | 5013 | PARP11       | 17411 |
| PPP1CC       | -8032 | CTP7F3 // LC | -5055   | AARS2 // P-   | -2119 | TLOC1         | 1137     | MMP21        | 5014 | GPR115       | 17416 |
| ANKHD1 // A  | -8031 | MFF          | -5054   | RPS6KA5       | -2118 | PTGES         | 1138     | C16orf82     | 5017 | OGFOD1       | 17428 |
| MCM8         | -8030 | FAM103A1     | -5053   | RSF1          | -2117 | PDE7A         | 1140     | HFE          | 5018 | PTPRD        | 17429 |
| TRMT5        | -8029 | CEP72        | -5052   | RAD17         | -2116 | IL17RC        | 1141     | SH3RF2       | 5019 | ZBTB37       | 17433 |
| UNC00115     | -8028 | SELT         | -5051   | EDRF1         | -2115 | ELL2          | 1142     | SLC1A3       | 5020 | APOBEC3G     | 17434 |
| LYAR         | -8027 | CHKA         | -5050   | SAP18         | -2114 | CFAR // LOC   | 1143     | DSC1         | 5022 | ZNF688       | 17442 |
| FAM160A2     | -8026 | TSG101       | -5049   | PPRKC         | -2113 | IL1A          | 1145     | LRRC43       | 5023 | BEND7        | 17464 |
| ZNF2         | -8025 | NR2F2        | -5048   | NUF53         | -2112 | LOC10050686   | 1146     | RG513        | 5024 | LYNX1        | 17476 |
| GMDS         | -8024 | NRF1         | -5047   | NAA25         | -2110 | MIPOL1        | 1150     | TBX6         | 5025 | MMP14        | 17496 |
| TOMM5        | -8023 | ATP5L        | -5046   | PTBP2         | -2109 | CDC14A        | 1151     | AC013733.4   | 5026 | SOX17        | 17508 |
| NRGN         | -8022 | MYCL         | -5045   | MIR4745 // I- | -2108 | SPATA16       | 1152     | C19orf47     | 5027 | KIR2D51      | 17512 |
| AKR7A3       | -8021 | EBP          | -5044   | VEZT          | -2107 | LSMBT11       | 1153     | GRP101       | 5028 | EHF          | 17515 |
| BCR          | -8020 | CXK16        | -5043   | CDM2          | -2106 | FND3B // LC   | 1154     | PSG9         | 5030 | ASMTL-AS1    | 17525 |
| BAX          | -8019 | PP5C5        | -5042   | BUB3          | -2105 | CLDN8         | 1155     | CR936796     | 5031 | RBM52        | 17541 |
| RIC8B        | -8018 | KIDINS220    | -5041   | DDP10         | -2104 | MSR8          | 1158     | ZDHHC1       | 5032 | TM4SF1       | 17555 |
| MAF1         | -8017 | ING4         | -5040   | DNM1L         | -2103 | NR4A1         | 1160     | RBM17        | 5033 | BRD4         | 17573 |
| ARIH2OS      | -8016 | BNIP1        | -5039   | PAK1P1        | -2102 | CASP10        | 1161     | RABEP2       | 5034 | ENO1         | 17578 |
| CWF19L2      | -8015 | NREP         | -5038   | M2T2A // M-   | -2101 | AD02          | 1163     | MSL1         | 5036 | POLR2F       | 17586 |
| RAD50        | -8014 | CASQ1        | -5037   | CAQ1          | -2100 | PAR3B         | 1164     | PAR3B        | 5037 | TRIM4        | 17587 |
| ALDH7A1      | -8013 | UBA5         | -5036   | TFPZ2         | -2099 | BP1FA3        | 1165     | C14orf183    | 5038 | RA11         | 17589 |
| SMCR8        | -8012 | ZNF79        | -5035   | PSMD3         | -2098 | DKA4          | 1166     | KIF13A       | 5039 | TARP         | 17590 |
| GTPBP1 // I  | -8011 | SSBP2        | -5034   | ZNF416        | -2097 | MAN1A1        | 1168     | LOC10192877  | 5040 | SMCHD1       | 17592 |
| ZNF765       | -8010 | ASB1         | -5033   | CNPY3         | -2096 | CAMK1G        | 1169     | AKO21804     | 5041 | KIF6         | 17596 |
| TAF3         | -8009 | CADM4        | -5032   | ZSWIM7        | -2095 | TRIM10        | 1170     | MSD2         | 5042 | DRP4         | 17600 |
| SARS         | -8007 | SCN3A        | -5031   | RNP18         | -2094 | TM7C          | 1171     | USF32 // US  | 5043 | CLC1         | 17604 |
| RNP1T        | -8006 | SMARCC2      | -5030   | ZNF664        | -2093 | KLK10         | 1172     | ITPKC        | 5044 | LOC389834    | 17610 |
| ZNF571       | -8005 | DAGLA        | -5029   | CHST9         | -2092 | CASP4         | 1174     | ZNF24        | 5045 | WDR19        | 17611 |
| RP11-452L6.1 | -8004 | DHX33        | -5028   | FZD3          | -2091 | TNR           | 1175     | LOC10192847  | 5047 | GYP4         | 17620 |
| UQCRI0       | -8003 | POU3F3       | -5027   | DDX39A        | -2090 | CEP41         | 1176     | RP11-764E7.1 | 5048 | SP2          | 17622 |
| SSBP3        | -8002 | UBE2J2       | -5026   | UTP18         | -2089 | GAS7          | 1177     | IL1R1        | 5049 | CHCHD5       | 17629 |
| USP46        | -8001 | ECHDC1       | -5025   | PPME1         | -2088 | AGPAT9        | 1179     | ABC2G        | 5050 | PROX214      | 17635 |
| DNAK16       | -7999 | FKBP45       | -5024   | IRX2          | -2087 | BRP1          | 1180     | PFGB         | 5051 | KIF16B       | 17642 |
| SPAT5        | -7998 | SETD81       | -5023   | ESPL1         | -2086 | ERAP1         | 1182     | TNFRSF10A    | 5052 | TCF3         | 17646 |
| AG04         | -7997 | ATP2A2       | -5022   | IQCB1         | -2085 | PAPS52        | 1183     | IGSF10       | 5053 | RASSF4       | 17652 |
| SNRNP200     | -7996 | GFMB1        | -5021   | APAE1         | -2084 | ADCY2         | 1184     | TFCP2L1      | 5054 | SZRD1        | 17653 |
| H0X47        | -7995 | RAM11FP4     | -5020   | MDI9          | -2083 | SLC15A2       | 1185     | LOC10192955  | 5056 | SLC15A1      | 17655 |
| TADA2A       | -7994 | UNC00667     | -5019   | MAPKAPK5-A    | -2082 | PAR5          | 1186     | LOC10192784  | 5057 | APTR         | 17659 |
| RNP2C        | -7993 | VPS33        | -5018   | CDM2          | -2106 | LOC10192881   | 1187     | LOC10050646  | 5058 | ARID1B       | 17669 |
| ZSCAN30      | -7992 | HNRNP1L      | -5017   | C9orf78       | -2080 | UNC00265 //   | 1188     | FRMD4B       | 5059 | NAMPT        | 17673 |
| PSMA7        | -7991 | MDN1         | -5016   | DDX46         | -2079 | POUSF18       | 1189     | SSX3         | 5060 | GRP27        | 17682 |
| AKAP8L       | -7990 | EMC7         | -5015   | TME08         | -2078 | ZNF396        | 1190     | FOXK1        | 5061 | BCL2L14      | 17686 |
| UNG3         | -7989 | DRP1         | -5014   | TRAPP1C3      | -2077 | S100A10       | 1191     | LOC10027184  | 5062 | SEC63        | 17688 |
| ZNF101       | -7988 | LPHN4        | -5013   | WDR5B         | -2076 | DYNLL2        | 1192     | LOC286370    | 5064 | VPS45        | 17691 |
| C7orf26      | -7987 | G5orf3 // G- | -5012   | RHEB1         | -2075 | ANOR908BP3    | 1193     | PHN11        | 5066 | TRAF2        | 17694 |
| PFN1         | -7985 | NRXN3        | -5011   | IREB2         | -2074 | DOHH          | 1194     | GFRA4        | 5067 | LSMEM1       | 17699 |
| CUL4B        | -7984 | TTCL14       | -5010   | THAP10        | -2073 | SLC7A8        | 1196     | LINC00837    | 5068 | LVPD4        | 17702 |
| ERGIC2       | -7983 | MIAT         | -5009   | C11orf31      | -2072 | TNP2          | 1197     | VNN1         | 5069 | CFTR         | 17709 |
| C7orf49      | -7982 | WARS2        | -5008   | TUC1          | -2071 | FLJ25694 // I | 1198     | TNFSF8       | 5070 | GLS          | 17713 |
| AKR1N2       | -7981 | ZK1          | -5007   | G2E3          | -2070 | RTN           | 1200     | PTGFR        | 5072 | CLMN         | 17721 |
| LSTN2        | -7980 | MRE5         | -5006   | HRS           | -2069 | HTRA2         | 1201     | MCP1         | 5073 | PTPS1        | 17724 |
| PPP4R2       | -7979 | ESCO1        | -5005   | RAD23B        | -2068 | STXP8-AS1     | 1204     | SFRP4        | 5074 | TRAP1        | 17727 |
| AC006026.13  | -7978 | HESE         | -5004   | MKI67         | -2067 | HGF           | 1206     | CDS3         | 5075 | DEFB19       | 17732 |
| ZNF346       | -7977 | MURC         | -5003   | USP14         | -2066 | NPAT          | 1208     | LOC400620    | 5076 | TFB2M        | 17739 |
| SLC14A       | -7976 | IFT80        | -5002   | PHF3          | -2065 | SCARAS        | 1209     | DSC3         | 5077 | CLDN18       | 17740 |
| YIPF5        | -7975 | ID4          | -5001   | TUBB          | -2064 | NR6A1         | 1210     | LOC10193007  | 5078 | ARHGFE12     | 17742 |
| MED14        | -7974 | ZNF554       | -4999   | PANPBP        | -2063 | PTGFS         | 1211     | SLC22A2      | 5080 | SLC1A3       | 17745 |
| PTX2         | -7973 | EF443        | -4998   | ZNF431        | -2062 | C1orf36       | 1213     | CEB2E        | 5081 | POE1C        | 17750 |
| H2AFX        | -7972 | CHM          | -4997   | RS1D1         | -2061 | ARHGFE28      | 1214     | UBE2W        | 5083 | GABPA        | 17752 |
| DAPK3 // MI  | -7971 | THUMP03      | -4996   | RPS6KA5       | -2060 | ATXN1         | 1215     | CAMKK2       | 5084 | GF5          | 17753 |
| RUNX1T1      | -7970 | TM2D1        | -4995   | SOX2          | -2059 | ARRDC2        | 1216     | NUB1         | 5085 | ZNF704       | 17755 |
| SFY2         | -7969 | HSPBP1       | -4994   | LINC01355     | -2058 | KLK15         | 1217     | SORDL        | 5086 | EPHA3        | 17756 |
| PPA2         | -7968 | PHF3         | -4993   | BRD1          | -2057 | KIAA1671      | 1219     | KRTAP4-6 //  | 5088 | BUB3         | 17758 |
| CHD4         | -7967 | ISCA1        | -4992   | PRKCB         | -2056 | LINC01222     | 1220     | CD84         | 5089 | TRAF3        | 17760 |
| SLC39A9      | -7966 | SATB1        | -4991   | ZNF529        | -2055 | CALM1 // CA   | 1221     | MEG3         | 5091 | BRPF3        | 17763 |
| BRC3         | -7965 | PICL2        | -4990   | KIAA2013      | -2054 | PDE5A         | 1223     | MAGEA8       | 5092 | LOC10192862  | 17764 |
| CNIH4        | -7964 | SLC17A6      | -4989   | UNC80         | -2053 | CAPN13        | 1224     | MAN2C1       | 5093 | CEP70        | 17768 |
| ARL10        | -7963 | MCYM9        | -4988   | SMIM11        | -2052 | CE53          | 1225     | CARS         | 5095 | SMAD4        | 17771 |
| RAB56        | -7962 | NDUF8B       | -4987   | PPP1R3E       | -2051 | KIAA2018      | 1226     | TFEB         | 5096 | PCDH7        | 17772 |
| DCNTE        | -7961 | BTX2 // GTF- | -4986   | WDR5          | -2050 | AOS5458       | 1229     | KIBRA1       | 5100 | TRAF2A       | 17775 |
| CLorf53      | -7960 | EBAG9        | -4985   | ICE1          | -2049 | SMAD5-AS1     | 1230     | CYP4B1       | 5101 | GKS          | 17784 |
| ITFG1        | -7959 | CNHN         | -4984   | BSYL          | -2047 | LOC10013045   | 1231     | TACR3        | 5103 | SRPK2        | 17794 |
| GSKIP        | -7958 | NHP2L1       | -4983   | WDR73         | -2046 | GSN           | 1232     | THAP6        | 5104 | CDH6         | 17796 |
| DEC11C       | -7957 | MRAP2        | -4982   | LINC00938     | -2045 | CLU1          | 1233     | TRABD        | 5105 | LOC10050645  | 17797 |
| DPY19L3      | -7956 | ATP51        | -4981   | KIF26A        | -2044 | TLL1          | 1234     | SLCGM4       | 5106 | APOP11       | 17803 |
| UTX          | -7955 | PKNA         | -4980   | TRAF4         | -2043 | TF11          | 1235     | CTHOS        | 5109 | SKL5         | 17824 |
| LRP2BP       | -7954 | SCN3B        | -4979   | CD320         | -2042 | FRRS1L        | 1237     | SNCA         | 5110 | PPARA        | 17807 |
| NELFCD       | -7953 | SMAD5        | -4978   | POLR3K        | -2041 | ERN1          | 1239     | BC034416     | 5111 | DCAF8        | 17810 |
| NPAT         | -7952 | ULBP1        | -4977   | DTL           | -2040 | LOC389834     | 1241     | RSPH3        | 5112 | KMT2A        | 17811 |
| EFCAB11      | -7951 | RBBP4        | -4976   | CHUK          | -2039 | ATP2A2        | 1242     | LINC01106 // | 5113 | SIK2         | 17818 |
| MRF5P3       | -7950 | KAT7         | -4975   | PFAS          | -2038 | GTSF1L        | 1244     | ACLS5        | 5114 | PABP1        | 17822 |
| PPP5CB       | -7949 | NCAN         | -4973   | PCSK9         | -2037 | ATRNLL        | 1247     | CCO85B       | 5115 | TRAF2        | 17824 |
| TMT2C        | -7948 | PCDH82       | -4972   | CHRNA3        | -2036 | MARK2         | 1248     | OTOP2        | 5116 | OTOP2        | 17825 |
| MBD1         | -7947 | BARD1        | -4971   | NFYA          | -2035 | CT45A1 // CT  | 1249     | PKFKB1       | 5118 | BGALT6       | 17838 |
| TOX2         | -7946 | FAM210A      | -4970   | PEX1          | -2034 | LOC10193015   | 1251     | LOC10050665  | 5119 | HDACS        | 17839 |
| BRAP         | -7945 | C18orf21     | -4969   | GRP27         | -2033 | RFPL3         | 1253     | PAPLN        | 5122 | XPNPEP2      | 17842 |
| SEC11C       | -7944 | ATF6B        | -4968   | LYPD6         | -2032 | MME           | 1254     | SAMD9L       | 5124 | RBP9         | 17847 |
| LINC00867    | -7943 | MIR14        | -4967   | RFBP1         | -2031 | TNS1          | 1255     | FGFBP1       | 5125 | DST          | 17852 |
| KIAA0141     | -7942 | ZFP90        | -4966   | SOCS7         | -2030 | AF086219 //   | 1256     | KIF1B        | 5126 | UBE3C        | 17    |
