# Supplementary material for: Gene expression profile identifies distinct molecular subtypes and potential therapeutic genes in Merkel cell carcinoma
Source: PubMed Central journal article supplement — Transl Oncol. 2020 Aug 6;13(11):100816. doi: 10.1016/j.tranon.2020.100816 (PMC7412862; doi:10.1016/j.tranon.2020.100816), 2020-08-06
Supplement: mmc3.pdf [file mmc3.pdf]

**Table 3. Biological process enriched in each subtypes of MCC**

**Enriched GO BP terms by genes over-expressed in Subtype I MCC**

| Category   | Term                                                  | Count | %        | PValue   | Genes                                  | List Total | Pop Hits | Pop Total   | Fold Enrichment | Bonferroni | Benjamini | FDR |
|------------|-------------------------------------------------------|-------|----------|----------|----------------------------------------|------------|----------|-------------|-----------------|------------|-----------|-----|
| GOTERM_BP_ | GO:0006260-DNA replication                            | 43    | 5.064782 | 1.14E-22 | INGS, DBF4, TIPIN, KIAA0101, CHEK: 715 | 155        | 16792    | 6.515280848 | 2.27E-19        | 2.27E-19   | 1.96E-19  |     |
| GOTERM_BP_ | GO:0000398-mRNA splicing, via spliceosome             | 46    | 5.418139 | 9.41E-19 | SRSF1, PRPF4B, LSM8, CNRKL1, SRSI 715  | 222        | 16792    | 4.866326466 | 1.87E-15        | 9.37E-16   | 1.62E-15  |     |
| GOTERM_BP_ | GO:0051301-cell division                              | 56    | 6.595995 | 2.31E-17 | CCNT2, CDK19, AURKA, ANKLE2, CCI 715   | 250        | 16792    | 3.75765035  | 4.61E-14        | 1.54E-14   | 3.98E-14  |     |
| GOTERM_BP_ | GO:0000082-G1/S transition of mitotic cell cycle      | 27    | 3.180212 | 8.38E-14 | DBF4, MCM10, PPAT, CCNE2, PRIM1 715    | 102        | 16792    | 6.216700946 | 1.67E-10        | 4.17E-11   | 1.44E-10  |     |
| GOTERM_BP_ | GO:0007062-sister chromatid cohesion                  | 26    | 3.062426 | 8.40E-13 | RAD51C, KIF22, NUP810, SPC25, SEI 715  | 103        | 16792    | 5.928331862 | 1.67E-10        | 3.34E-10   | 1.44E-09  |     |
| GOTERM_BP_ | GO:0006270-DNA replication initiation                 | 15    | 1.766784 | 1.29E-11 | CDCT, CDC6, TOPBP1, MCM2, CCM2 715     | 32         | 16792    | 11.00874126 | 2.57E-08        | 4.28E-09   | 2.22E-08  |     |
| GOTERM_BP_ | GO:0006351-transcription, DNA-templated               | 144   | 16.96113 | 2.79E-11 | XRCC5, ARNT2, NAA15, CBX3, CBX7 715    | 1955       | 16792    | 1.729864611 | 5.55E-08        | 7.93E-09   | 4.79E-08  |     |
| GOTERM_BP_ | GO:0006355-regulation of transcription, DNA-templated | 119   | 14.01649 | 3.03E-11 | ARNT2, ZNF253, CNOT6, ZNF829, K1 715   | 1504       | 16792    | 1.858213064 | 6.02E-08        | 7.53E-09   | 5.20E-08  |     |
| GOTERM_BP_ | GO:0000722-telomere maintenance via recomb            | 11    | 1.648999 | 2.19E-10 | RAD51C, SMC5, RAD51, PRIM1, POL 715    | 32         | 16792    | 10.27482517 | 4.36E-07        | 4.85E-08   | 3.77E-07  |     |
| GOTERM_BP_ | GO:00007067-mitotic nuclear division                  | 36    | 4.240283 | 4.14E-10 | KIF22, HAUS6, HAUS5, HAUS1, TIPIN 715  | 248        | 16792    | 3.409158583 | 8.24E-07        | 8.24E-08   | 7.11E-07  |     |
| GOTERM_BP_ | GO:0006281-DNA repair                                 | 34    | 4.004711 | 1.51E-09 | KIF22, RAD51C, ERCC6L2, UNG, CHE 715   | 235        | 16792    | 3.397875316 | 3.00E-06        | 2.73E-07   | 2.59E-06  |     |
| GOTERM_BP_ | GO:1901796-regulation of signal transduction b        | 24    | 2.826855 | 2.16E-09 | EXO1, INGS, SSRP1, CDK5R1, TAF5, 715   | 124        | 16792    | 4.545544778 | 4.30E-06        | 3.58E-07   | 3.71E-06  |     |
| GOTERM_BP_ | GO:0016925-protein sumoylation                        | 22    | 2.591284 | 1.98E-08 | KIAA1586, NUP160, TRIM28, SMC5, 715    | 117        | 16792    | 4.416042078 | 3.94E-05        | 3.03E-06   | 3.40E-05  |     |
| GOTERM_BP_ | GO:0000731-DNA synthesis involved in DNA rep          | 12    | 1.413428 | 1.25E-07 | EXO1, POLD3, RAD51C, RFC3, RAD5: 715   | 35         | 16792    | 8.052107892 | 2.48E-04        | 1.77E-05   | 2.14E-04  |     |
| GOTERM_BP_ | GO:0006369-termination of RNA polymerase II           | 15    | 1.766784 | 3.69E-07 | SRSF1, CSTF3, UZF2F, ALYREF, SRSF: 715 | 64         | 16792    | 5.504370629 | 7.35E-04        | 4.90E-05   | 6.35E-04  |     |
| GOTERM_BP_ | GO:0006406-mRNA export from nucleus                   | 18    | 2.120141 | 9.80E-07 | ENY2, SRSF1, SRSF10, NUP160, UZA 715   | 100        | 16792    | 4.227356643 | 0.0019495       | 1.22E-04   | 0.001684  |     |
| GOTERM_BP_ | GO:0000086-G2/M transition of mitotic cell cyc        | 20    | 2.355713 | 5.46E-06 | KHDRBS1, HAUS6, HAUS5, CCP110, I 715   | 137        | 16792    | 3.428513093 | 0.018051        | 6.39E-04   | 0.009376  |     |
| GOTERM_BP_ | GO:0042276-error-prone translation synthesis          | 8     | 0.942285 | 7.86E-06 | RFC5, RPA2, RFC3, RFC4, POLE2, RFC 715 | 19         | 16792    | 9.888555552 | 0.0155178       | 8.68E-04   | 0.013497  |     |
| GOTERM_BP_ | GO:0000732-strand displacement                        | 9     | 1.060071 | 8.12E-06 | EXO1, RAD51C, USP91, BRIP1, R 715      | 26         | 16792    | 8.129532006 | 0.0160321       | 8.50E-04   | 0.013948  |     |
| GOTERM_BP_ | GO:0034080-CENP-A-containing nucleosome as:           | 11    | 1.295642 | 9.72E-06 | CENPO, CENPL, RSF1, CENPA, HJURP 715   | 43         | 16792    | 6.007871199 | 0.0191712       | 9.67E-04   | 0.016706  |     |
| GOTERM_BP_ | GO:0000730-chromosome segregation                     | 13    | 1.531213 | 2.60E-05 | DSN1, NUF2, NDC80, BRCA1, SPC25 715    | 68         | 16792    | 4.489839572 | 0.0503996       | 0.00246    | 0.046424  |     |
| GOTERM_BP_ | GO:0008380-RNA splicing                               | 21    | 2.473498 | 2.63E-05 | RBFOX1, SNRPA3, PRPF4B, RBM4, SI 715   | 166        | 16792    | 2.971033785 | 0.0509899       | 0.002376   | 0.04516   |     |
| GOTERM_BP_ | GO:0000287-regulation of transcription involv         | 8     | 0.942285 | 3.29E-05 | CDC1, TYMS, CDC45, DHFR, PCNA, N 715   | 23         | 16792    | 8.168805108 | 0.0634559       | 0.002864   | 0.056567  |     |
| GOTERM_BP_ | GO:0006297-nucleotide-excision repair, DNA g          | 8     | 0.942285 | 4.48E-05 | RFC5, POLD3, RPA2, RFC3, RFC4, RFI 715 | 24         | 16792    | 7.828438228 | 0.0853144       | 0.003709   | 0.076936  |     |
| GOTERM_BP_ | GO:0006396-RNA processing                             | 15    | 1.766784 | 5.90E-05 | CSTF3, HERR, EXOSC9, CNRKL1, UZ 715    | 97         | 16792    | 3.631749694 | 0.1108624       | 0.004689   | 0.101365  |     |
| GOTERM_BP_ | GO:0006283-transcription-coupled nucleotide-e         | 13    | 1.531213 | 6.20E-05 | RFC5, POLD3, USP7, RPA2, RFC3, RF 715  | 74         | 16792    | 4.125798526 | 0.1161191       | 0.004736   | 0.064777  |     |
| GOTERM_BP_ | GO:0000245-spliceosomal complex assembly              | 8     | 0.942285 | 7.90E-05 | CNRKL1, USPP9, SNRNP1, SART3, SN 715   | 26         | 16792    | 7.226250672 | 0.1455939       | 0.005811   | 0.135714  |     |
| GOTERM_BP_ | GO:0008334-histone mRNA metabolic process             | 6     | 0.706714 | 8.46E-05 | ZNF473, LSM11, SSB, SNRPF, SNRP 715    | 12         | 16792    | 11.74265734 | 0.1549918       | 0.005997   | 0.145247  |     |
| GOTERM_BP_ | GO:1900264-positive regulation of DNA-direct          | 5     | 0.588928 | 1.02E-04 | RFC5, RFC3, RFC4, RFC2, DSCC1 715      | 7          | 16792    | 16.77522478 | 0.1843976       | 0.007004   | 0.175768  |     |
| GOTERM_BP_ | GO:0042769-DNA damage response, detection i           | 9     | 1.060071 | 1.08E-04 | RFC5, POLD3, MRPS26, RPA2, RFC3, 715   | 36         | 16792    | 5.871328671 | 0.1932486       | 0.007132   | 0.185168  |     |
| GOTERM_BP_ | GO:0019985-translesion synthesis                      | 9     | 1.060071 | 1.08E-04 | RFC5, POLD3, RPA2, RFC3, RFC4, RFI 715 | 36         | 16792    | 5.871328671 | 0.1932486       | 0.007132   | 0.185168  |     |
| GOTERM_BP_ | GO:0000287-spliceosomal snRNP assembly                | 8     | 0.942285 | 1.32E-04 | CLNS1A, SNRNP1, SART3, SNRPF, SN 715   | 28         | 16792    | 6.71008991  | 0.2312391       | 0.008447   | 0.226714  |     |
| GOTERM_BP_ | GO:0031124-mRNA 3'-end processing                     | 10    | 1.177856 | 2.26E-04 | SRSF3, SRSF1, SARNP, CSTF3, UZF2 715   | 50         | 16792    | 4.697062937 | 0.3624559       | 0.013968   | 0.387756  |     |
| GOTERM_BP_ | GO:0007076-mitotic chromosome condensati              | 6     | 0.706714 | 2.88E-04 | NCAPH, NCAPG, CDC45, SMC2, NCA 715     | 15         | 16792    | 9.394125874 | 0.4367566       | 0.017245   | 0.494227  |     |
| GOTERM_BP_ | GO:0006271-DNA strand elongation involved i           | 6     | 0.706714 | 2.88E-04 | POLD3, PRIMP1, RFC3, RFC4, POLD1, 715  | 15         | 16792    | 9.394125874 | 0.4367566       | 0.017245   | 0.494227  |     |
| GOTERM_BP_ | GO:0045892-negative regulation of transcription       | 39    | 4.59364  | 3.85E-04 | XRCC5, CDK5R1, HMG82, ELF2, RSYF1 715  | 499        | 16792    | 1.835525597 | 0.5366424       | 0.022309   | 0.659891  |     |
| GOTERM_BP_ | GO:0007049-cell cycle                                 | 22    | 2.591284 | 3.91E-04 | CCNT2, LINS2, GMNN, SNRP, DTYM1 715    | 217        | 16792    | 2.380999664 | 0.5413658       | 0.022025   | 0.670524  |     |
| GOTERM_BP_ | GO:0051297-centrosome organization                    | 8     | 0.942285 | 3.96E-04 | HAUS6, HAUS5, CEP120, CNAPS, HAI 715   | 33         | 16792    | 5.693409621 | 0.5455137       | 0.021667   | 0.678312  |     |
| GOTERM_BP_ | GO:0042769-DNA damage response, detection i           | 9     | 0.824499 | 5.12E-04 | MAD2L1, CEP57, SSB, SNRPF, SPA 715     | 25         | 16792    | 6.575888112 | 0.5935175       | 0.027185   | 0.676282  |     |
| GOTERM_BP_ | GO:0006268-DNA unwinding involved in DNA r            | 5     | 0.588928 | 5.54E-04 | MCM2, MCM4, TOP2A, RAD51, MCF 715      | 10         | 16792    | 11.74265734 | 0.6684249       | 0.028632   | 0.948243  |     |
| GOTERM_BP_ | GO:0006298-mismatch repair                            | 8     | 0.942285 | 5.79E-04 | EXO1, POLD3, RPA2, MSH6, POLD1, 715    | 35         | 16792    | 5.368071928 | 0.6843165       | 0.029132   | 0.990222  |     |
| GOTERM_BP_ | GO:0051170-nuclear import                             | 6     | 0.706714 | 7.40E-04 | SNRNP1, SNRPF, SNRPE, SMN2, SM 715     | 18         | 16792    | 7.828438228 | 0.7707794       | 0.036157   | 1.263347  |     |
| GOTERM_BP_ | GO:0006296-nucleotide-excision repair, DNA int        | 8     | 0.942285 | 8.23E-04 | RFC5, POLD3, RPA2, RFC3, RFC4, RF 715  | 37         | 16792    | 5.077905878 | 0.8060158       | 0.03921    | 1.405481  |     |
| GOTERM_BP_ | GO:0007087-error-free translation synthesis           | 6     | 0.706714 | 9.69E-04 | RFC5, RPA2, RFC3, RFC4, PCN1 715       | 19         | 16792    | 7.146415164 | 0.8548485       | 0.044912   | 1.65195   |     |
| GOTERM_BP_ | GO:0003368-nucleotide-excision repair, DNA int        | 8     | 0.942285 | 9.73E-04 | RFC5, POLD3, RPA2, RFC3, RFC4, RF 715  | 38         | 16792    | 4.944276776 | 0.8595688       | 0.040463   | 1.685827  |     |
| GOTERM_BP_ | GO:0000734-double-strand break repair via hom         | 11    | 1.295642 | 0.001113 | RAD51C, RPA2, NABP2, RAD51AP1, 715     | 74         | 16792    | 3.491060291 | 0.9101584       | 0.049128   | 1.894901  |     |
| GOTERM_BP_ | GO:0007052-mitotic spindle organization               | 7     | 0.824499 | 0.001433 | CENB1, SPC25, KHNTD1, NDC80, AI 715    | 30         | 16792    | 5.47990676  | 0.9424001       | 0.061458   | 2.43337   |     |
| GOTERM_BP_ | GO:0006397-mRNA processing                            | 18    | 2.120141 | 0.001663 | SRSF1, RBFOX1, KHDRBS1, UZF2F, R 715   | 179        | 16792    | 2.361651756 | 0.6796276       | 0.069508   | 2.81972   |     |
| GOTERM_BP_ | GO:0006409-RNA export from nucleus                    | 7     | 0.824499 | 0.002034 | NDC1, NUP160, SEH1L, RAE1, RAN, I 715  | 32         | 16792    | 5.137412587 | 0.9826454       | 0.082638   | 3.438381  |     |
| GOTERM_BP_ | GO:0016032-viral process                              | 25    | 2.944641 | 0.002216 | USP7, MSH6, SLC25A4, NUP160, TAI 715   | 299        | 16792    | 1.963655074 | 0.9879276       | 0.087911   | 3.740385  |     |
| GOTERM_BP_ | GO:0007077-mitotic nuclear envelope disassem          | 8     | 0.942285 | 0.002369 | NDC1, CCNB1, CCN2B, NUP160, SEH 715    | 44         | 16792    | 4.270057216 | 0.9911099       | 0.091885   | 3.994267  |     |
| GOTERM_BP_ | GO:0045893-positive regulation of transcription       | 37    | 4.358068 | 0.002448 | ENY2, INGS, RAI1, HMG82, ELF2, RSI 715 | 515        | 16792    | 1.687294453 | 0.9923972       | 0.092974   | 4.123786  |     |
| GOTERM_BP_ | GO:0006310-DNA recombination                          | 11    | 1.295642 | 0.002677 | EXO1, XRCC5, LIG3, RPAIN, END 715      | 83         | 16792    | 3.112511585 | 0.9951948       | 0.029976   | 4.502705  |     |
| GOTERM_BP_ | GO:0042795-siRNA transcription from RNA pol           | 10    | 1.177856 | 0.002759 | TAF11, CCNT2, PHAX, NABP2, ICE2, I 715 | 70         | 16792    | 3.355044955 | 0.9959194       | 0.100394   | 4.637341  |     |
| GOTERM_BP_ | GO:2000001-regulation of DNA damage checkp            | 4     | 0.471143 | 0.003651 | RPA2, WDR76, FEM1B, RNASEH2B 715       | 8          | 16792    | 11.74265734 | 0.9993129       | 0.128391   | 6.092397  |     |
| GOTERM_BP_ | GO:0000076-DNA replication checkpoint                 | 4     | 0.471143 | 0.003651 | CDC6, CDC45, TIPIN, RAD17 715          | 8          | 16792    | 11.74265734 | 0.9993129       | 0.128391   | 6.092397  |     |
| GOTERM_BP_ | GO:0000467-exonucleolytic trimming to genera          | 4     | 0.471143 | 0.003651 | EXOSC9, EXOSC2, ERIZ, ER13 715         | 8          | 16792    | 11.74265734 | 0.9993129       | 0.128391   | 6.092397  |     |
| GOTERM_BP_ | GO:0010569-regulation of double-strand break          | 5     | 0.588928 | 0.003918 | KDM1A, RPA2, RAD51AP1, CHEK1, R 715    | 16         | 16792    | 7.339160839 | 0.9995965       | 0.134744   | 6.522958  |     |
| GOTERM_BP_ | GO:0007051-spindle organization                       | 5     | 0.588928 | 0.003918 | CKAP5, SPAG5, TTK, AURKA, RANBP: 715   | 16         | 16792    | 7.339160839 | 0.9995965       | 0.134744   | 6.522958  |     |
| GOTERM_BP_ | GO:0036297-interstrand cross-link repair              | 8     | 0.942285 | 0.004423 | FANCL, RPA2, RAD51AP1, FANCI, RN 715   | 49         | 16792    | 3.834337091 | 0.9998531       | 0.148253   | 7.334404  |     |
| GOTERM_BP_ | GO:0006376-mRNA splice site selection                 | 5     | 0.588928 | 0.004953 | SRSF1, C7ORF955-LUC12, SRSF10, L 715   | 17         | 16792    | 6.907445496 | 0.9999491       | 0.161826   | 8.178351  |     |
| GOTERM_BP_ | GO:0006303-double-strand break repair via non         | 9     | 1.060071 | 0.005041 | XRCC5, SUMO1, RIF1, MDC1, SMC5, 715    | 63         | 16792    | 3.355044955 | 0.9995974       | 0.161831   | 8.138441  |     |
| GOTERM_BP_ | GO:0051383-kinetochore organization                   | 3     | 0.353357 | 0.005264 | SMC2, CENPH, SMC4 715                  | 3          | 16792    | 23.48531469 | 0.9999727       | 0.165699   | 8.66972   |     |
| GOTERM_BP_ | GO:0075733-intracellular transport of virus           | 8     | 0.942285 | 0.005542 | NDC1, NUP160, SEH1L, RAE1, RAN, I 715  | 51         | 16792    | 3.683970931 | 0.9998843       | 0.17099    | 9.017343  |     |
| GOTERM_BP_ | GO:0043928-exonucleolytic nuclear-transcrib           | 6     | 0.706714 | 0.006965 | DIS3, EXOSC9, EXOSC2, LSM5, LSM2 715   | 29         | 16792    | 4.859030625 | 0.9999991       | 0.207001   | 11.31752  |     |
| GOTERM_BP_ | GO:0045724-positive regulation of cilium assem        | 4     | 0.471    |          |                                        |            |          |             |                 |            |           |     |

|           |            |                                                      |    |          |          |                                   |     |     |       |             |   |          |          |
|-----------|------------|------------------------------------------------------|----|----------|----------|-----------------------------------|-----|-----|-------|-------------|---|----------|----------|
| GOTERM_BP | GO:0008053 | mitochondrial fusion                                 | 4  | 0.471143 | 0.038794 | USP30, OPA1, GDAP1, AFG3L2        | 715 | 18  | 16792 | 5.218958819 | 1 | 0.571329 | 49.33418 |
| GOTERM_BP | GO:0008020 | protein K6-linked ubiquitination                     | 3  | 0.353357 | 0.042631 | UBE2S, BRCA1, UBE2T               | 715 | 8   | 16792 | 8.806993007 | 1 | 0.602584 | 52.6995  |
| GOTERM_BP | GO:0008156 | negative regulation of DNA replication               | 4  | 0.471143 | 0.044654 | CDC6, GMNN, TTF1, RAD17           | 715 | 19  | 16792 | 4.944276776 | 1 | 0.616109 | 54.38826 |
| GOTERM_BP | GO:0007094 | mitotic spindle assembly checkpoint                  | 4  | 0.471143 | 0.050926 | MAD2L1, TTK, BUB1B, MAD2L2        | 715 | 20  | 16792 | 4.697062937 | 1 | 0.66177  | 59.26948 |
| GOTERM_BP | GO:0010389 | regulation of G2/M transition of m3                  | 3  | 0.353357 | 0.053295 | CDKN2A, RNASEH2B, PKIA            | 715 | 9   | 16792 | 7.828438228 | 1 | 0.675075 | 60.98195 |
| GOTERM_BP | GO:0042754 | negative regulation of circadian rhythm              | 3  | 0.353357 | 0.053295 | SIN3A, SFPQ, SUV39H2              | 715 | 9   | 16792 | 7.828438228 | 1 | 0.675075 | 60.98195 |
| GOTERM_BP | GO:0010388 | cullin neddylation                                   | 3  | 0.353357 | 0.053295 | COP53, COP57B, COP58              | 715 | 9   | 16792 | 7.828438228 | 1 | 0.675075 | 60.98195 |
| GOTERM_BP | GO:0006353 | DNA-templated transcription, term                    | 3  | 0.353357 | 0.053295 | TTF1, SMN2, SMN1                  | 715 | 9   | 16792 | 7.828438228 | 1 | 0.675075 | 60.98195 |
| GOTERM_BP | GO:0016573 | histone acetylation                                  | 5  | 0.588928 | 0.054798 | ING5, WDR75, EPC2, TAF5, GTF3C4   | 715 | 34  | 16792 | 3.453722748 | 1 | 0.681762 | 62.03246 |
| GOTERM_BP | GO:0010212 | response to ionizing radiation                       | 6  | 0.706714 | 0.056154 | RAD51C, NABP2, RRM1, RNF168, TC   | 715 | 49  | 16792 | 2.875752819 | 1 | 0.687221 | 62.95748 |
| GOTERM_BP | GO:0006139 | nucleobase-containing compound                       | 6  | 0.706714 | 0.056154 | TYMS, METTL4, CRMP1, CTP51, BRIP  | 715 | 49  | 16792 | 2.875752819 | 1 | 0.687221 | 62.95748 |
| GOTERM_BP | GO:0001701 | in utero embryonic development                       | 14 | 1.648999 | 0.056346 | SRSF1, TAPT1, C2CD3, KIF3A, COP3  | 715 | 187 | 16792 | 1.758258853 | 1 | 0.684485 | 63.08695 |
| GOTERM_BP | GO:0048025 | negative regulation of mRNA splicing                 | 4  | 0.471143 | 0.0576   | SRSF10, SRSF12, UZAF2, TRA2B      | 715 | 21  | 16792 | 4.473393273 | 1 | 0.689467 | 63.92063 |
| GOTERM_BP | GO:0000132 | establishment of mitotic spindle                     | 4  | 0.471143 | 0.0576   | CENPA, NDC80, SPD1L, CDK5RAP2     | 715 | 21  | 16792 | 4.473393273 | 1 | 0.689467 | 63.92063 |
| GOTERM_BP | GO:0034501 | protein localization to kinetochore                  | 3  | 0.353357 | 0.064784 | TTK, BUB1B, SPD1L                 | 715 | 10  | 16792 | 7.045594406 | 1 | 0.729473 | 68.36667 |
| GOTERM_BP | GO:0046785 | microtubule polymerization                           | 3  | 0.353357 | 0.064784 | CKAP5, FBXO5, HDGFRP3             | 715 | 10  | 16792 | 7.045594406 | 1 | 0.729473 | 68.36667 |
| GOTERM_BP | GO:0035871 | protein K11-linked deubiquitination                  | 3  | 0.353357 | 0.064784 | USP30, OTUD7A, USP37              | 715 | 10  | 16792 | 7.045594406 | 1 | 0.729473 | 68.36667 |
| GOTERM_BP | GO:0061351 | neural precursor cell proliferation                  | 3  | 0.353357 | 0.064784 | KIF3A, DBN1, ORC3                 | 715 | 10  | 16792 | 7.045594406 | 1 | 0.729473 | 68.36667 |
| GOTERM_BP | GO:0000723 | telomere maintenance                                 | 5  | 0.588928 | 0.065192 | XRCF5, POLD3, RPA2, POLD1, PCNA   | 715 | 36  | 16792 | 3.261849262 | 1 | 0.728315 | 68.60268 |
| GOTERM_BP | GO:0071025 | mitochondrial translational elongation               | 8  | 0.942285 | 0.069629 | MRPL2, MRPL11, MRPL1, MRPS26, I   | 715 | 85  | 16792 | 2.210382559 | 1 | 0.74884  | 71.06747 |
| GOTERM_BP | GO:0007080 | mitotic metaphase plate congression                  | 5  | 0.588928 | 0.070746 | CENB1, KIF22, SEH1L, SPD1L, CDCA5 | 715 | 37  | 16792 | 3.173691174 | 1 | 0.751249 | 71.65908 |
| GOTERM_BP | GO:0043044 | ATP-dependent chromatin remodeling                   | 4  | 0.471143 | 0.072103 | HDAC2, ACTL6A, HNRNPCC, SMARCA4   | 715 | 23  | 16792 | 4.084402554 | 1 | 0.754783 | 72.36157 |
| GOTERM_BP | GO:0000381 | regulation of alternative mRNA splicing              | 5  | 0.588928 | 0.076535 | RBFOX1, SRSF12, TRA2B, RBM4, NSF  | 715 | 38  | 16792 | 3.090172985 | 1 | 0.772721 | 74.54471 |
| GOTERM_BP | GO:0035970 | peptidyl-L-threonine dephosphorylation               | 3  | 0.353357 | 0.077008 | PPM1D, PPM1E, PPM1B               | 715 | 11  | 16792 | 6.405085823 | 1 | 0.771745 | 74.76763 |
| GOTERM_BP | GO:0033120 | positive regulation of RNA splicing                  | 3  | 0.353357 | 0.077008 | SRSF1, UZAF2, HNRNPL              | 715 | 11  | 16792 | 6.405085823 | 1 | 0.771745 | 74.76763 |
| GOTERM_BP | GO:0046811 | rhythmic process                                     | 6  | 0.706714 | 0.078629 | CDK5R1, SIN3A, SFPQ, CBX3, TOP2A  | 715 | 54  | 16792 | 2.609479409 | 1 | 0.775944 | 75.5187  |
| GOTERM_BP | GO:0007088 | regulation of mitotic nuclear division               | 4  | 0.471143 | 0.079906 | MKI67, PDXP, FBXO5, PIN1          | 715 | 24  | 16792 | 3.914219114 | 1 | 0.778505 | 76.09504 |
| GOTERM_BP | GO:0021997 | neuronal plate axis specification                    | 2  | 0.235571 | 0.083235 | C2CD3, PTCH1                      | 715 | 2   | 16792 | 23.48531469 | 1 | 0.78961  | 77.53862 |
| GOTERM_BP | GO:0007057 | spindle assembly involved in female meiosis          | 2  | 0.235571 | 0.083235 | FBXO5, AURKA                      | 715 | 2   | 16792 | 23.48531469 | 1 | 0.78961  | 77.53862 |
| GOTERM_BP | GO:0006267 | pre-replicative complex assembly                     | 2  | 0.235571 | 0.083235 | CDC45, ORC3                       | 715 | 2   | 16792 | 23.48531469 | 1 | 0.78961  | 77.53862 |
| GOTERM_BP | GO:0000354 | cis assembly of pre-catalytic spliceosome            | 2  | 0.235571 | 0.083235 | DDX23, SNRNP200                   | 715 | 2   | 16792 | 23.48531469 | 1 | 0.78961  | 77.53862 |
| GOTERM_BP | GO:0007346 | regulation of mitotic cell cycle                     | 5  | 0.588928 | 0.088798 | CKS2, FBXO5, BIRC5, PTCH1, ZNF266 | 715 | 40  | 16792 | 2.935664336 | 1 | 0.808538 | 79.7691  |
| GOTERM_BP | GO:0001833 | inner cell mass cell proliferation                   | 3  | 0.353357 | 0.089883 | NCAPG2, CHEK1, PALB2              | 715 | 12  | 16792 | 5.871328671 | 1 | 0.809755 | 80.17932 |
| GOTERM_BP | GO:0035518 | histone H2A monoubiquitination                       | 3  | 0.353357 | 0.089883 | TRIM37, RNF168, PCGT1             | 715 | 12  | 16792 | 5.871328671 | 1 | 0.809755 | 80.17932 |
| GOTERM_BP | GO:0000244 | spliceosome tri-snRNP complex assembly               | 3  | 0.353357 | 0.089883 | SRSF10, SRSF12, SRSF3             | 715 | 12  | 16792 | 5.871328671 | 1 | 0.809755 | 80.17932 |
| GOTERM_BP | GO:0040015 | negative regulation of multicellular organism growth | 3  | 0.353357 | 0.089883 | RAI1, ALMS1, PTCH1                | 715 | 12  | 16792 | 5.871328671 | 1 | 0.809755 | 80.17932 |
| GOTERM_BP | GO:0006379 | mRNA cleavage                                        | 3  | 0.353357 | 0.089883 | CSTF3, CPSF3, CSTF1               | 715 | 12  | 16792 | 5.871328671 | 1 | 0.809755 | 80.17932 |
| GOTERM_BP | GO:0006259 | DNA metabolic process                                | 4  | 0.471143 | 0.096542 | MKI67, RAN, TOPBP1, KPN2A         | 715 | 26  | 16792 | 3.613125336 | 1 | 0.830201 | 82.52911 |
| GOTERM_BP | GO:0003048 | tRNA methylation                                     | 4  | 0.471143 | 0.096542 | LCMT2, THUMP2D, METTL2A, METT     | 715 | 26  | 16792 | 3.613125336 | 1 | 0.830201 | 82.52911 |
| GOTERM_BP | GO:1900439 | regulation of cellular response to hypoxia           | 7  | 0.824499 | 0.099205 | NDC1, RPA2, NUP160, SEH1L, RAE1   | 715 | 75  | 16792 | 2.191962704 | 1 | 0.836154 | 83.39328 |

#### Enriched GO BP terms by genes over-expressed in Subtype II MCC

| Category  | Term       | Count                                                      | %  | PValue   | Genes    | List Total                           | Pop Hits | Pop Total | Fold Enrichment | Bonferroni  | Benjamini | FDR      |          |
|-----------|------------|------------------------------------------------------------|----|----------|----------|--------------------------------------|----------|-----------|-----------------|-------------|-----------|----------|----------|
| GOTERM_BP | GO:0051092 | positive regulation of NF-kappaB transcription             | 15 | 2.29709  | 1.35e-05 | BCL10, NFKBIA, TRAF3, TRIM15, MID2   | 451      | 133       | 16792           | 4.19918977  | 0.0326016 | 0.032602 | 0.023714 |
| GOTERM_BP | GO:0002052 | positive regulation of neuroblast proliferation            | 6  | 0.918836 | 1.50E-04 | DCIT, SMO, SOX10, DRD2, CX3CR1, G    | 451      | 20        | 16792           | 11.16984479 | 0.3090411 | 0.061667 | 0.246168 |
| GOTERM_BP | GO:0048661 | positive regulation of smooth muscle cell proliferation    | 9  | 1.378254 | 1.88E-04 | FGFR2, NAMPT, EREG, PTGS2, EDN1      | 451      | 60        | 16792           | 5.584922395 | 0.3711274 | 0.14325  | 0.331337 |
| GOTERM_BP | GO:0002053 | positive regulation of mesenchymal cell proliferation      | 6  | 0.918836 | 5.58E-04 | FGFR2, SMO, TP63, CHRDL1, MYC, FOXD1 | 451      | 26        | 16792           | 8.5921883   | 0.74691   | 0.290718 | 0.978345 |
| GOTERM_BP | GO:0045944 | positive regulation of transcription                       | 45 | 6.891271 | 5.65E-04 | CSF3, FGFR2, NAMPT, HNF1B, CDX1      | 451      | 981       | 16792           | 1.707927338 | 0.75102   | 0.242761 | 0.989945 |
| GOTERM_BP | GO:0006954 | inflammatory response                                      | 23 | 3.522205 | 5.92E-04 | SELP, NFKB1, C4A, PTGS2, C4B, C4B    | 451      | 379       | 16792           | 2.295911259 | 0.7669241 | 0.215518 | 1.036698 |
| GOTERM_BP | GO:0046854 | phosphatidylinositol phosphorylation                       | 10 | 1.531394 | 9.34E-04 | FGFR2, FGF7, EREG, PIK3C3, PDGFR     | 451      | 94        | 16792           | 3.960937869 | 0.6799226 | 0.280101 | 1.632639 |
| GOTERM_BP | GO:0014066 | regulation of phosphatidylinositol phosphorylation         | 10 | 1.378254 | 0.001136 | FGFR2, FGF7, EREG, PDGFR, FGF23      | 451      | 78        | 16792           | 4.29609415  | 0.9390168 | 0.295601 | 1.981587 |
| GOTERM_BP | GO:0043123 | positive regulation of I-kappaB kinase activity            | 13 | 1.990812 | 0.001348 | BCL10, PELL1, LPAR1, MID2, TRAF3     | 451      | 161       | 16792           | 3.006376444 | 0.9638592 | 0.308253 | 2.347838 |
| GOTERM_BP | GO:0045007 | innate immune response                                     | 24 | 3.675345 | 0.001368 | IGHG1, MBL2, BCL10, CR1, C4A, C4B    | 451      | 430       | 16792           | 2.078110658 | 0.9655673 | 0.286002 | 2.381661 |
| GOTERM_BP | GO:0005877 | protein targeting to Golgi                                 | 5  | 0.765697 | 0.001753 | RGPD6, RGPD5, RGPD8, RGPD4, RGF      | 451      | 45        | 16792           | 9.308203991 | 0.9866748 | 0.324671 | 3.042537 |
| GOTERM_BP | GO:0048015 | phosphatidylinositol-mediated signaling                    | 10 | 1.531394 | 0.002178 | FGFR2, FGF7, EREG, PIK3C3, PDGFR     | 451      | 106       | 16792           | 3.512529808 | 0.9953284 | 0.360576 | 3.766995 |
| GOTERM_BP | GO:0071320 | cellular response to cAMP                                  | 7  | 1.071975 | 0.00257  | ZFP36L1, SLC8A1, STAR, AKAP7, PDE    | 451      | 52        | 16792           | 5.012109841 | 0.998224  | 0.385645 | 4.43064  |
| GOTERM_BP | GO:0018108 | peptidyl-tyrosine phosphorylation                          | 12 | 1.837672 | 0.002798 | EPHA5, FGF22, FLT1, FGF7, EREG, M    | 451      | 153       | 16792           | 2.92022086  | 0.998987  | 0.388896 | 4.813824 |
| GOTERM_BP | GO:0042157 | lipoprotein metabolic process                              | 6  | 0.918836 | 0.003273 | APOB, BMP1, LRP1, APOA5, APOLE       | 451      | 38        | 16792           | 5.878865679 | 0.9996862 | 0.415965 | 5.608776 |
| GOTERM_BP | GO:0001819 | positive regulation of cytokine production                 | 5  | 0.765697 | 0.003533 | CARD11, SLC11A1, PELL1, HNF1B, CDX1  | 451      | 24        | 16792           | 7.568363659 | 0.9998351 | 0.419802 | 6.042245 |
| GOTERM_BP | GO:0032922 | circadian regulation of gene expression                    | 7  | 1.071975 | 0.004096 | NAMPT, HNF1B, NPAS2, NCOA2, DR       | 451      | 57        | 16792           | 4.572451083 | 0.999959  | 0.447983 | 6.972681 |
| GOTERM_BP | GO:0032496 | response to lipopolysaccharide                             | 12 | 1.837672 | 0.004747 | TNFRSF9, SLC11A1, OTD5, SELP, PI     | 451      | 164       | 16792           | 2.742352388 | 0.9999918 | 0.478253 | 8.037753 |
| GOTERM_BP | GO:0050679 | positive regulation of epithelial cell proliferation       | 7  | 1.071975 | 0.005285 | FGFR2, SMO, FGF7, NRAA3, MYC, FC     | 451      | 60        | 16792           | 4.343828529 | 0.9999978 | 0.496571 | 9.808551 |
| GOTERM_BP | GO:0043547 | positive regulation of GTPase activity                     | 27 | 4.134763 | 0.005464 | FGD2, FGFR2, RAB39A2, ARFGAP2        | 451      | 565       | 16792           | 1.779267312 | 0.9999986 | 0.490409 | 9.196848 |
| GOTERM_BP | GO:0015721 | bile acid and bile salt transport                          | 5  | 0.765697 | 0.005478 | NCOA2, ABCG3, SLC01C1, CEACAM1       | 451      | 27        | 16792           | 6.894965919 | 0.9999987 | 0.474655 | 9.219436 |
| GOTERM_BP | GO:0001516 | prostaglandin biosynthetic process                         | 4  | 0.612557 | 0.005583 | PTGDS, PTGS2, EDN1, PLA2G4F          | 451      | 14        | 16792           | 10.63794742 | 0.999999  | 0.465448 | 9.389117 |
| GOTERM_BP | GO:0042060 | wound healing                                              | 8  | 1.225115 | 0.005598 | SLC11A1, EREG, ECLN2, PDGFR          | 451      | 80        | 16792           | 3.723281596 | 0.999999  | 0.451537 | 9.412092 |
| GOTERM_BP | GO:0051482 | positive regulation of cytosolic calcium ion concentration | 5  | 0.765697 | 0.006258 | F2RL3, AGTR1, DRD2, EDN1, LPAR1      | 451      | 28        | 16792           | 6.648717137 | 0.9999998 | 0.474649 | 10.46501 |
| GOTERM_BP | GO:0035556 | intracellular signal transduction                          | 21 | 3.215926 | 0.006275 | ZFP36, DRD2, MCF2, EDN1, MKRN2       | 451      | 403       | 16792           | 1.940171552 | 0.9999998 | 0.461887 | 10.49295 |
| GOTERM_BP | GO:0009611 | response to wounding                                       | 7  | 1.071975 | 0.006708 | ZFP36, ZFP36L1, F2RL3, FGF7, POU5    | 451      | 63        | 16792           | 4.136979552 | 0.9999999 | 0.471165 | 11.17685 |
| GOTERM_BP | GO:0050727 | regulation of inflammatory response                        | 7  | 1.071975 | 0.006708 | CASP5, AGTR1, PTGS2, MGLL, BCL2      | 451      | 63        | 16792           | 4.136979552 | 0.9999999 | 0.471165 | 11.17685 |
| GOTERM_BP | GO:0001525 | angiogenesis                                               | 14 | 2.143951 | 0.007253 | SAT1, FGFR2, FLT1, PTGS2, MMP19      | 451      | 223       | 16792           | 2.337486204 | 1         | 0.484971 | 12.03157 |
| GOTERM_BP | GO:0051897 | positive regulation of protein kinase activity             | 8  | 1.225115 | 0.007289 | CSF3, AKR1C2, F7, ITSN1, NRG1, FGF   | 451      | 84        | 16792           | 3.545982473 | 1         | 0.474286 | 12.08729 |
| GOTERM_BP | GO:0043087 | regulation of GTPase activity                              | 7  | 1.071975 | 0.007799 | EPHA5, FGD2, RAB39A2, PROM2, S       | 451      | 65        | 16792           | 4.009687873 | 1         | 0.485456 | 12.87997 |
| GOTERM_BP | GO:0044344 | cellular response to fibroblast growth factor              | 5  | 0.765697 | 0.008031 | ZFP36, ZFP36L1, EGR3, STAR, MYC      | 451      | 30        | 16792           | 6.205469327 | 1         | 0.483915 | 13.23752 |
| GOTERM_BP | GO:0048525 | negative regulation of viral process                       | 3  | 0.459418 | 0.010007 | MBL2, LTF, APOBEC3G                  | 451      | 6         | 16792           | 18.61640798 | 1         | 0.549958 | 16.23063 |
| GOTERM_BP | GO:0032680 |                                                            |    |          |          |                                      |          |           |                 |             |           |          |          |

|           |            |                                        |    |          |          |                                   |     |     |       |             |   |          |          |
|-----------|------------|----------------------------------------|----|----------|----------|-----------------------------------|-----|-----|-------|-------------|---|----------|----------|
| GOTERM_BP | GO:0045600 | positive regulation of fat cell differ | 5  | 0.765697 | 0.036706 | ZFP36, ZFP36L1, MEDAG, ADIG, TMI  | 451 | 47  | 16792 | 3.960937869 | 1 | 0.7843   | 48.23873 |
| GOTERM_BP | GO:2000145 | regulation of cell motility            | 4  | 0.612557 | 0.038147 | EREG, PKN2, EGF, NRG1             | 451 | 28  | 16792 | 5.318973709 | 1 | 0.791777 | 49.58598 |
| GOTERM_BP | GO:0032715 | negative regulation of interleukin-4   | 4  | 0.612557 | 0.038147 | BPI, ARRB1, KLF2, GAS6            | 451 | 28  | 16792 | 5.318973709 | 1 | 0.791777 | 49.58598 |
| GOTERM_BP | GO:0030728 | ovulation                              | 3  | 0.459418 | 0.039598 | EREG, PTGS2, MYC                  | 451 | 12  | 16792 | 9.308203991 | 1 | 0.798855 | 50.90796 |
| GOTERM_BP | GO:0035815 | positive regulation of renal sodium    | 3  | 0.459418 | 0.039598 | DRD2, EDN1, NPR1                  | 451 | 12  | 16792 | 9.308203991 | 1 | 0.798855 | 50.90796 |
| GOTERM_BP | GO:1900004 | negative regulation of serine-type     | 3  | 0.459418 | 0.039598 | CR1, ANXA8, ANXA8L1               | 451 | 12  | 16792 | 9.308203991 | 1 | 0.798855 | 50.90796 |
| GOTERM_BP | GO:0071260 | cellular response to mechanical sti    | 6  | 0.918836 | 0.041631 | CASP5, BCL10, PTGS2, TLR3, CNN2,  | 451 | 71  | 16792 | 3.146435152 | 1 | 0.810063 | 52.70625 |
| GOTERM_BP | GO:0050766 | positive regulation of phagocytosis    | 4  | 0.612557 | 0.041729 | MBL2, SLC11A1, TUB, GAS6          | 451 | 29  | 16792 | 5.135560823 | 1 | 0.805833 | 52.7913  |
| GOTERM_BP | GO:0036092 | phosphatidylinositol-3-phosphate       | 5  | 0.765697 | 0.041843 | FGFR2, FGF7, PIK3C3, FGF2, FGF2   | 451 | 49  | 16792 | 3.799266935 | 1 | 0.801775 | 52.89069 |
| GOTERM_BP | GO:0016485 | protein processing                     | 6  | 0.918836 | 0.043795 | PIK3C3, RHBDF1, CPXM2, F7, CPD,   | 451 | 72  | 16792 | 3.102734664 | 1 | 0.811727 | 54.55216 |
| GOTERM_BP | GO:0032480 | negative regulation of type I interfe  | 4  | 0.612557 | 0.045473 | DDX58, IKBKE, OTUD5, UBA7         | 451 | 30  | 16792 | 4.964375462 | 1 | 0.819034 | 55.93616 |
| GOTERM_BP | GO:0030449 | regulation of complement activati      | 4  | 0.612557 | 0.045473 | CR1, C4A, C4B, 2, C4B             | 451 | 30  | 16792 | 4.964375462 | 1 | 0.819034 | 55.93616 |
| GOTERM_BP | GO:0051770 | positive regulation of nitric-oxide    | 3  | 0.459418 | 0.045983 | NAMPT, CCL20, MAP2K6              | 451 | 13  | 16792 | 8.5921883   | 1 | 0.817986 | 56.34939 |
| GOTERM_BP | GO:0035810 | positive regulation of urine volume    | 3  | 0.459418 | 0.045983 | DRD2, EDN1, NPR1                  | 451 | 13  | 16792 | 8.5921883   | 1 | 0.817986 | 56.34939 |
| GOTERM_BP | GO:0032897 | negative regulation of viral transcri  | 3  | 0.459418 | 0.045983 | ZFP36, TRIM8, MID2                | 451 | 13  | 16792 | 8.5921883   | 1 | 0.817986 | 56.34939 |
| GOTERM_BP | GO:0014032 | neural crest cell development          | 3  | 0.459418 | 0.045983 | EDN1, FOXC2, NRG1                 | 451 | 13  | 16792 | 8.5921883   | 1 | 0.817986 | 56.34939 |
| GOTERM_BP | GO:0031086 | nuclear-transcribed mRNA catabol       | 2  | 0.306279 | 0.052888 | ZFP36, ZFP36L1                    | 451 | 2   | 16792 | 37.23281596 | 1 | 0.855974 | 61.58495 |
| GOTERM_BP | GO:0060529 | squamous basal epithelial stem cel     | 2  | 0.306279 | 0.052888 | FGFR2, TP63                       | 451 | 2   | 16792 | 37.23281596 | 1 | 0.855974 | 61.58495 |
| GOTERM_BP | GO:0071378 | cellular response to growth hormo      | 2  | 0.306279 | 0.052888 | STAR, MYC                         | 451 | 2   | 16792 | 37.23281596 | 1 | 0.855974 | 61.58495 |
| GOTERM_BP | GO:1902172 | regulation of keratinocyte apoptot     | 2  | 0.306279 | 0.052888 | ZFP36, ZFP36L1                    | 451 | 2   | 16792 | 37.23281596 | 1 | 0.855974 | 61.58495 |
| GOTERM_BP | GO:0006583 | melanin biosynthetic process from      | 2  | 0.306279 | 0.052888 | DCT, TYR                          | 451 | 2   | 16792 | 37.23281596 | 1 | 0.855974 | 61.58495 |
| GOTERM_BP | GO:1904582 | regulation of intracellular            | 2  | 0.306279 | 0.052888 | ZFP36, ZFP36L1                    | 451 | 2   | 16792 | 37.23281596 | 1 | 0.855974 | 61.58495 |
| GOTERM_BP | GO:0007032 | endosome organization                  | 4  | 0.612557 | 0.053444 | ANXA8, ANXA8L1, PIK3C3, ALS2CL    | 451 | 32  | 16792 | 4.654101996 | 1 | 0.854977 | 61.98274 |
| GOTERM_BP | GO:0048146 | positive regulation of fibroblast pr   | 5  | 0.765697 | 0.056371 | FOSL2, EREG, PDGFRA, MYC, GAS6    | 451 | 54  | 16792 | 3.447482896 | 1 | 0.855974 | 62.00329 |
| GOTERM_BP | GO:0015758 | glucose transport                      | 4  | 0.612557 | 0.057658 | SLC2A9, SLC2A3, SLC5A1, EDN1      | 451 | 33  | 16792 | 4.513068602 | 1 | 0.868648 | 64.85799 |
| GOTERM_BP | GO:0050829 | defense response to Gram-negativ       | 5  | 0.765697 | 0.059563 | SLC11A1, SELP, BPI, GSDMD, TLR5   | 451 | 55  | 16792 | 3.384801451 | 1 | 0.871385 | 66.08816 |
| GOTERM_BP | GO:0042953 | lipoprotein transport                  | 3  | 0.459418 | 0.059774 | MA2, APOB, LRP1                   | 451 | 15  | 16792 | 7.446654931 | 1 | 0.871239 | 66.22228 |
| GOTERM_BP | GO:0001649 | osteoblast differentiation             | 7  | 1.071975 | 0.060803 | SMO, RRBP1, CLTC, WWTR1, RUNX2    | 451 | 104 | 16792 | 2.506056129 | 1 | 0.872341 | 66.86731 |
| GOTERM_BP | GO:0071346 | cellular response to interferon-gam    | 5  | 0.765697 | 0.066228 | CCL20, STAR, EDN1, TLR3, MYC      | 451 | 57  | 16792 | 3.266036488 | 1 | 0.89127  | 70.08042 |
| GOTERM_BP | GO:1902187 | negative regulation of viral release   | 3  | 0.459418 | 0.067134 | TRIM8, TRIM15, MID2               | 451 | 16  | 16792 | 6.981152993 | 1 | 0.89151  | 70.58761 |
| GOTERM_BP | GO:0035994 | response to muscle stretch             | 3  | 0.459418 | 0.067134 | SLC8A1, EDN1, NFKBIA              | 451 | 16  | 16792 | 6.981152993 | 1 | 0.89151  | 70.58761 |
| GOTERM_BP | GO:0006936 | muscle contraction                     | 7  | 1.071975 | 0.067862 | SLC8A1, DES, SLC6A8, MYL10, MYL1  | 451 | 107 | 16792 | 2.435791699 | 1 | 0.891092 | 70.98917 |
| GOTERM_BP | GO:0007275 | multicellular organism developme       | 21 | 3.215926 | 0.070071 | CSF3, CDX1, H1FNT, BMP1, MCL1, S  | 451 | 521 | 16792 | 1.500746901 | 1 | 0.89597  | 72.17593 |
| GOTERM_BP | GO:0060070 | canonical Wnt signaling pathway        | 6  | 0.918836 | 0.071994 | SMO, RARG, EGF, FZD4, MYC, TCF7L  | 451 | 83  | 16792 | 2.691528865 | 1 | 0.899589 | 73.17214 |
| GOTERM_BP | GO:0030097 | hemopoiesis                            | 5  | 0.765697 | 0.073264 | TTC7A, MKNK2, CNN2, RUNX1, RUN    | 451 | 59  | 16792 | 3.155232887 | 1 | 0.900909 | 73.81142 |
| GOTERM_BP | GO:0070935 | 3'-UTR-mediated mRNA stabilizati       | 3  | 0.459418 | 0.074775 | ZFP36, YBK3, BOLL                 | 451 | 17  | 16792 | 6.070496935 | 1 | 0.902947 | 74.55327 |
| GOTERM_BP | GO:2001240 | negative regulation of extrinsic apr   | 4  | 0.612557 | 0.076021 | EYA4, MCL1, CX3CR1, NRG1          | 451 | 37  | 16792 | 4.252169293 | 1 | 0.904092 | 75.15013 |
| GOTERM_BP | GO:0007249 | I-kappaB kinase/NF-kappaB signali      | 5  | 0.765697 | 0.076919 | BCL10, IKBK, RPK3, TLR3, TRADD    | 451 | 60  | 16792 | 3.102734664 | 1 | 0.904146 | 75.57174 |
| GOTERM_BP | GO:0045669 | positive regulation of osteoblast di   | 5  | 0.765697 | 0.076919 | LTF, TP63, GLI3, RUNX2, FGF2      | 451 | 60  | 16792 | 3.102734664 | 1 | 0.904146 | 75.57174 |
| GOTERM_BP | GO:0032490 | detection of molecule of bacterial     | 19 | 2.909648 | 0.077707 | CSF3, FGFR2, NAMPT, NACCI, FLT1,  | 451 | 466 | 16792 | 1.518076187 | 1 | 0.903877 | 75.93648 |
| GOTERM_BP | GO:0032765 | positive regulation of mast cell cyt   | 2  | 0.306279 | 0.078265 | BCL10, NRA43                      | 451 | 3   | 16792 | 24.82187731 | 1 | 0.902913 | 76.19143 |
| GOTERM_BP | GO:0035276 | oligopeptide transmembrane trans       | 2  | 0.306279 | 0.078265 | SLC15A1, CDH17                    | 451 | 3   | 16792 | 24.82187731 | 1 | 0.902913 | 76.19143 |
| GOTERM_BP | GO:0002282 | microglial cell activation involved    | 2  | 0.306279 | 0.078265 | CX3CR1, TLR3                      | 451 | 3   | 16792 | 24.82187731 | 1 | 0.902913 | 76.19143 |
| GOTERM_BP | GO:0018879 | biphenyl metabolic process             | 2  | 0.306279 | 0.078265 | STAR, SRD5A2                      | 451 | 3   | 16792 | 24.82187731 | 1 | 0.902913 | 76.19143 |
| GOTERM_BP | GO:0021769 | orbitofrontal cortex development       | 2  | 0.306279 | 0.078265 | FGFR2, DRD2                       | 451 | 3   | 16792 | 24.82187731 | 1 | 0.902913 | 76.19143 |
| GOTERM_BP | GO:0021940 | positive regulation of cerebellar gr   | 2  | 0.306279 | 0.078265 | EGF, FGF2                         | 451 | 3   | 16792 | 24.82187731 | 1 | 0.902913 | 76.19143 |
| GOTERM_BP | GO:0018894 | dibenzo-p-dioxin metabolic proces      | 2  | 0.306279 | 0.078265 | STAR, SRD5A2                      | 451 | 3   | 16792 | 24.82187731 | 1 | 0.902913 | 76.19143 |
| GOTERM_BP | GO:0018963 | phthalate metabolic process            | 2  | 0.306279 | 0.078265 | STAR, SRD5A2                      | 451 | 3   | 16792 | 24.82187731 | 1 | 0.902913 | 76.19143 |
| GOTERM_BP | GO:0032490 | detection of molecule of bacterial     | 19 | 2.909648 | 0.077707 | CSF3, FGFR2, NAMPT, NACCI, FLT1,  | 451 | 466 | 16792 | 1.518076187 | 1 | 0.903877 | 75.93648 |
| GOTERM_BP | GO:0021847 | ventricular zone neuroblast divisio    | 2  | 0.306279 | 0.078265 | DCT, FGFR2                        | 451 | 3   | 16792 | 24.82187731 | 1 | 0.902913 | 76.19143 |
| GOTERM_BP | GO:1900126 | negative regulation of hyaluronan      | 2  | 0.306279 | 0.078265 | AP2A1, CLTC                       | 451 | 3   | 16792 | 24.82187731 | 1 | 0.902913 | 76.19143 |
| GOTERM_BP | GO:0046639 | negative regulation of alpha-beta      | 2  | 0.306279 | 0.078265 | GLI3, IHH                         | 451 | 3   | 16792 | 24.82187731 | 1 | 0.902913 | 76.19143 |
| GOTERM_BP | GO:0071409 | cellular response to cycloheximide     | 2  | 0.306279 | 0.078265 | KLF2, MYC                         | 451 | 3   | 16792 | 24.82187731 | 1 | 0.902913 | 76.19143 |
| GOTERM_BP | GO:0019933 | cAMP-mediated signaling                | 4  | 0.612557 | 0.080969 | EPHA5, PDE4D, RAPGEF3, GLP1R      | 451 | 38  | 16792 | 3.919243786 | 1 | 0.908228 | 77.39184 |
| GOTERM_BP | GO:0043623 | cellular protein complex assembly      | 3  | 0.459418 | 0.082677 | OOEP, PDE4DIP, LOC653513          | 451 | 18  | 16792 | 6.205469327 | 1 | 0.910483 | 78.12045 |
| GOTERM_BP | GO:2000249 | regulation of actin cytoskeleton re    | 3  | 0.459418 | 0.082677 | PDGFRA, RHOD, RAPGEF3             | 451 | 18  | 16792 | 6.205469327 | 1 | 0.910483 | 78.12045 |
| GOTERM_BP | GO:0033280 | response to vitamin D                  | 3  | 0.459418 | 0.082677 | TYR, PTGS2, AQP3                  | 451 | 18  | 16792 | 6.205469327 | 1 | 0.910483 | 78.12045 |
| GOTERM_BP | GO:0048169 | regulation of long-term neuronal       | 3  | 0.459418 | 0.082677 | DRD2, GRIK2, CAMK2B               | 451 | 18  | 16792 | 6.205469327 | 1 | 0.910483 | 78.12045 |
| GOTERM_BP | GO:0070266 | necroptotic process                    | 3  | 0.459418 | 0.082677 | RIK3, TLR3, MLKL                  | 451 | 18  | 16792 | 6.205469327 | 1 | 0.910483 | 78.12045 |
| GOTERM_BP | GO:0046597 | negative regulation of viral entry     | 3  | 0.459418 | 0.082677 | TRIM8, GSN, MID2                  | 451 | 18  | 16792 | 6.205469327 | 1 | 0.910483 | 78.12045 |
| GOTERM_BP | GO:0071222 | cellular response to lipopolysacche    | 7  | 1.071975 | 0.083347 | ZFP36, CSF3, CCL20, STAR, CX3CR1, | 451 | 113 | 16792 | 2.306457626 | 1 | 0.909862 | 78.40013 |
| GOTERM_BP | GO:0008219 | cell death                             | 4  | 0.612557 | 0.086052 | BCL10, FOSL2, PMXP2, EMP1         | 451 | 39  | 16792 | 3.818750355 | 1 | 0.914606 | 79.49543 |
| GOTERM_BP | GO:0006895 | Golgi to endosome transport            | 3  | 0.459418 | 0.09082  | TGOLN2, VPS13C, AP2A1             | 451 | 19  | 16792 | 5.878865679 | 1 | 0.923839 | 81.29974 |
| GOTERM_BP | GO:0046827 | positive regulation of protein expo    | 3  | 0.459418 | 0.09082  | RAPGEF3, TCF7L2, GAS6             | 451 | 19  | 16792 | 5.878865679 | 1 | 0.923839 | 81.29974 |
| GOTERM_BP | GO:0060716 | labyrinthine layer blood vessel dev    | 3  | 0.459418 | 0.09082  | PLCD3, PLCD1, JUNB                | 451 | 19  | 16792 | 5.878865679 | 1 | 0.923839 | 81.29974 |
| GOTERM_BP | GO:0032332 | positive regulation of chondrocyte     | 3  | 0.459418 | 0.09082  | GLI3, RUNX2, IHH                  | 451 | 19  | 16792 | 5.878865679 | 1 | 0.923839 | 81.29974 |
| GOTERM_BP | GO:0043280 | positive regulation of cysteine-type   | 4  | 0.612557 | 0.091266 | BCL10, NOD1, ARRB1, MYC           | 451 | 40  | 16792 | 3.723281596 | 1 | 0.9227   | 81.46082 |
| GOTERM_BP | GO:0042742 | defense response to bacterium          | 8  | 1.225115 | 0.095384 | IGHG1, MBL2, SLC11A1, NOD1, CCL   | 451 | 145 | 16792 | 2.054224329 | 1 | 0.92954  | 82.88568 |
| GOTERM_BP | GO:0014068 | positive regulation of phosphatidy     | 5  | 0.765697 | 0.096516 | CSF3, SELP, FLT1, PDGFRA, NRG1    | 451 | 65  | 16792 | 2.864062767 | 1 | 0.929862 | 83.25909 |
| GOTERM_BP | GO:0060326 | cell chemotaxis                        | 5  | 0.765697 | 0.096516 | AGTR1, CCL20, CXCL2, PDGFRA, LPA  | 451 | 65  | 16792 | 2.864062767 | 1 | 0.929862 |          |
