# Supplementary material for: Gene expression profile identifies distinct molecular subtypes and potential therapeutic genes in Merkel cell carcinoma
Source: PubMed Central journal article supplement — Transl Oncol. 2020 Aug 6;13(11):100816. doi: 10.1016/j.tranon.2020.100816 (PMC7412862; doi:10.1016/j.tranon.2020.100816), 2020-08-06
Supplement: mmc4.pdf [file mmc4.pdf]

**Table 4. Enriched KEGG pathways in each subtypes of MCC**

**Enriched KEGG pathways by genes over-expressed in Subtype I MCC**

| Category     | Term                                       | Count | %        | PValue   | Genes                      | List | Tota | Pop  | Hits        | Pop        | Total     | Fold     | Enrichmen | Bonferroni | Benjamini | FDR |
|--------------|--------------------------------------------|-------|----------|----------|----------------------------|------|------|------|-------------|------------|-----------|----------|-----------|------------|-----------|-----|
| KEGG_PATHWAY | hsa03040:Spliceosome                       | 33    | 3.886926 | 4.71E-18 | SRSF1, CHERP, CRNKL1, 256  |      | 133  | 6879 | 6.667263863 | 7.81E-16   | 7.81E-16  | 5.72E-15 |           |            |           |     |
| KEGG_PATHWAY | hsa03030:DNA replication                   | 17    | 2.002356 | 3.00E-14 | MCM2, RNASEH2A, MC 256     |      | 36   | 6879 | 12.6891276  | 4.98E-12   | 2.49E-12  | 3.64E-11 |           |            |           |     |
| KEGG_PATHWAY | hsa04110:Cell cycle                        | 27    | 3.180212 | 2.76E-13 | CDC7, ANAPC1, CDC6, I 256  |      | 124  | 6879 | 5.850963962 | 4.59E-11   | 1.53E-11  | 3.36E-10 |           |            |           |     |
| KEGG_PATHWAY | hsa03430:Mismatch repair                   | 10    | 1.177856 | 5.95E-08 | EXO1, RFC5, POLD3, RP 256  |      | 23   | 6879 | 11.68308424 | 9.88E-06   | 2.47E-06  | 7.23E-05 |           |            |           |     |
| KEGG_PATHWAY | hsa03460:Fanconi anemia pathway            | 12    | 1.413428 | 2.80E-06 | FANCL, RAD51C, RPA2, 256   |      | 53   | 6879 | 6.084021226 | 4.65E-04   | 9.30E-05  | 0.003403 |           |            |           |     |
| KEGG_PATHWAY | hsa03013:RNA transport                     | 19    | 2.237927 | 6.15E-05 | CLNS1A, NUP160, RAN, 256   |      | 172  | 6879 | 2.968318496 | 0.01015418 | 0.0016996 | 0.074678 |           |            |           |     |
| KEGG_PATHWAY | hsa03420:Nucleotide excision repair        | 9     | 1.060071 | 2.86E-04 | RFC5, POLD3, RPA2, RF 256  |      | 47   | 6879 | 5.14552859  | 0.04639391 | 0.0067634 | 0.347118 |           |            |           |     |
| KEGG_PATHWAY | hsa03410:Base excision repair              | 7     | 0.824499 | 0.001166 | POLD3, POLE2, UNG, P 256   |      | 33   | 6879 | 5.699928977 | 0.17603308 | 0.0239126 | 1.407289 |           |            |           |     |
| KEGG_PATHWAY | hsa00240:Pyrimidine metabolism             | 11    | 1.295642 | 0.004055 | POLD3, PRIM1, TYMS, I 256  |      | 101  | 6879 | 2.926554765 | 0.49056714 | 0.0722006 | 4.816974 |           |            |           |     |
| KEGG_PATHWAY | hsa03018:RNA degradation                   | 9     | 1.060071 | 0.007365 | DIS3, EXOSC9, LSM8, E 256  |      | 77   | 6879 | 3.140777192 | 0.70684424 | 0.1154755 | 8.590158 |           |            |           |     |
| KEGG_PATHWAY | hsa04115:p53 signaling pathway             | 8     | 0.942285 | 0.011562 | CCNB1, CCNE2, PPM1D 256    |      | 67   | 6879 | 3.208488806 | 0.85492666 | 0.1609638 | 13.17789 |           |            |           |     |
| KEGG_PATHWAY | hsa03015:mRNA surveillance pathway         | 9     | 1.060071 | 0.019135 | CSTF3, ALYREF, HBS1L, 256  |      | 91   | 6879 | 2.657580701 | 0.95953309 | 0.2345356 | 20.92426 |           |            |           |     |
| KEGG_PATHWAY | hsa03440:Homologous recombination          | 5     | 0.588928 | 0.021122 | POLD3, RAD51C, RPA2, 256   |      | 29   | 6879 | 4.632947198 | 0.97109518 | 0.2385996 | 22.84804 |           |            |           |     |
| KEGG_PATHWAY | hsa05016:Huntington's disease              | 14    | 1.648999 | 0.025784 | NDUFB11, NDUFA8, SL 256    |      | 192  | 6879 | 1.959350586 | 0.98691499 | 0.2663585 | 27.19643 |           |            |           |     |
| KEGG_PATHWAY | hsa00670:One carbon pool by folate         | 4     | 0.471143 | 0.035999 | TYMS, MTHFD2L, DHFR 256    |      | 20   | 6879 | 5.37421875  | 0.99772574 | 0.3335167 | 35.94879 |           |            |           |     |
| KEGG_PATHWAY | hsa05012:Parkinson's disease               | 11    | 1.295642 | 0.037697 | NDUFB11, NDUFA8, SL 256    |      | 142  | 6879 | 2.0815636   | 0.99830261 | 0.3287855 | 37.30585 |           |            |           |     |
| KEGG_PATHWAY | hsa04114:Oocyte meiosis                    | 9     | 1.060071 | 0.053264 | CCNB1, ANAPC1, CCNE 256    |      | 111  | 6879 | 2.178737331 | 0.99988675 | 0.4140184 | 48.57612 |           |            |           |     |
| KEGG_PATHWAY | hsa00563:Glycosylphosphatidylinositol (GP) | 4     | 0.471143 | 0.063502 | PIGM, PIXG, PGAP1, PIC 256 |      | 25   | 6879 | 4.299375    | 0.99998137 | 0.4539558 | 54.94081 |           |            |           |     |
| KEGG_PATHWAY | hsa05166:HTLV-I infection                  | 15    | 1.766784 | 0.088682 | ANAPC1, SLC25A4, RAN 256   |      | 254  | 6879 | 1.586875615 | 0.99999998 | 0.5557361 | 67.6439  |           |            |           |     |

**Enriched KEGG pathways by genes over-expressed in Subtype II MCC**

| Category     | Term                                        | Count | %        | PValue   | Genes                      | List | Tota | Pop  | Hits        | Pop        | Total     | Fold     | Enrichmen | Bonferroni | Benjamini | FDR |
|--------------|---------------------------------------------|-------|----------|----------|----------------------------|------|------|------|-------------|------------|-----------|----------|-----------|------------|-----------|-----|
| KEGG_PATHWAY | hsa04668:TNF signaling pathway              | 13    | 1.990812 | 2.01E-04 | RPS6KA4, PTGS2, CCL2 229   |      | 107  | 6879 | 3.649634739 | 0.04543532 | 0.0454353 | 0.257918 |           |            |           |     |
| KEGG_PATHWAY | hsa04010:MAPK signaling pathway             | 20    | 3.062787 | 6.87E-04 | FGFR2, FGF7, TAOK1, I 229  |      | 253  | 6879 | 2.374648325 | 0.1467121  | 0.0762642 | 0.877287 |           |            |           |     |
| KEGG_PATHWAY | hsa04810:Regulation of actin cytoskeleton   | 17    | 2.603369 | 0.001555 | FGFR2, ENAH, FGF7, SS 229  |      | 210  | 6879 | 2.431752963 | 0.30197739 | 0.1129328 | 1.976815 |           |            |           |     |
| KEGG_PATHWAY | hsa04144:Endocytosis                        | 17    | 2.603369 | 0.006146 | SH3GL3, FGFR2, ARFGA 229   |      | 241  | 6879 | 2.118954864 | 0.75926088 | 0.2995346 | 7.604188 |           |            |           |     |
| KEGG_PATHWAY | hsa04622:RIG-I-like receptor signaling path | 8     | 1.225115 | 0.008149 | DDX58, IKBK, OTUD5, 229    |      | 70   | 6879 | 3.433063007 | 0.84894959 | 0.3147889 | 9.965283 |           |            |           |     |
| KEGG_PATHWAY | hsa04015:Rap1 signaling pathway             | 15    | 2.29709  | 0.009714 | FGFR2, F2RL3, MAGI2, I 229 |      | 210  | 6879 | 2.145664379 | 0.895105   | 0.3132598 | 11.77034 |           |            |           |     |
| KEGG_PATHWAY | hsa00601:Glycosphingolipid biosynthesis -   | 5     | 0.765697 | 0.0099   | B4GALT1, B3GALT1, FU 229   |      | 26   | 6879 | 5.776788713 | 0.89956374 | 0.2798666 | 11.98293 |           |            |           |     |
| KEGG_PATHWAY | hsa04912:GnRH signaling pathway             | 9     | 1.378254 | 0.01029  | PLA2G4A, PLD1, PLA2G 229   |      | 91   | 6879 | 2.97091991  | 0.9083014  | 0.2581855 | 12.42672 |           |            |           |     |
| KEGG_PATHWAY | hsa05160:Hepatitis C                        | 11    | 1.684533 | 0.012613 | DDX58, CLDN17, IKBK 229    |      | 133  | 6879 | 2.484453492 | 0.94671496 | 0.2780424 | 15.02756 |           |            |           |     |
| KEGG_PATHWAY | hsa04724:Glutamatergic synapse              | 10    | 1.531394 | 0.01308  | SLC17A7, PLA2G4A, PL 229   |      | 114  | 6879 | 2.635026431 | 0.95222819 | 0.2622365 | 15.54143 |           |            |           |     |
| KEGG_PATHWAY | hsa04024:cAMP signaling pathway             | 14    | 2.143951 | 0.014095 | PLD1, DRD2, HTR4, NF 229   |      | 198  | 6879 | 2.123991002 | 0.9623348  | 0.2577674 | 16.64907 |           |            |           |     |
| KEGG_PATHWAY | hsa04623:Cytosolic DNA-sensing pathway      | 7     | 1.071975 | 0.018761 | DDX58, IKBK, IFNA4, I 229  |      | 64   | 6879 | 3.285548581 | 0.98741192 | 0.3055143 | 21.57123 |           |            |           |     |
| KEGG_PATHWAY | hsa05200:Pathways in cancer                 | 22    | 3.690666 | 0.020057 | FGFR2, F2RL3, FGF7, PT 229 |      | 393  | 6879 | 1.681589386 | 0.99072273 | 0.3023337 | 22.88934 |           |            |           |     |
| KEGG_PATHWAY | hsa05161:Hepatitis B                        | 11    | 1.684533 | 0.021894 | DDX58, STAT6, IKBK, E 229  |      | 145  | 6879 | 2.278843548 | 0.99398564 | 0.3059821 | 24.72332 |           |            |           |     |
| KEGG_PATHWAY | hsa05144:Malaria                            | 6     | 0.918836 | 0.022314 | CSF3, SELP, CR1, LRP1, 229 |      | 49   | 6879 | 3.678281793 | 0.99455473 | 0.2935719 | 25.13775 |           |            |           |     |
| KEGG_PATHWAY | hsa04620:Toll-like receptor signaling pathv | 9     | 1.378254 | 0.023997 | IKBK, IFNA4, MAP3K8, 229   |      | 106  | 6879 | 2.550506715 | 0.99634242 | 0.2957941 | 26.77414 |           |            |           |     |
| KEGG_PATHWAY | hsa04064:NF-kappa B signaling pathway       | 8     | 1.225115 | 0.024824 | DDX58, CARD11, BCL1 229    |      | 87   | 6879 | 2.762234603 | 0.99699299 | 0.2893512 | 27.56633 |           |            |           |     |
| KEGG_PATHWAY | hsa04726:Serotonergic synapse               | 9     | 1.378254 | 0.030567 | PLA2G4A, PTGS2, HTR4 229   |      | 111  | 6879 | 2.435619025 | 0.99923154 | 0.3286037 | 32.85196 |           |            |           |     |
| KEGG_PATHWAY | hsa04977:Vitamin digestion and absorptior   | 4     | 0.612557 | 0.034769 | FOLH1, APOB, SLC19A3 229   |      | 22   | 6879 | 5.461691147 | 0.99971828 | 0.3496486 | 36.49185 |           |            |           |     |
| KEGG_PATHWAY | hsa04270:Vascular smooth muscle contracti   | 9     | 1.378254 | 0.039965 | AGTR1, PLA2G4A, PLA2 229   |      | 117  | 6879 | 2.310715485 | 0.99991904 | 0.3756705 | 40.7411  |           |            |           |     |
| KEGG_PATHWAY | hsa04723:Retrograde endocannabinoid sig     | 8     | 1.225115 | 0.049795 | SLC17A7, PTGS2, MGL 229    |      | 101  | 6879 | 2.379350599 | 0.99999249 | 0.4298493 | 48.0709  |           |            |           |     |
| KEGG_PATHWAY | hsa05202:Transcriptional misregulation in   | 11    | 1.684533 | 0.050342 | NFKB1, FLT1, ELK4, ME 229  |      | 167  | 6879 | 1.978636613 | 0.99999342 | 0.4186277 | 48.45324 |           |            |           |     |
| KEGG_PATHWAY | hsa04925:Aldosterone synthesis and secret   | 7     | 1.071975 | 0.051354 | AGTR1, STAR, NPR1, CA 229  |      | 81   | 6879 | 2.595989002 | 0.99999486 | 0.4110924 | 49.15318 |           |            |           |     |
| KEGG_PATHWAY | hsa04151:PI3K-Akt signaling pathway         | 18    | 2.756508 | 0.065006 | FGFR2, CSF3, FLT1, FGF 229 |      | 345  | 6879 | 1.567267894 | 0.99999982 | 0.4763592 | 57.78218 |           |            |           |     |
| KEGG_PATHWAY | hsa05215:Prostate cancer                    | 7     | 1.071975 | 0.071134 | FGFR2, IKBK, PDGFRA, 229   |      | 88   | 6879 | 2.389489877 | 0.99999996 | 0.4943101 | 61.1977  |           |            |           |     |
| KEGG_PATHWAY | hsa04014:Ras signaling pathway              | 13    | 1.990812 | 0.071467 | FGFR2, PLA2G4A, PLD1 229   |      | 226  | 6879 | 1.727924412 | 0.99999996 | 0.4825222 | 61.37554 |           |            |           |     |
| KEGG_PATHWAY | hsa04020:Calcium signaling pathway          | 11    | 1.684533 | 0.07328  | AGTR1, SLC8A1, P2RX1, 229  |      | 179  | 6879 | 1.845990583 | 0.99999998 | 0.4785337 | 62.33198 |           |            |           |     |
| KEGG_PATHWAY | hsa04610:Complement and coagulation ca      | 6     | 0.918836 | 0.077872 | MBL2, CR1, AZM, C4A, 229   |      | 69   | 6879 | 2.612113157 | 0.99999999 | 0.4876967 | 64.65764 |           |            |           |     |
| KEGG_PATHWAY | hsa04913:Ovarian steroidogenesis            | 5     | 0.765697 | 0.078179 | PLA2G4A, PTGS2, STAR 229   |      | 49   | 6879 | 3.065234828 | 0.99999999 | 0.4771322 | 64.80826 |           |            |           |     |
| KEGG_PATHWAY | hsa05218:Melanoma                           | 6     | 0.918836 | 0.085661 | FGF7, MET, PDGFRA, F 229   |      | 71   | 6879 | 2.538532505 | 1          | 0.4982058 | 68.30191 |           |            |           |     |
| KEGG_PATHWAY | hsa04919:Thyroid hormone signaling pathv    | 8     | 1.225115 | 0.086757 | NCOA2, DIO2, PFKFB2, 229   |      | 115  | 6879 | 2.089690526 | 1          | 0.4914823 | 68.78575 |           |            |           |     |
